# Supplementary material for: Multi-Responsive Molecular Encapsulation and Release Based on Hydrogen-Bonded Azo-Macrocycle
Source: MDPI journal article supplement (doi:10.3390/molecules28114437), 2023-05-30
Supplement: s1 [file s1]

## Supporting Information

### **Multi-Responsive Molecular Encapsulation and Release Based on Hydrogen-Bonded Azo-macrocycle**

Jinyang Wu, Xuan Sun, Xianghui Li, Xiaowei Li, Wen Feng and Lihua Yuan \*

*College of Chemistry, Key Laboratory of Radiation Physics and Technology of Ministry of Education, Institute of Nuclear Science and Technology, Sichuan University, Chengdu 610064, China; Jinyangwu1993@163.com (J.W.); Sunxuanchem@163.com (X.S.); xianghui.li@nrtmedtech.com (X.L.); lixw@scu.edu.cn (X.L.); wfeng9510@scu.edu.cn (W.F.)*

*\* Correspondence: lhyuan@scu.edu.cn (L. Y.)*

## Table of Contents

|                                                                                                            |           |
|------------------------------------------------------------------------------------------------------------|-----------|
| <b>Synthesis and characterization</b> .....                                                                | <b>3</b>  |
| <b>Host-guest chemistry of 1a and G1</b> .....                                                             | <b>6</b>  |
| <sup>1</sup> H NMR spectra for <b>1a</b> and <b>G1</b> interactions .....                                  | 6         |
| Job plot for determination of stoichiometry .....                                                          | 7         |
| HRMS spectrum of <b>G1C1a<sub>2</sub></b> .....                                                            | 7         |
| 2D NOESY spectrum for <b>G1C1a<sub>2</sub></b> .....                                                       | 8         |
| UV-vis titration experiments.....                                                                          | 8         |
| <b>Host-guest chemistry of 1a and G2</b> .....                                                             | <b>10</b> |
| <sup>1</sup> H NMR spectra for <b>1a</b> and <b>G2</b> interactions .....                                  | 10        |
| 2D NOESY spectrum for <b>G2C1a<sub>2</sub></b> .....                                                       | 11        |
| Job plot for determination of stoichiometry .....                                                          | 12        |
| HRMS spectrum of <b>G2C1a<sub>2</sub></b> .....                                                            | 13        |
| UV-vis titration experiments.....                                                                          | 13        |
| <b><sup>1</sup>H NMR spectra of host-guest complexes</b> .....                                             | <b>14</b> |
| <b>Job plot for determination of stoichiometry</b> .....                                                   | <b>16</b> |
| <b>HRMS spectra of complexes</b> .....                                                                     | <b>19</b> |
| <b>UV-vis titration experiments</b> .....                                                                  | <b>20</b> |
| <b>Photo-responsiveness of host 1a</b> .....                                                               | <b>23</b> |
| <b>Photo-responsive binding and release of the guests in G1C1a<sub>2</sub></b> .....                       | <b>24</b> |
| <b>Photo-responsive of host-guest complex G2C1a<sub>2</sub>, G3C1a<sub>2</sub>, G4C1a, and G5C1a</b> ..... | <b>24</b> |
| <b>Acid/base responsive of host-guest complexes</b> .....                                                  | <b>29</b> |
| <b>Cation-responsive release of the guest in G2C1a<sub>2</sub></b> .....                                   | <b>34</b> |
| <b>DFT calculation studies</b> .....                                                                       | <b>34</b> |
| <b>References</b> .....                                                                                    | <b>49</b> |

## Synthesis and characterization

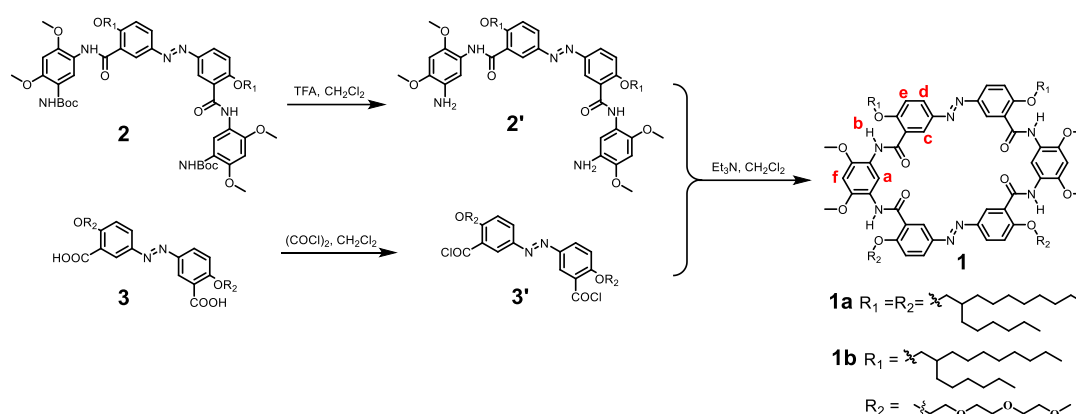

**Scheme S1** Synthetic route of **1a** and **1b**.

**1a** and **1b** were prepared according to literature procedures.<sup>[1]</sup> Because of the poor solubility of macrocycle **1a** in  $\text{CDCl}_3\text{-CD}_3\text{CN}$  (1:1, v/v), **1b** bearing two triglycol side chains was prepared. In Job plot experiments, **1b** was used to study the H-G interactions.

**1a**: yellow solid powder (yield: 64.3 %).  $^1\text{H}$  NMR (400 MHz,  $\text{CDCl}_3$ , 298 K):  $\delta$  9.98 (s, 2H), 9.75 (s, 4H), 9.24 (d,  $J = 2.6$  Hz, 4H), 7.99 (dd,  $J = 8.7, 2.7$  Hz, 4H), 7.09 (d,  $J = 8.8$  Hz, 4H), 6.53 (s, 2H), 4.15 (d,  $J = 6.3$  Hz, 8H), 3.91 (s, 12H), 2.12 (p,  $J = 6.2$  Hz, 4H), 1.63 – 1.15 (m, 108H), 0.85 (tt,  $J = 6.8, 3.3$  Hz, 24H).

**1b**: yellow solid powder (yield: 67.0 %).  $^1\text{H}$  NMR (400 MHz,  $\text{CDCl}_3$ , 298 K)  $\delta$  9.97 (s, 2H), 9.79 (d,  $J = 8.3$  Hz, 4H), 9.23 (dd,  $J = 6.2, 2.6$  Hz, 4H), 7.99 (dt,  $J = 8.7, 2.5$  Hz, 4H), 7.10 (dd,  $J = 8.9, 5.8$  Hz, 4H), 6.53 (s, 2H), 4.47 (t,  $J = 5.2$  Hz, 4H), 4.15 (d,  $J = 6.2$  Hz, 4H), 4.07 (t,  $J = 5.3$  Hz, 4H), 3.93 (d,  $J = 16.3$  Hz, 12H), 3.75 (dd,  $J = 5.8, 3.7$  Hz, 4H), 3.67 – 3.55 (m, 8H), 3.51 – 3.44 (m, 4H), 3.33 (s, 4H), 1.58 (s, 26H), 1.25 (d,  $J = 9.4$  Hz, 3H), 0.86 (td,  $J = 7.0, 6.6, 2.1$  Hz, 10H), 0.07 (s, 15H).

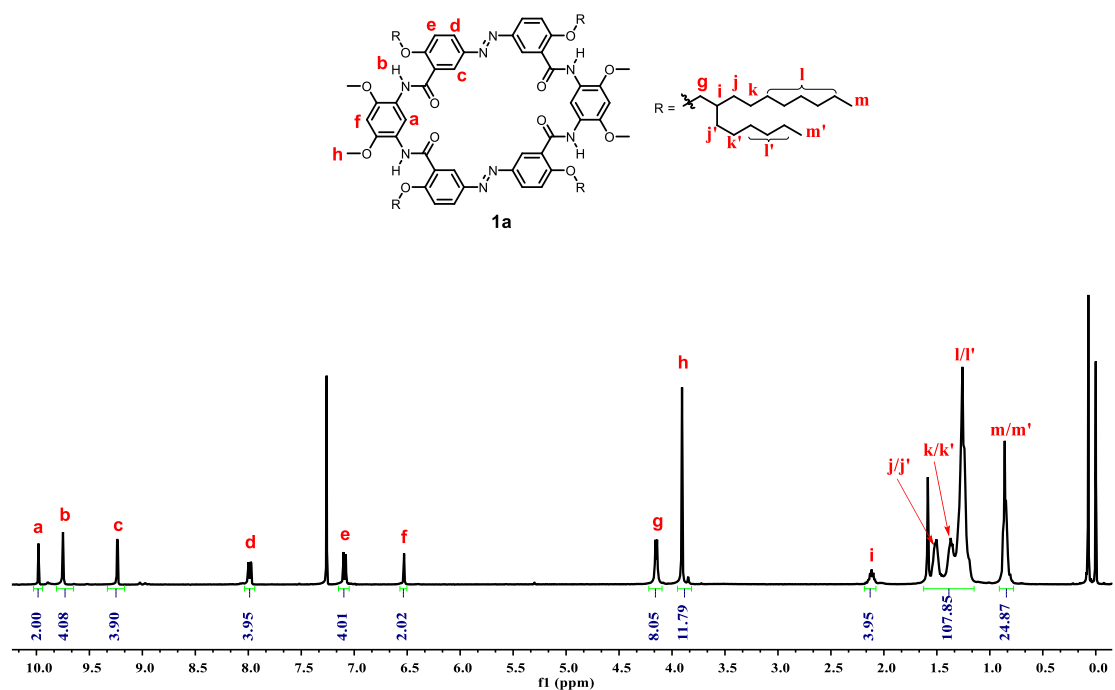

Figure S1  $^1\text{H}$  NMR spectrum (400 MHz,  $\text{CDCl}_3$ , 298 K) of **1a**.

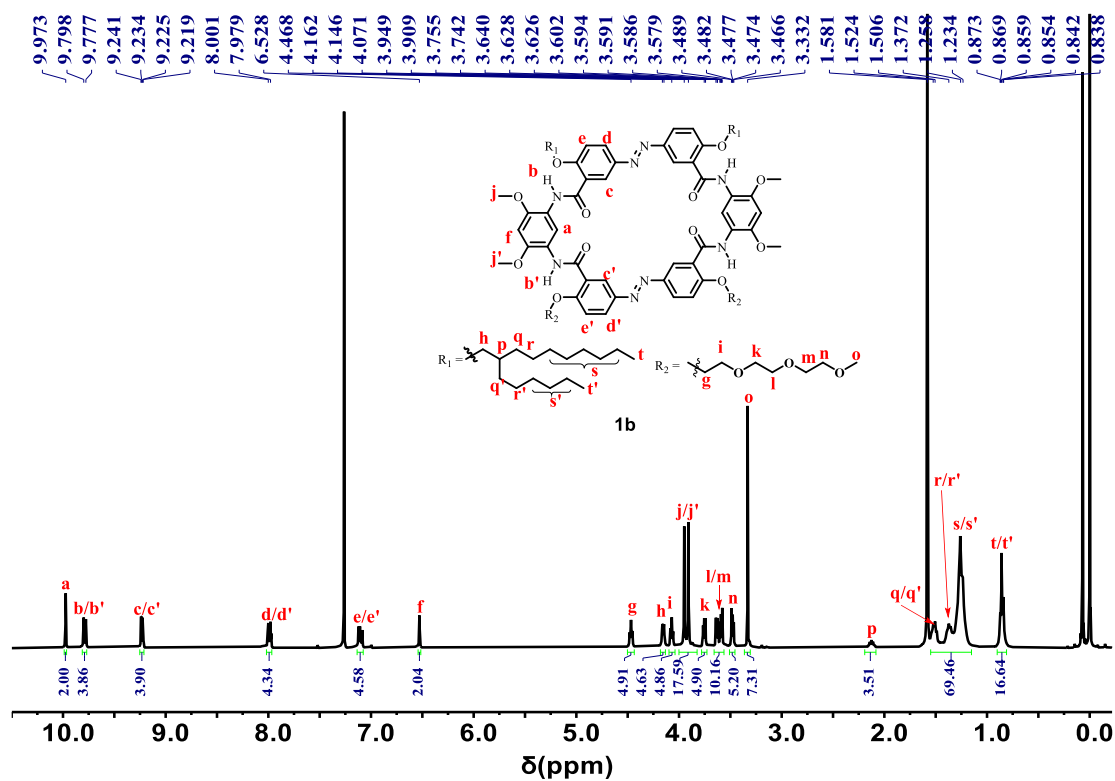

Figure S2  $^1\text{H}$  NMR spectrum (400 MHz,  $\text{CDCl}_3$ , 298 K) of **1b**.

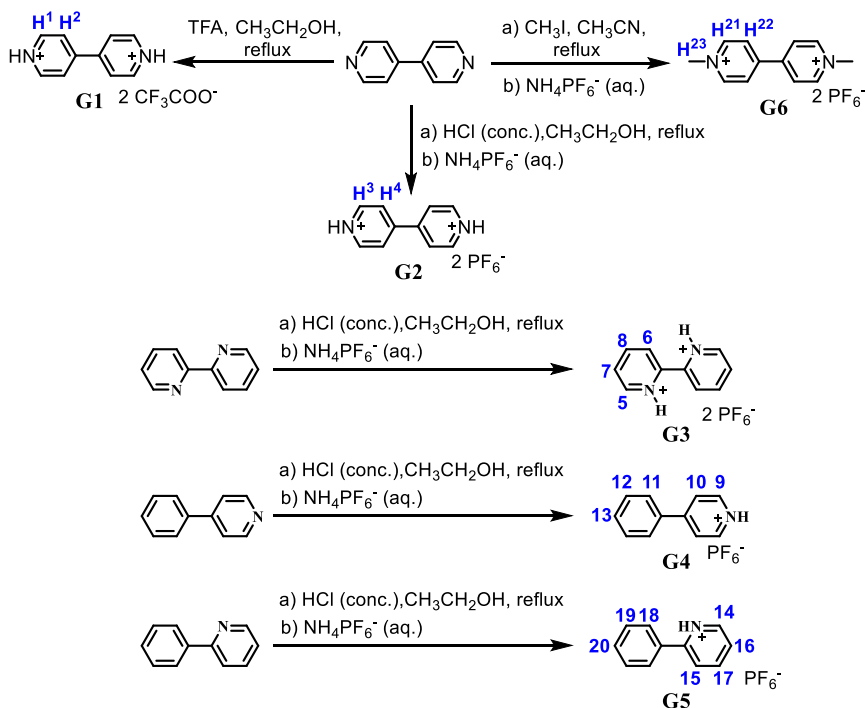

**Scheme S2** Synthetic routes of guests **G1-G6**.

#### Guest **G1** <sup>[2]</sup>

To a solution of 4,4'-bipyridine (235 mg, 1.50 mmol) in CH<sub>3</sub>CH<sub>2</sub>OH (5 mL), TFA (25 mL) was added. The mixture was stirred for overnight at 80 °C. The reaction mixture was added ice CH<sub>3</sub>CH<sub>2</sub>OH (100 mL) under ice bath after being cooled to room temperature. After filtration, the precipitate was collected and washed with ice CH<sub>3</sub>CH<sub>2</sub>OH (10 mL × 3). After being dried in vacuum for 24 h, guest **G1** (476 mg, 83.0%) was obtained as a white powder. <sup>1</sup>H NMR (400 MHz, CD<sub>3</sub>CN, 298 K) δ 8.97 – 8.88 (m, 4H, <sup>H<sup>1</sup></sup>), 8.16 – 8.09 (m, 4H, <sup>H<sup>2</sup></sup>).

#### Guest **G2** <sup>[3]</sup>

To a solution of 4,4'-bipyridine (235 mg, 1.50 mmol) in CH<sub>3</sub>CH<sub>2</sub>OH (5 mL), HCl (conc.) (25 mL) was added. The mixture was stirred for overnight at 80 °C. The reaction mixture was added ice CH<sub>3</sub>CH<sub>2</sub>OH (100 mL) under ice bath after being cooled to room temperature. The mixture was filtered and washed with ice CH<sub>3</sub>CH<sub>2</sub>OH (10 mL × 3). The solid was dissolved in water. The saturated aqueous solution of NH<sub>4</sub>PF<sub>6</sub> was slowly added to the solution above and the mixture was stirred for 0.5 hr. After filtration, the precipitate was collected and washed with H<sub>2</sub>O. After being dried in vacuum for 24 h, guest **G2** (430 mg, 48.3%) was obtained as a white powder. <sup>1</sup>H NMR (400 MHz, CD<sub>3</sub>COCD<sub>3</sub>, 298 K) 9.13 – 9.06 (m, 4H, <sup>H<sup>3</sup></sup>), 8.38 – 8.32 (m, 4H, <sup>H<sup>4</sup></sup>).

**G3-G5** were prepared according to similar procedures of **G2**.

**G3:** white solid powder (yield: 51.6 %). <sup>[3]</sup> <sup>1</sup>H NMR (400 MHz, CD<sub>3</sub>CN, 298 K) δ 8.85 (ddd, J = 5.3, 1.6, 0.9 Hz, 2H, <sup>5</sup>), 8.51 (dt, J = 8.1, 1.1 Hz, 2H, <sup>6</sup>), 8.44 (td, J = 7.8, 1.6 Hz, 2H, <sup>7</sup>), 7.91 (ddd, J = 7.6, 5.3, 1.3 Hz, 2H, <sup>8</sup>).

**G4:** white solid powder (yield: 54.3 %).  $^1\text{H}$  NMR (400 MHz,  $\text{CDCl}_3\text{-CD}_3\text{CN}$ , 5:1, v/v, 298 K)  $\delta$  8.71 (d,  $J$  = 5.7 Hz, 2H, **9**), 7.94 – 7.87 (m, 2H, **10**), 7.79 – 7.73 (m, 2H, **11**), 7.60 – 7.54 (m, 3H, **12/13**).

**G5:** white solid powder (yield: 56.8 %).  $^1\text{H}$  NMR (400 MHz,  $\text{CDCl}_3\text{-CD}_3\text{CN}$ , 5:1, v/v, 298 K)  $\delta$  8.78 (ddd,  $J$  = 6.0, 1.7, 0.8 Hz, 1H, **14**), 8.62 (td,  $J$  = 8.0, 1.6 Hz, 1H, **15**), 8.25 (dt,  $J$  = 8.3, 1.0 Hz, 1H, **16**), 8.01 (ddd,  $J$  = 7.5, 6.0, 1.3 Hz, 1H, **17**), 7.90 – 7.85 (m, 2H, **18**), 7.75 – 7.65 (m, 3H, **19/20**).

Guest **G6** <sup>[4]</sup>

**G6** was prepared according to reference procedures. To a solution of 4,4'-bipyridine (400 mg, 2.60 mmol) in  $\text{CH}_3\text{CN}$  (15 mL),  $\text{CH}_3\text{I}$  (3 mL) was added. The mixture was stirred overnight at 80 °C. The reaction mixture was filtered after being cooled to room temperature. The solid was then washed with  $\text{CH}_3\text{CN}$  and dissolved in water. The saturated aqueous solution of  $\text{NH}_4\text{PF}_6$  was slowly added to the solution above and the mixture was stirred for 0.5 hr. After filtration, the precipitate was collected and washed with  $\text{H}_2\text{O}$ . After being dried in vacuum for 24 h, **G6** (1.02 g, 91.0 %) was obtained as a white powder.  $^1\text{H}$  NMR (400 MHz,  $\text{CD}_3\text{CN}$ , 298 K)  $\delta$  8.86 – 8.79 (m, 4H,  $\text{H}^{\text{P}1}$ ), 8.35 (d,  $J$  = 6.3 Hz, 4H,  $\text{H}^{\text{P}2}$ ), 4.38 (s, 6H,  $\text{H}^{\text{P}3}$ ).

## Host-guest chemistry of **1a** and **G1**

### $^1\text{H}$ NMR spectra for **1a** and **G1** interactions

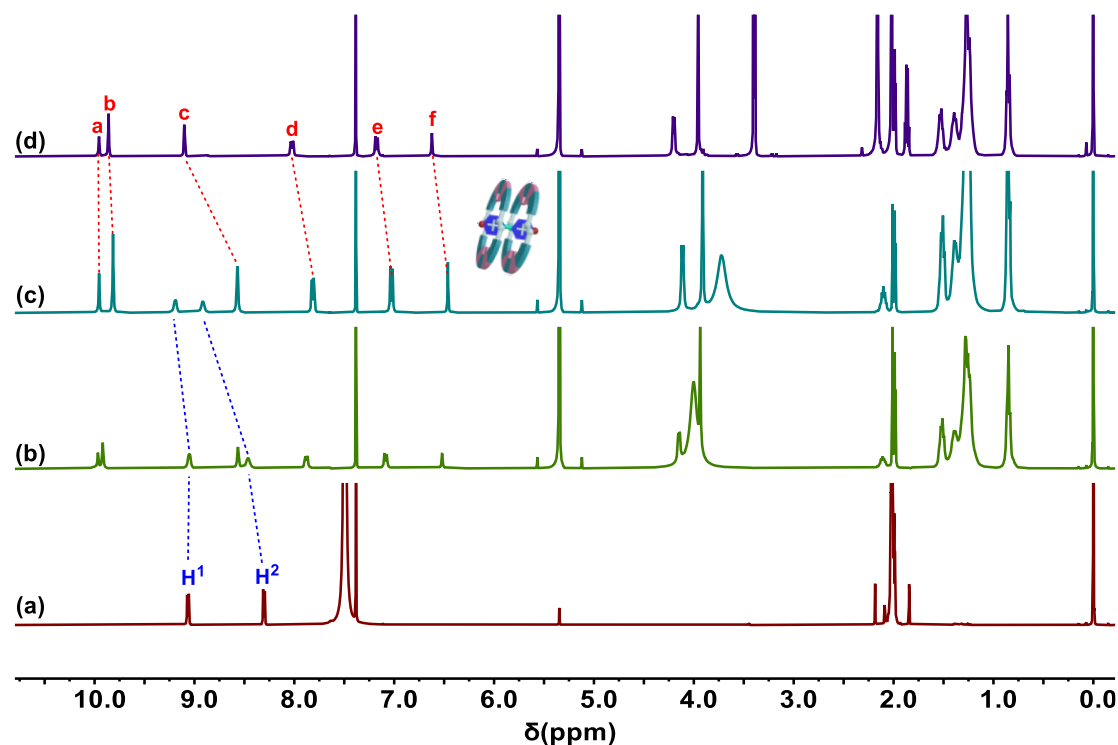

**Figure S3**  $^1\text{H}$  NMR spectra (400 MHz,  $\text{CDCl}_3\text{-CD}_3\text{CN}$ , 5:1, v/v, 298 K) of (a) **G1** (1.0 mM), (b) **1a** and **G1** (1.0 mM for each), (c) **1a** (2.0 mM) and **G1** (1.0 mM) and (d) **1a** (1.0 mM).

## Job plot for determination of stoichiometry

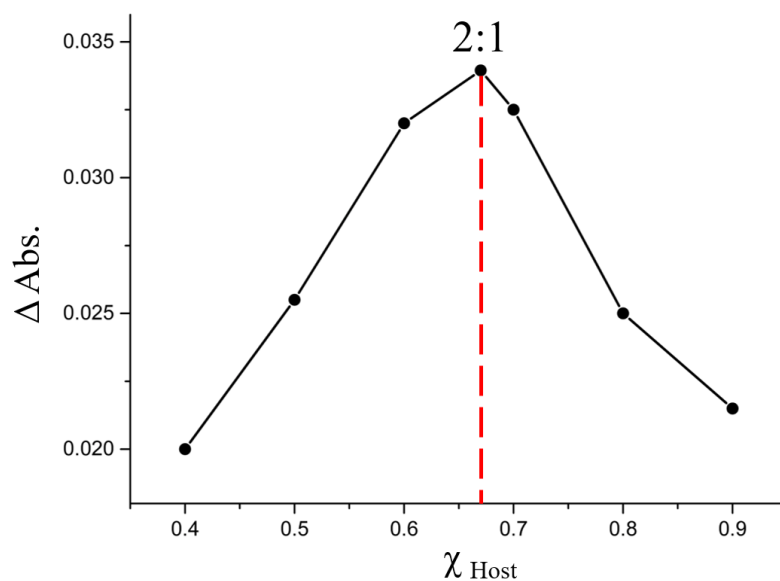

**Figure S4** Job plot for determination of stoichiometry of **1a** and **G1** based on the absorbance at 400 nm in  $\text{CHCl}_3\text{-CH}_3\text{CN}$  (5:1, v/v, 298 K).  $[\mathbf{1a}] + [\mathbf{G1}] = 50 \mu\text{M}$ .

## HRMS spectrum of $\mathbf{G1} \subset \mathbf{1a}_2$

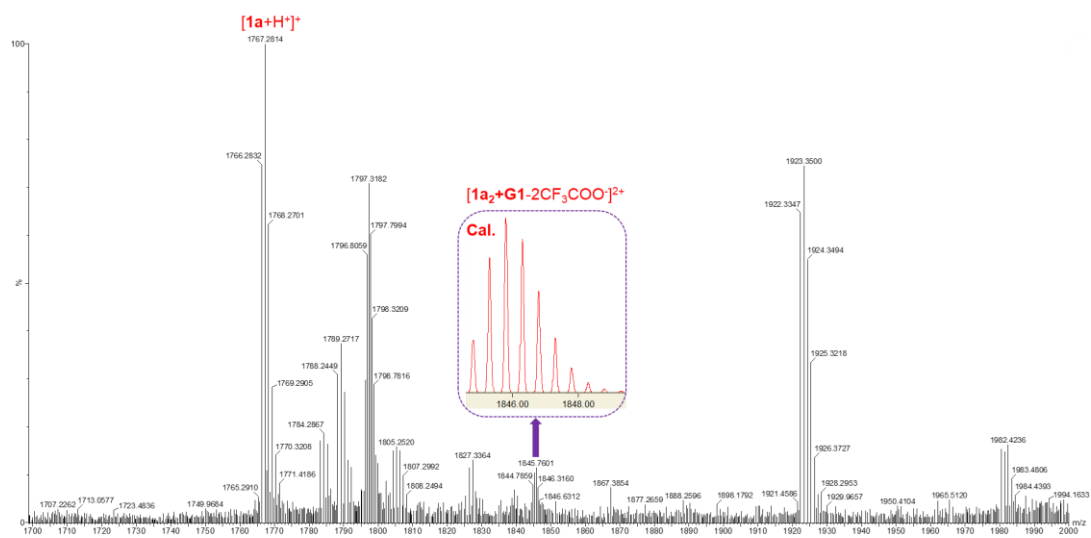

**Figure S5** Partial HRMS spectrum of  $\mathbf{G1} \subset \mathbf{1a}_2$  complex in  $\text{CHCl}_3\text{-CH}_3\text{CN}$  (5:1, v/v). HRMS (ESI) calculated for  $[\mathbf{1a}_2 + \mathbf{G1} - 2\text{CF}_3\text{COO}]^{2+}$ , m/z, 1845.2919, found 1845.3367.

## 2D NOESY spectrum for G1 $\subset$ 1a<sub>2</sub>

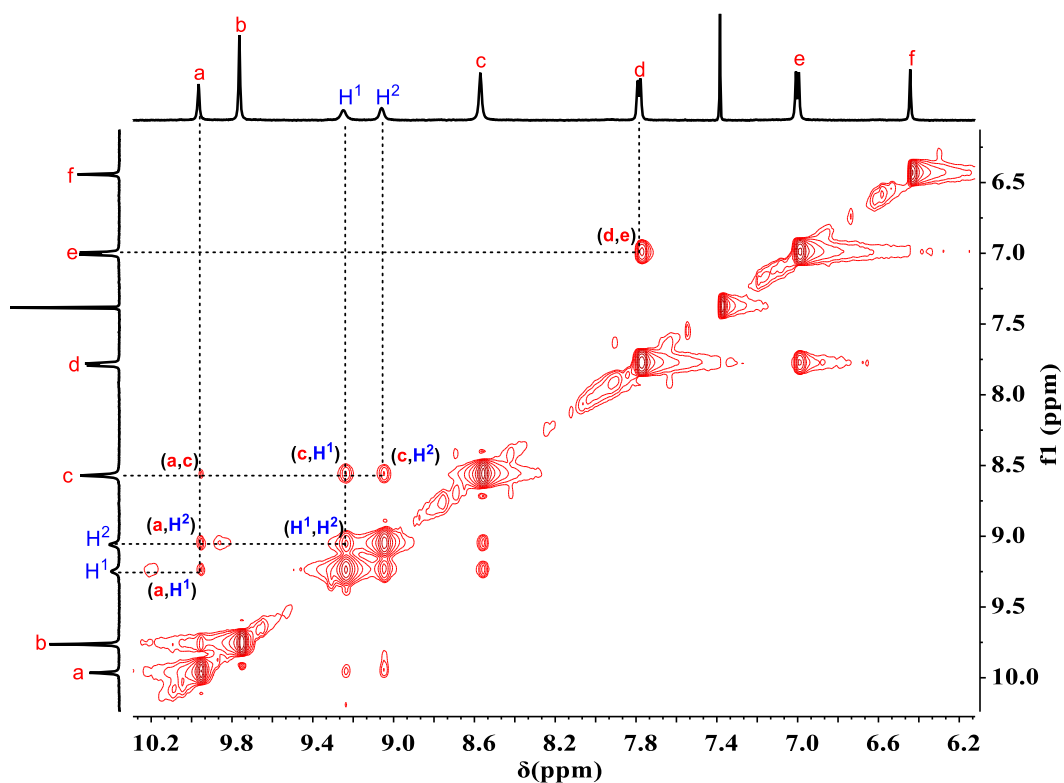

**Figure S6** Expanded 2D-NOESY spectrum of **G1** $\subset$ **1a**<sub>2</sub> ([**1a**] = 10 mM, [**G1**] = 5 mM, **1a**:**G1** = 2:1) (600 MHz, CDCl<sub>3</sub>-CD<sub>3</sub>CN, 5:1, v/v, 298 K, mixing time=0.4 s).

## UV-vis titration experiments

To determine the binding constant ( $K_a$ ) of macrocycle **1a** and guest **G1**, UV-vis titration experiments were performed in CHCl<sub>3</sub>-CH<sub>3</sub>CN (5:1, v/v, 298 K) at a constant concentration of **1a** (50  $\mu$ M) and varying concentration of **G1**. For the titration, at least 20 data points were collected. Binding constant was calculated by a global fitting analysis according to a 2:1 binding model using the website (<http://supramolecular.org/>).



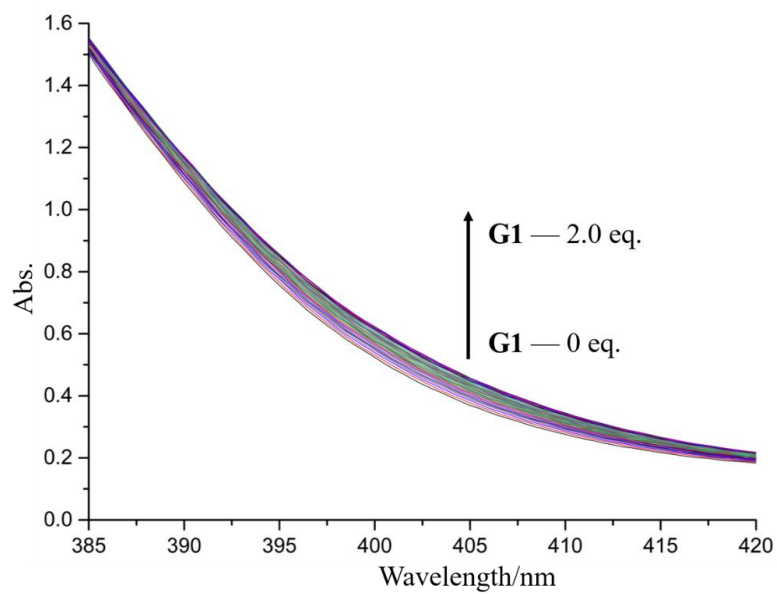

**Figure S7** Stacked UV-vis spectra of **1a** (50  $\mu$ M) titrated with **G1** from 0 equiv. to 2.0 equiv. in  $\text{CHCl}_3\text{-CH}_3\text{CN}$  (5:1, v/v, 298 K).

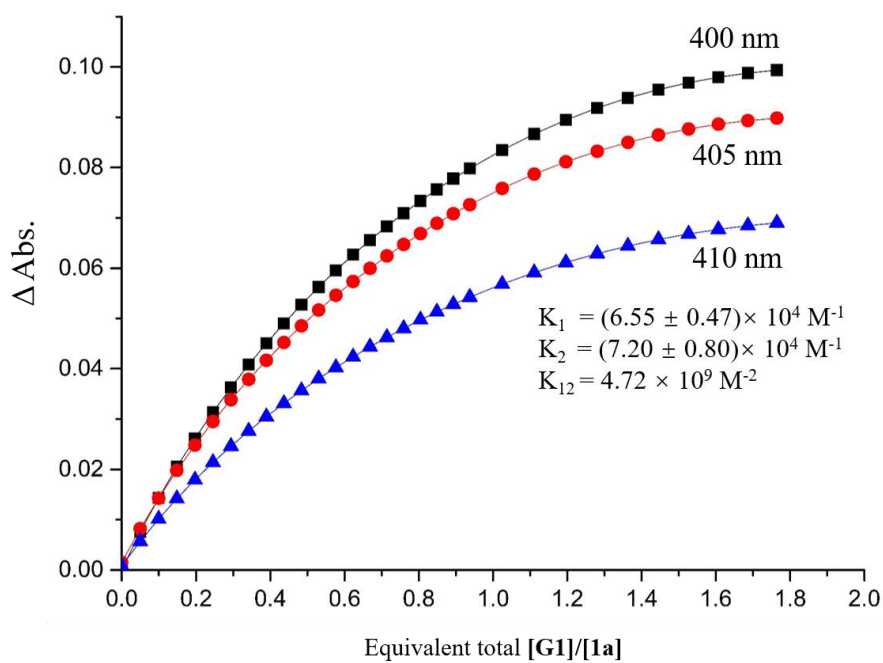

**Figure S8** Curve fitting of the binding constant of **G1** to **1a<sub>2</sub>** in  $\text{CHCl}_3\text{-CH}_3\text{CN}$  (5:1, v/v, 298 K). The reported binding constant is the average value based on fitting of the absorbance at 400 nm, 405 nm, and 410 nm.

## Host-guest chemistry of 1a and G2

### $^1\text{H}$ NMR spectra for 1a and G2 interactions

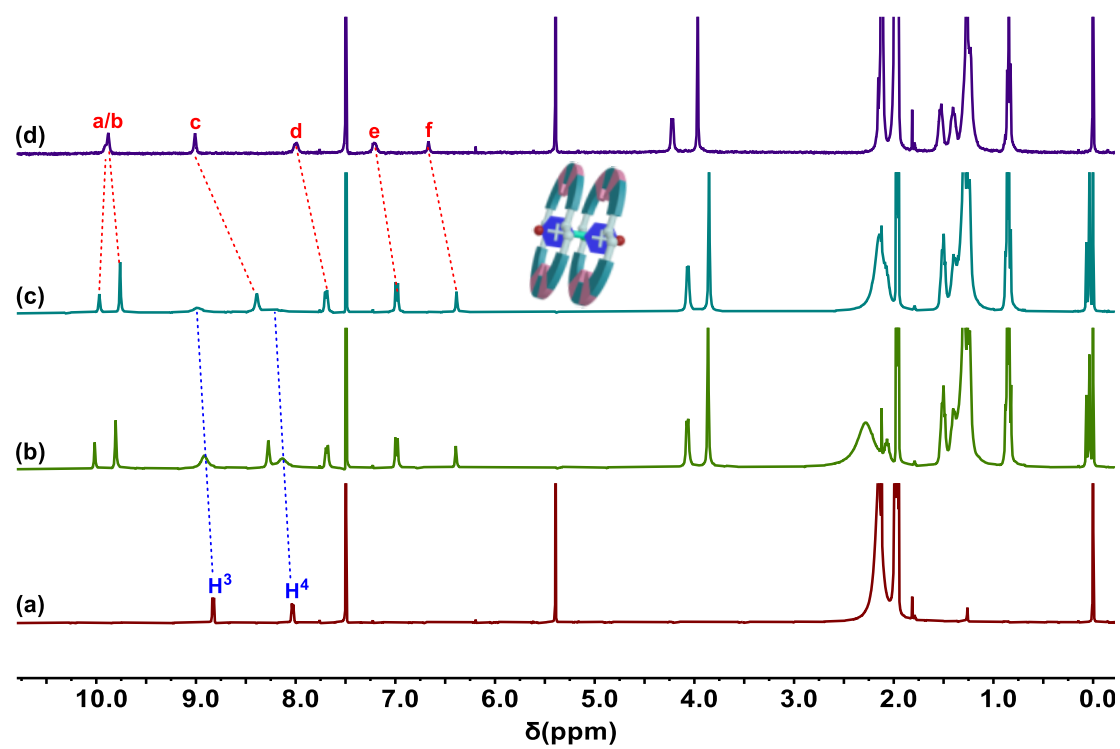

**Figure S9**  $^1\text{H}$  NMR spectra (400 MHz,  $\text{CDCl}_3\text{-CD}_3\text{CN}$ , 1:1, v/v, 298 K) of (a) G2 (1.0 mM), (b) 1a and G2 (1.0 mM for each), (c) 1a (2.0 mM) and G2 (1.0 mM) and (d) 1a (1.0 mM).

## 2D NOESY spectrum for G2C1a<sub>2</sub>

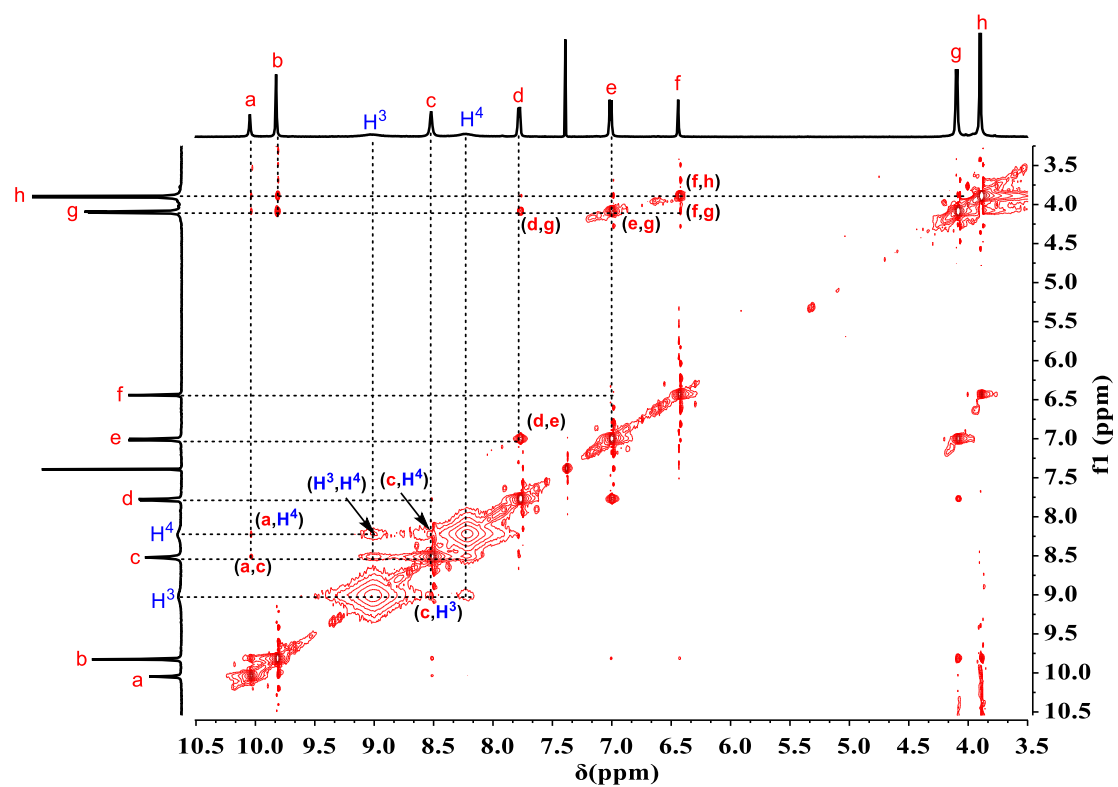

**Figure S10** Expanded 2D-NOESY spectrum of G2C1a<sub>2</sub> ([1a] = 10 mM, [G2] = 5 mM, 1a:G2 = 2:1) (600 MHz, CDCl<sub>3</sub>-CD<sub>3</sub>CN, 1:1, v/v, 298 K, mixing time = 0.4 s).

## Job plot for determination of stoichiometry

Because of the poor solubility of host **1a** in  $\text{CHCl}_3\text{-CD}_3\text{CN}$  (1:1, v/v), host **1b** was used for Job plot.

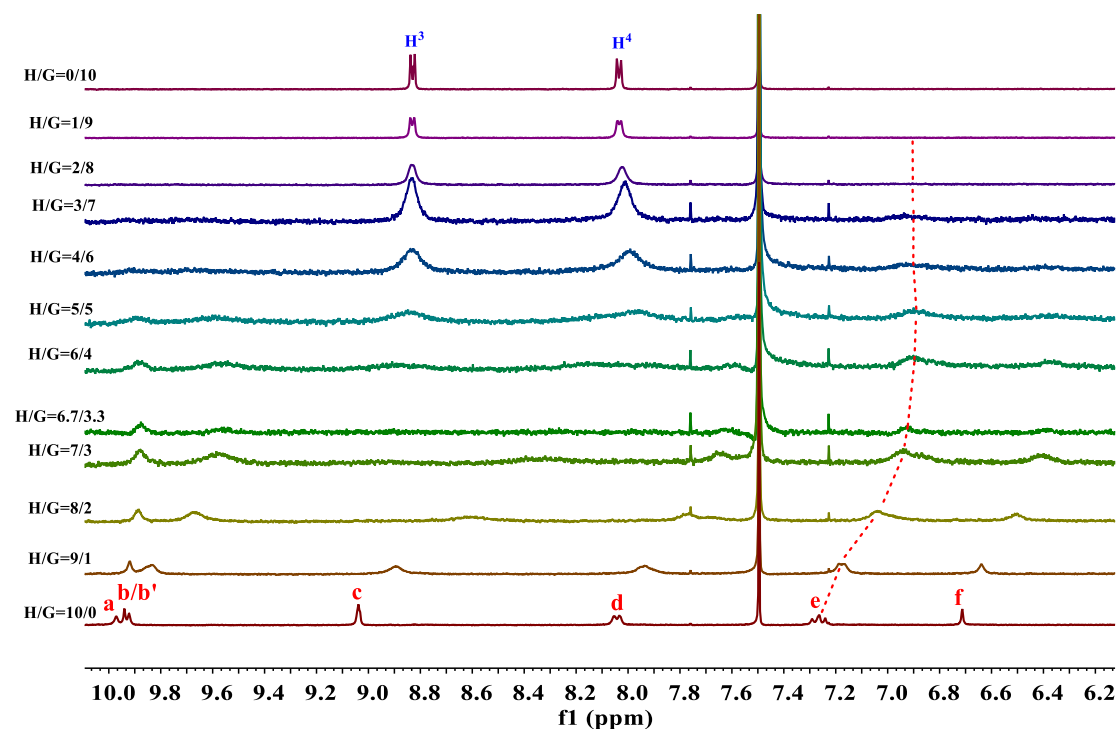

**Figure S11** Partial stacked  $^1\text{H}$ -NMR spectra (CDCl<sub>3</sub>-CD<sub>3</sub>CN, 1:1, v/v, 400 MHz, 298 K) utilized in Job plot between **1b** and **G2**. [1b]+[G2]=1 mM.

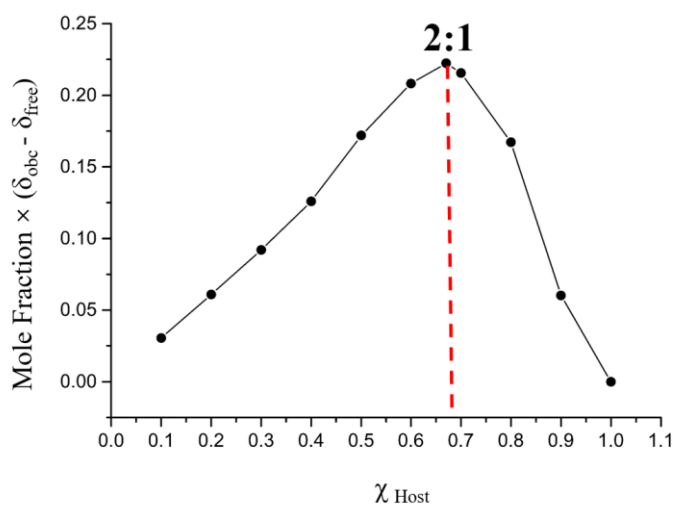

**Figure S12** Job plot showing a peak maximum was reached around 0.67 corresponding to the formation of a 2:1 host-guest complex between **1b** and **G2**. The plot was constructed from data shown in **Figure S11**.

## HRMS spectrum of G2⊂1a<sub>2</sub>

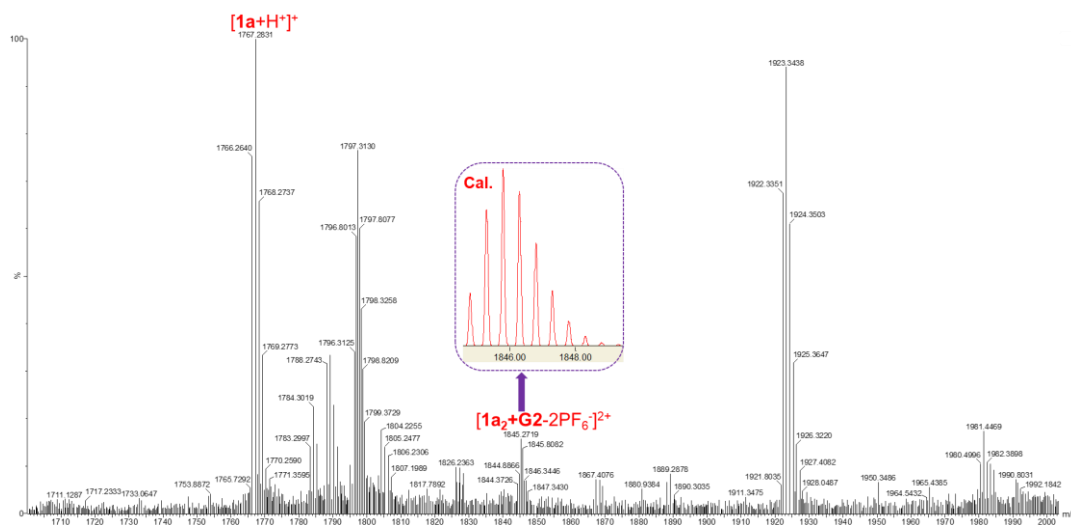

**Figure S13** Partial HRMS spectrum of G2⊂1a<sub>2</sub> complex in CHCl<sub>3</sub>-CH<sub>3</sub>CN (1:1, v/v). HRMS (ESI) calculated for [1a<sub>2</sub>+G2-2PF<sub>6</sub>]<sup>2+</sup>, m/z, 1845.2919, found 1845.2719.

## UV-vis titration experiments

To determine the binding constant ( $K_a$ ) of macrocycle **1a** and guest **G2**, UV-vis titration experiments were performed in CHCl<sub>3</sub>-CH<sub>3</sub>CN (1:1, v/v, 298 K) at a constant concentration of **1a** (50 μM) and varying concentration of **G2**. For the titration, at least 20 data points were collected. Binding constant was calculated by a global fitting analysis according to a 2:1 binding model using the website (<http://supramolecular.org/>).

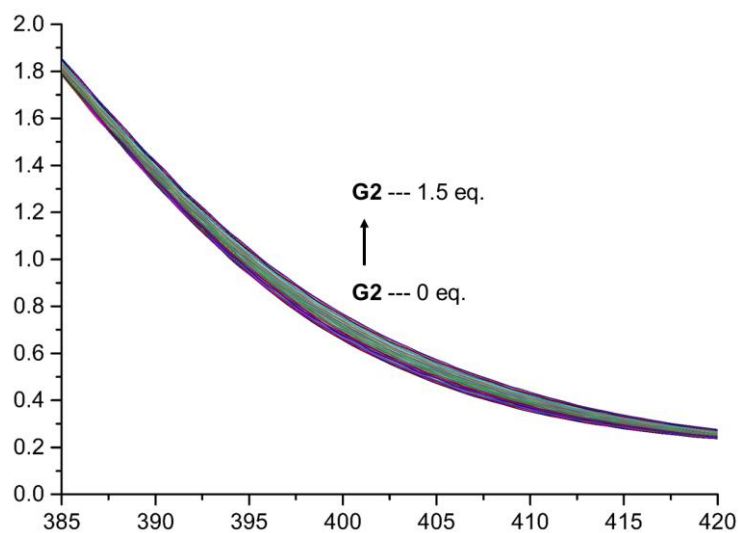

**Figure S14** Stacked UV-vis spectra of **1a** (50 μM) titrated with **G2** from 0 equiv. to 1.5 equiv. in CHCl<sub>3</sub>-CH<sub>3</sub>CN (1:1, v/v 298 K).

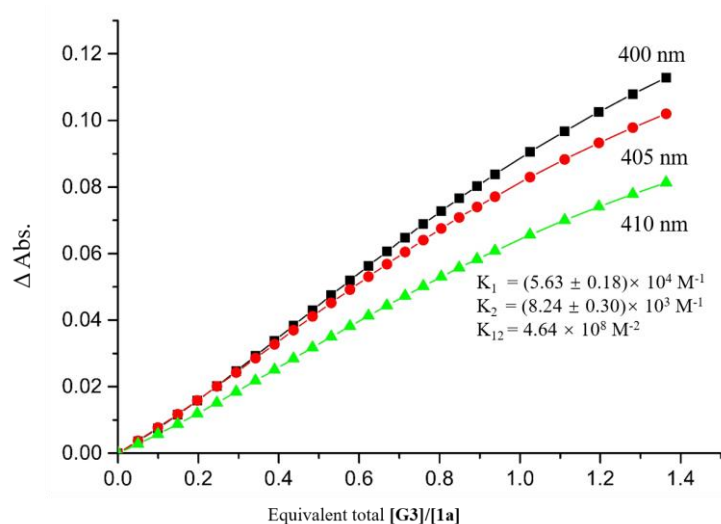

**Figure S15** Curve fitting of the binding constant of **G2** to **1a** in  $\text{CHCl}_3\text{-CH}_3\text{CN}$  (1:1, v/v, 298 K). The reported binding constant is the average value based on fitting of the absorbance at 400 nm, 405 nm and 410 nm.

### $^1\text{H}$ NMR spectra of host-guest complexes

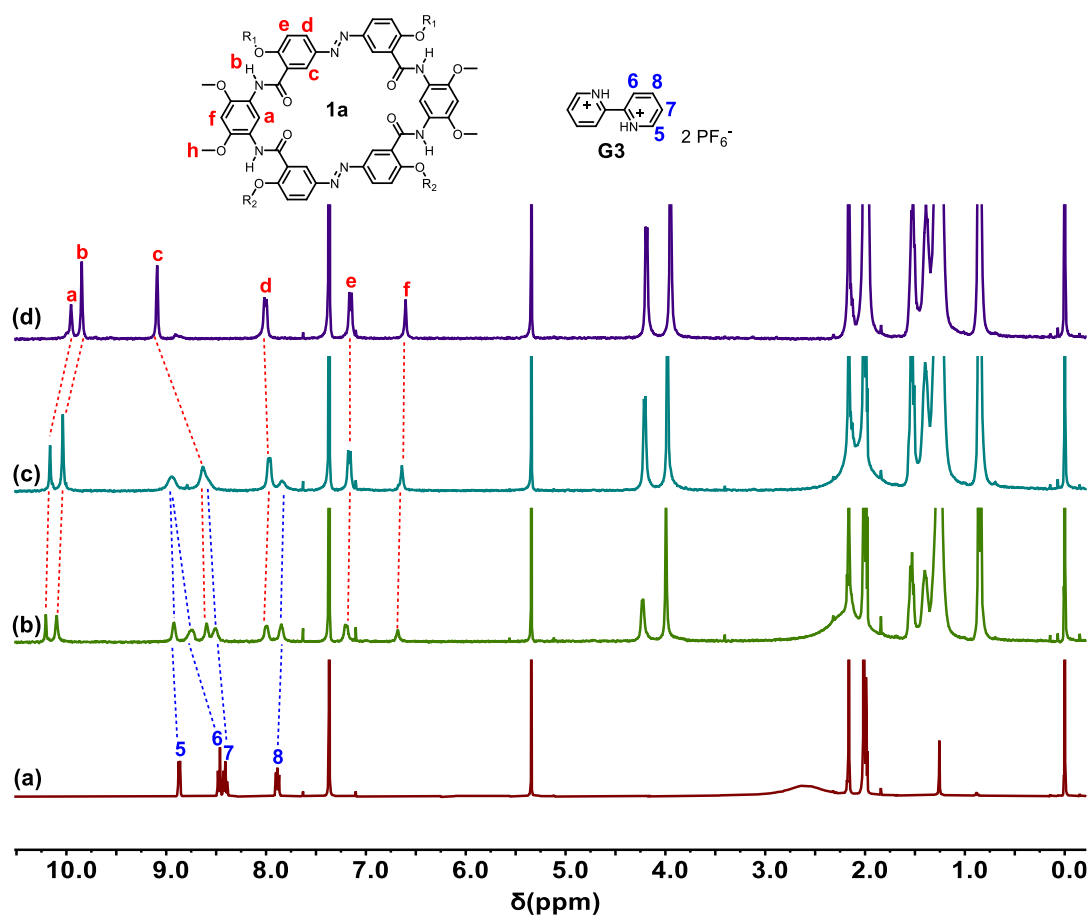

**Figure S16**  $^1\text{H}$  NMR spectra ( $\text{CDCl}_3\text{-CD}_3\text{CN}$ , 5:1, v/v, 400 MHz, 298 K) of (a) free **G3** (1.0 mM), (b) **1a** (1 mM) and **G3** (1 mM), (c) **1a** (2 mM) and **G3** (1 mM), and (d) free **1a** (1.0 mM).

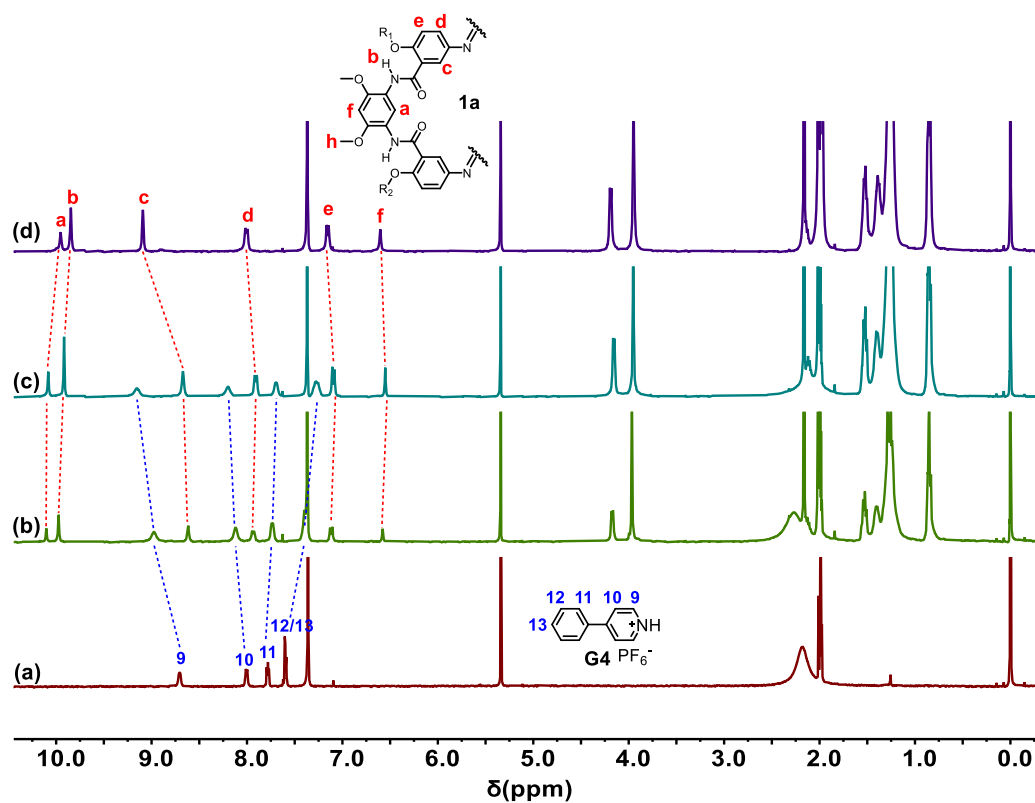

**Figure S17**  $^1\text{H}$  NMR spectra (CDCl<sub>3</sub>-CD<sub>3</sub>CN, 5:1, v/v, 400 MHz, 298 K) of (a) free **G4** (2.0 mM), (b) **1a** (1 mM) and **G4** (2 mM), (c) **1a** (2 mM) and **G4** (2 mM), and (d) free **1a** (2.0 mM).

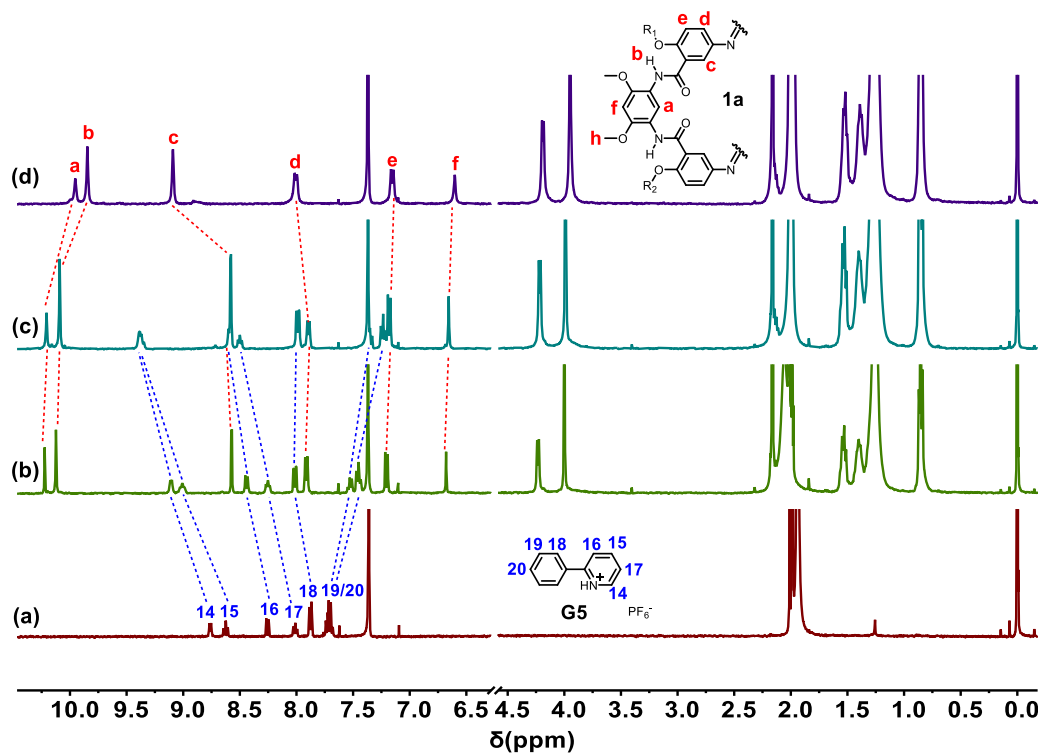

**Figure S18**  $^1\text{H}$  NMR spectra (CDCl<sub>3</sub>-CD<sub>3</sub>CN, 5:1, v/v, 400 MHz, 298 K) of (a) free **G5** (2.0 mM), (b) **1a** (1 mM) and **G5** (2 mM), (c) **1a** (2 mM) and **G5** (2 mM), and (d) free **1a** (2.0 mM).

## Job plot for determination of stoichiometry

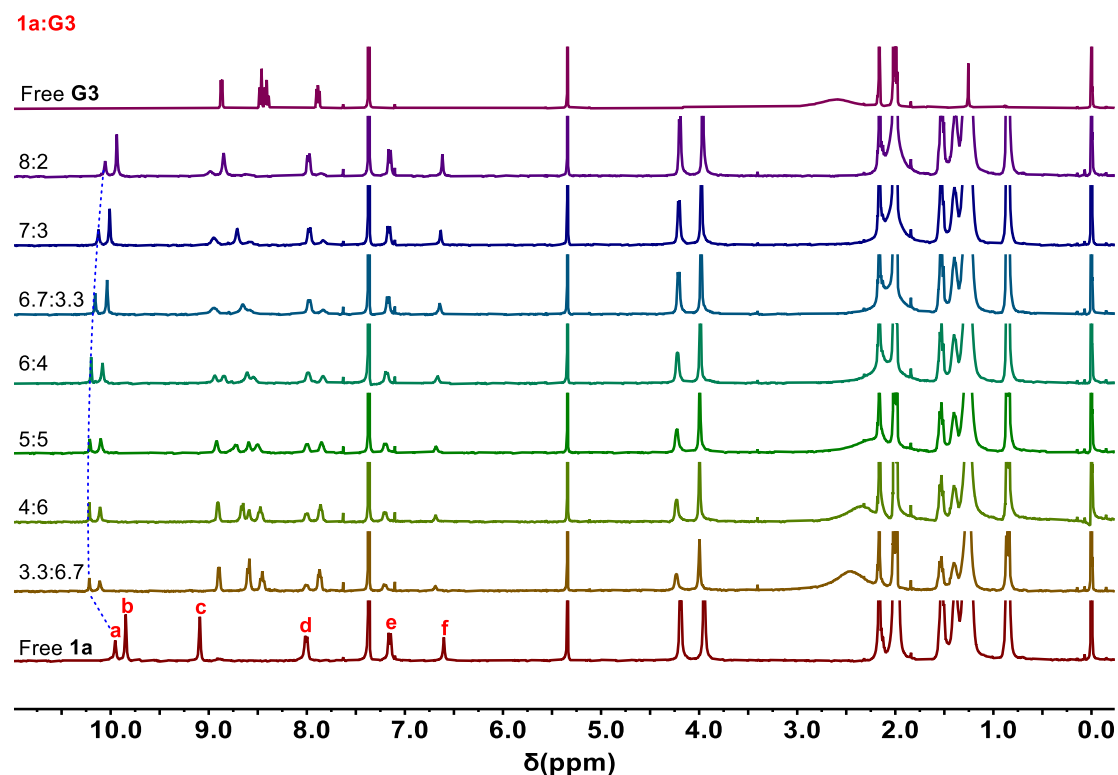

**Figure S19** Stack  $^1\text{H}$  NMR spectra ( $\text{CDCl}_3\text{-CD}_3\text{CN}$ , 5:1, v/v, 400 MHz, 298 K) utilized in the job plot between **1a** and **G3**.  $[\text{1a}] + [\text{G3}] = 2.0 \text{ mM}$ .

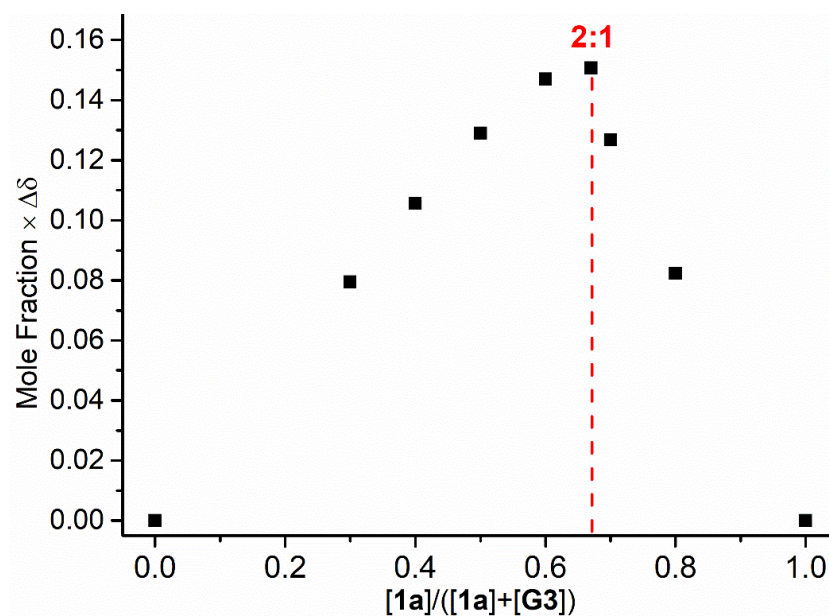

**Figure S20** Job plot showing a peak maximum was reached around 0.67 corresponding to the formation of a 2:1 host-guest complex between **1a** and **G3**. The plot was constructed from data shown in **Figure S19**.



**1a:G4**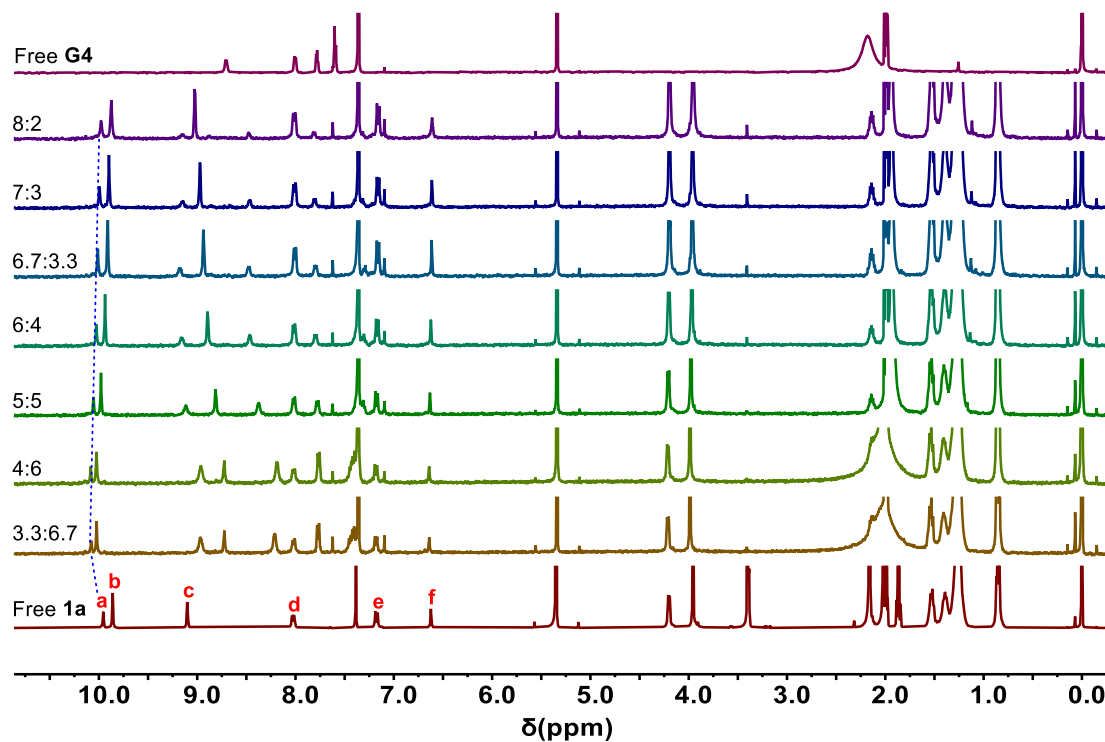

**Figure S21** Stack  $^1\text{H}$  NMR spectra (CDCl<sub>3</sub>-CD<sub>3</sub>CN, 5:1, v/v, 400 MHz, 298 K) utilized in the job plot between **1a** and **G4**. [**1a**] + [**G4**] = 2.0 mM.

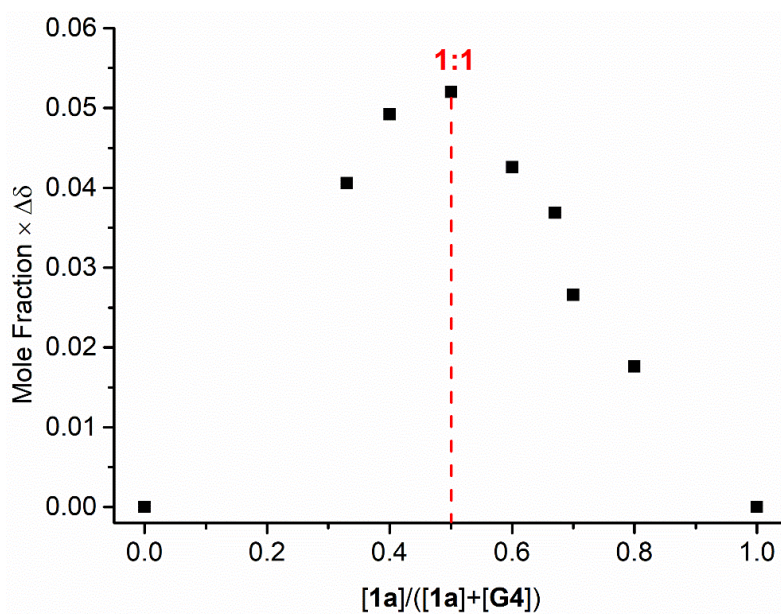

**Figure S22** Job plot showing a peak maximum was reached around 0.5 corresponding to the formation of a 1:1 host-guest complex between **1a** and **G4**. The plot was constructed from data shown in **Figure S21**.

1a:G5

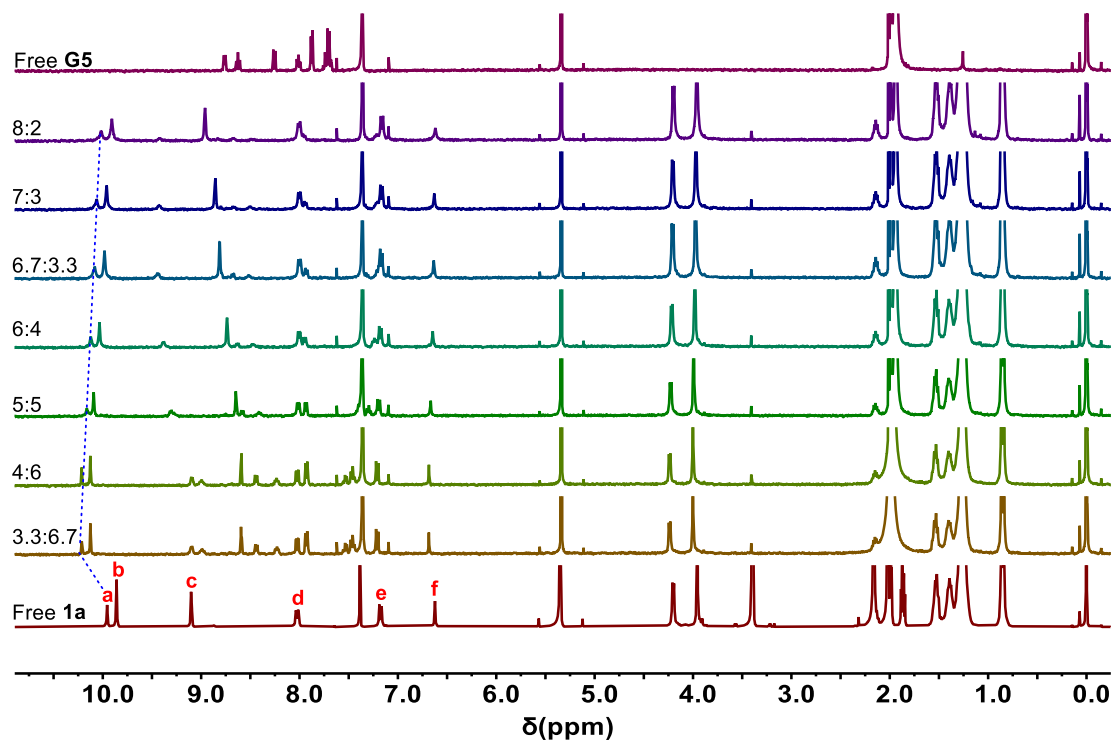

**Figure S23** Stack  $^1\text{H}$  NMR spectra (CDCl<sub>3</sub>-CD<sub>3</sub>CN, 5:1, v/v, 400 MHz, 298 K) utilized in the job plot between 1a and G5. [1a] + [G5] = 2.0 mM.

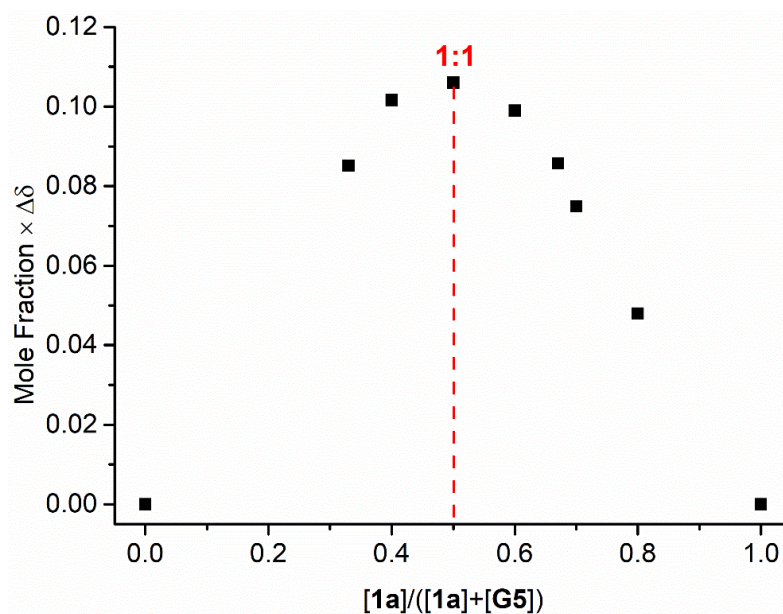

**Figure S24** Job plot showing a peak maximum was reached around 0.5 corresponding to the formation of a 1:1 host-guest complex between 1a and G5. The plot was constructed from data shown in Figure S23.

## HRMS spectra of complexes

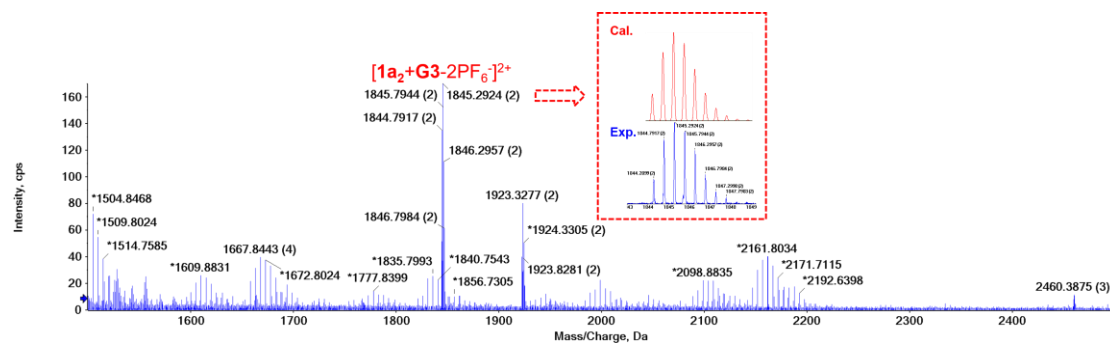

**Figure S25** Partial HRMS spectrum of  $\text{G3} \subset \text{1a} \cdot 2\text{PF}_6$  complex in  $\text{CHCl}_3\text{-CH}_3\text{CN}$  (5:1, v/v). HRMS (ESI) calculated for  $[\text{1a}_2 + \text{G3} - 2\text{PF}_6]^{2+}$ , m/z, 1845.2919, found 1845.2924. Inserted images show the calculated (top, red) and experimented (bottom, blue) isotope patterns.

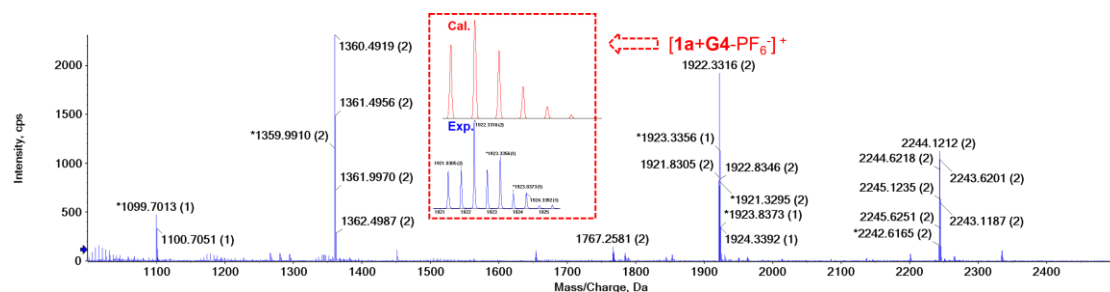

**Figure S26** Partial HRMS spectrum of  $\text{G4} \subset \text{1a} \cdot \text{PF}_6$  complex in  $\text{CHCl}_3\text{-CH}_3\text{CN}$  (5:1, v/v). HRMS (ESI) calculated for  $[\text{1a} + \text{G4} - \text{PF}_6]^+$ , m/z, 1922.3310, found 1922.3316. Inserted images show the calculated (top, red) and experimented (bottom, blue) isotope patterns.

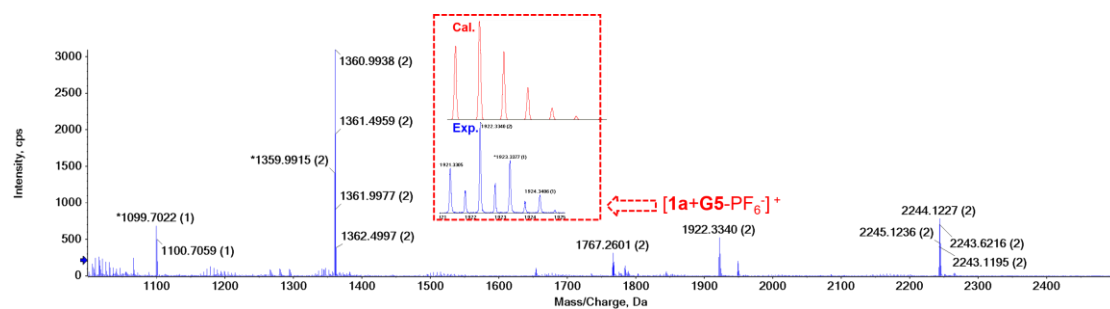

**Figure S27** Partial HRMS spectrum of  $\text{G5} \subset \text{1a} \cdot \text{PF}_6$  complex in  $\text{CHCl}_3\text{-CH}_3\text{CN}$  (5:1, v/v). HRMS (ESI) calculated for  $[\text{1a} + \text{G5} - \text{PF}_6]^+$ , m/z, 1922.3310, found 1922.3340. Inserted images show the calculated (top, red) and experimented (bottom, blue) isotope patterns.

## UV-vis titration experiments

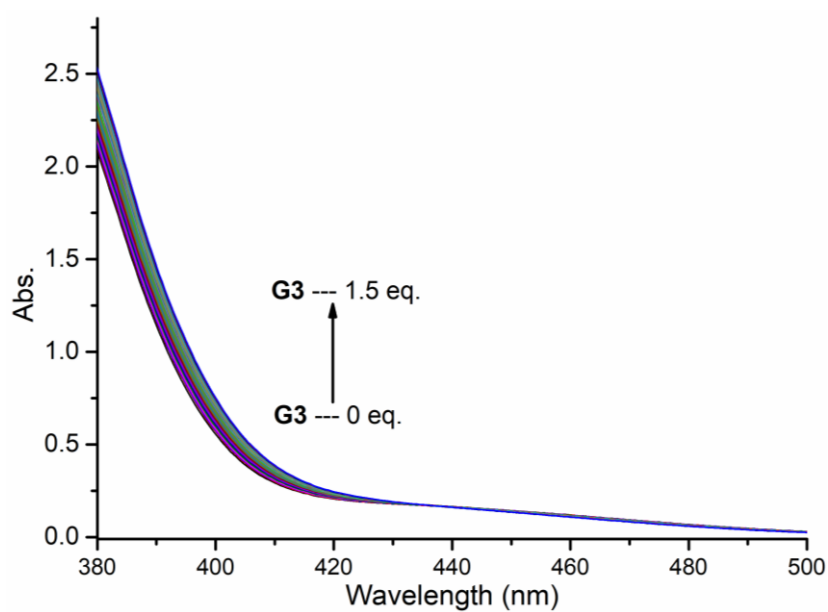

**Figure S28** Stacked UV-vis spectra of **1a** (50 μM) titrated with **G3** from 0 equiv. to 1.5 equiv. in CHCl<sub>3</sub>-CH<sub>3</sub>CN (5:1, v/v, 298 K).

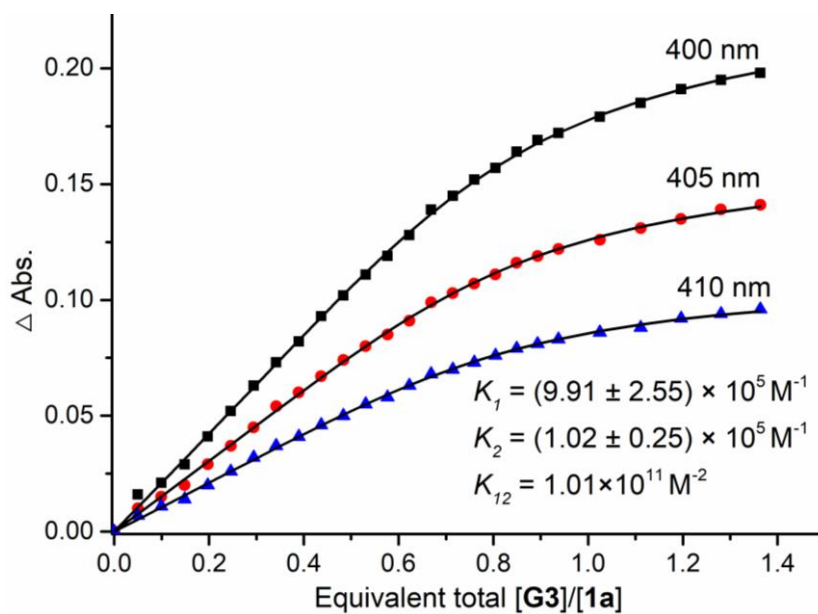

**Figure S29** Curve fitting of the binding constant of **G3**·**1a**<sub>2</sub> in CHCl<sub>3</sub>-CH<sub>3</sub>CN (5:1, v/v, 298 K). The reported binding constant is the average value based on fitting of the absorbance at 400 nm, 405 nm and 410 nm.

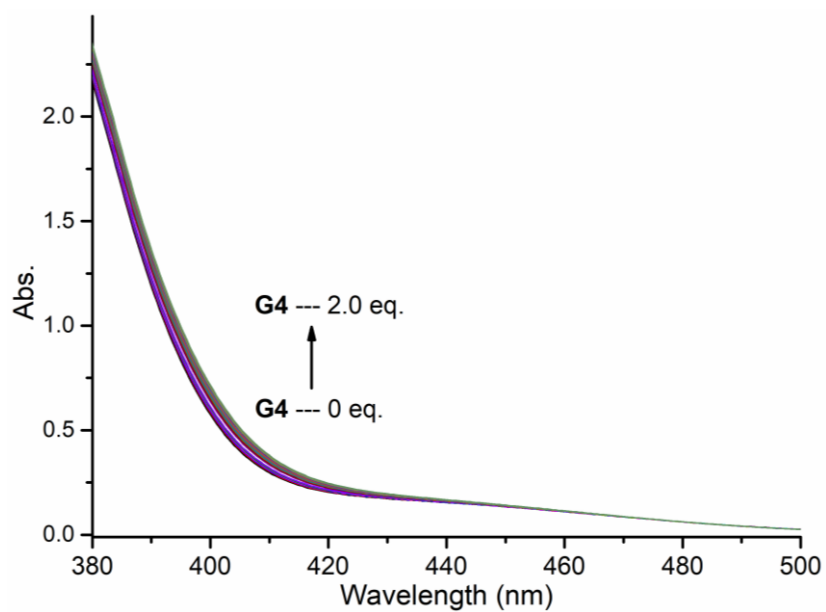

**Figure S30** Stacked UV-vis spectra of **1a** (50  $\mu$ M) titrated with **G4** from 0 equiv. to 2.0 equiv. in  $\text{CHCl}_3\text{-CH}_3\text{CN}$  (5:1, v/v, 298 K).

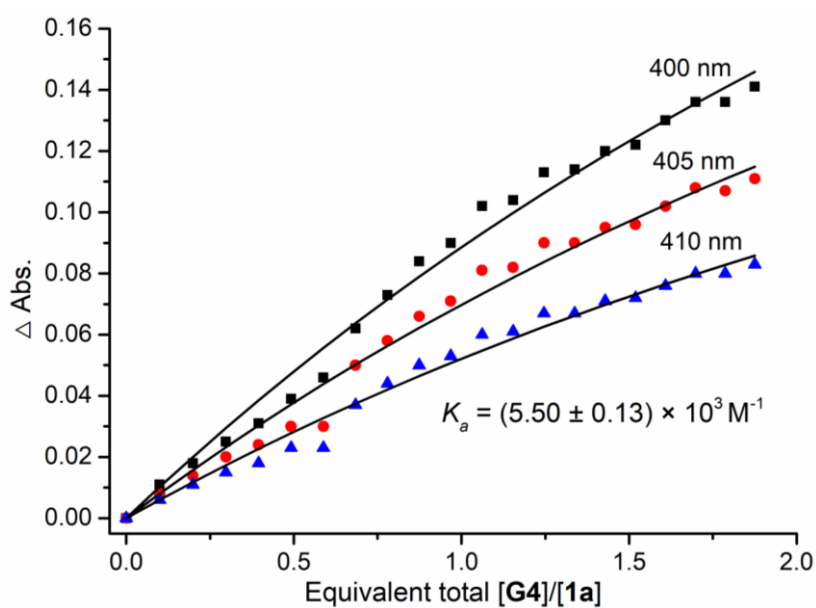

**Figure S31** Curve fitting of the binding constant of **G4-1a** in  $\text{CHCl}_3\text{-CH}_3\text{CN}$  (5:1, v/v, 298 K). The reported binding constant is the average value based on fitting of the absorbance at 400 nm, 405 nm and 410 nm.

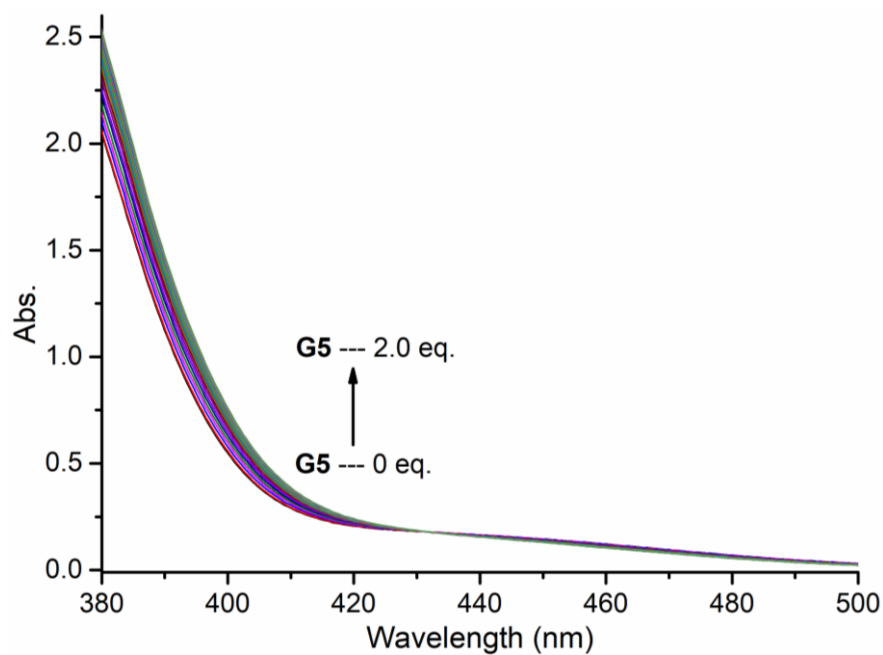

**Figure S32** Stacked UV-vis spectra of **1a** (50  $\mu\text{M}$ ) titrated with **G5** from 0 equiv. to 2.0 equiv. in  $\text{CHCl}_3\text{-CH}_3\text{CN}$  (5:1, v/v 298 K).

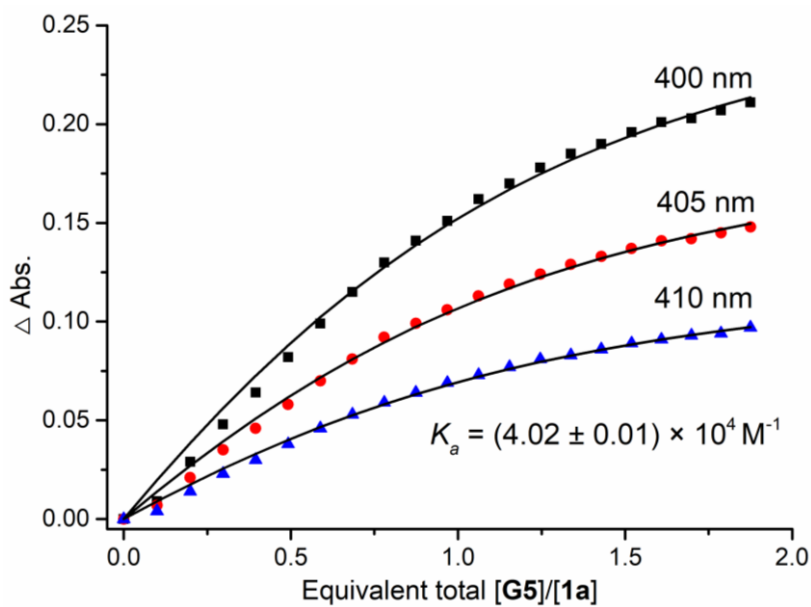

**Figure S33** Curve fitting of the binding constant of **G5** with **1a** in  $\text{CHCl}_3\text{-CH}_3\text{CN}$  (5:1, v/v, 298 K). The reported binding constant is the average value based on fitting of the absorbance at 400 nm, 405 nm and 410 nm.

## Photo-responsiveness of host 1a

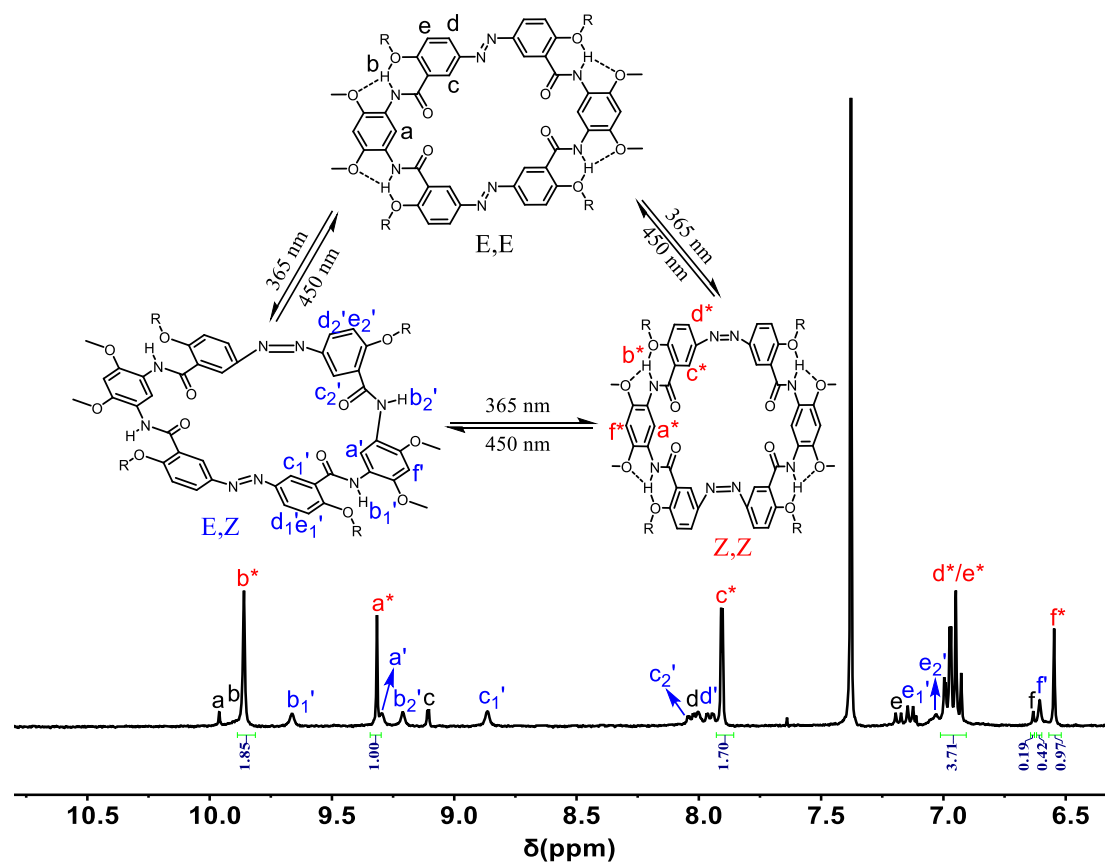

**Figure S34** Partial <sup>1</sup>H-NMR spectrum (400 MHz, CDCl<sub>3</sub>-CD<sub>3</sub>CN, 5:1, v/v, 298 K) of **1a** under UV irradiation for 25 min.

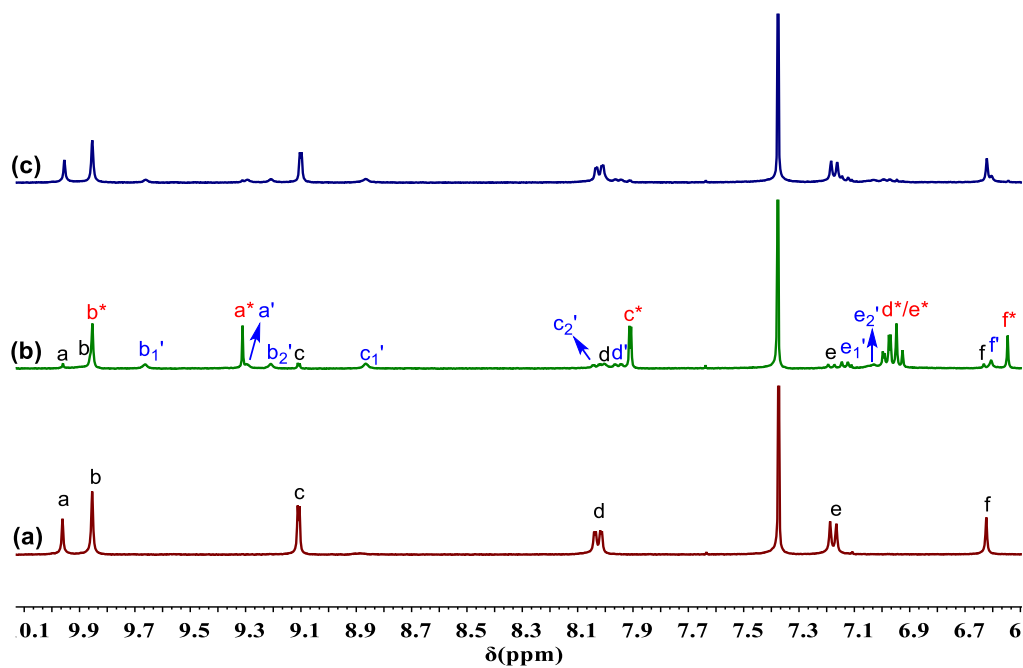

**Figure S35** Stacked <sup>1</sup>H-NMR spectra (400 MHz, CDCl<sub>3</sub>-CD<sub>3</sub>CN, 5:1, v/v, 298 K) of **1a** (a) before and (b) after UV irradiation for 25 min, (c) then under blue light irradiation of (b).

## Photo-responsive binding and release of the guests in G1 $\subset$ 1a<sub>2</sub>

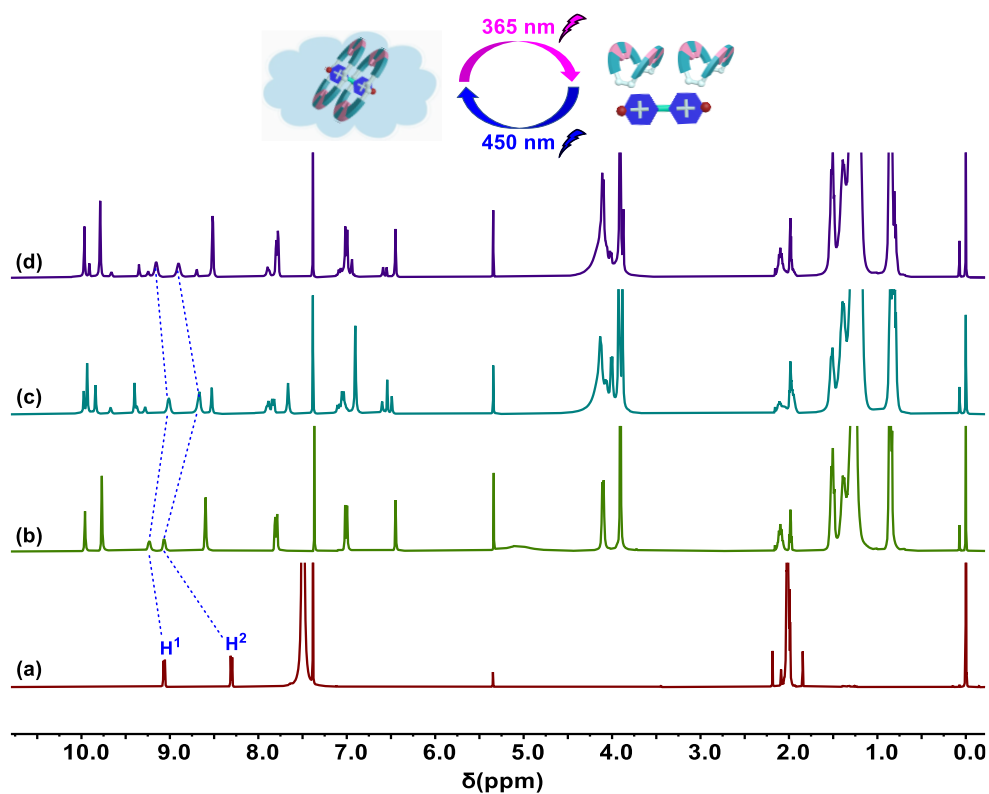

**Figure S36** <sup>1</sup>H-NMR spectra (400 MHz, CDCl<sub>3</sub>-CD<sub>3</sub>CN, 5:1, v/v, 298 K) of (a) free **G1**, (b) complex **G1 $\subset$ 1a<sub>2</sub>**, (c) complex **G1 $\subset$ 1a<sub>2</sub>** after UV irradiation, (d) under blue light irradiation of (c).

## Photo-responsive of host-guest complex G2 $\subset$ 1a<sub>2</sub>, G3 $\subset$ 1a<sub>2</sub>, G4 $\subset$ 1a, and G5 $\subset$ 1a

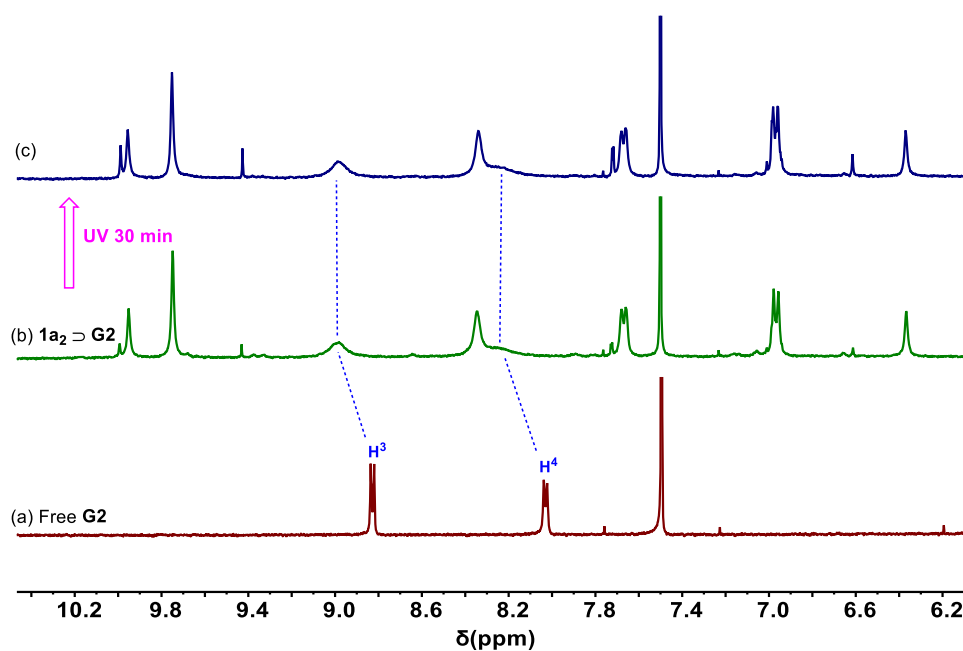

**Figure S37** Partial <sup>1</sup>H NMR spectra (400 MHz, CDCl<sub>3</sub>-CD<sub>3</sub>CN, 1:1, v/v, 298 K) of (a) free **G2**, (b) **1a<sub>2</sub>:G2=2:1** before UV irradiation, and (c) **1a<sub>2</sub>:G2=2:1** after UV irradiation.



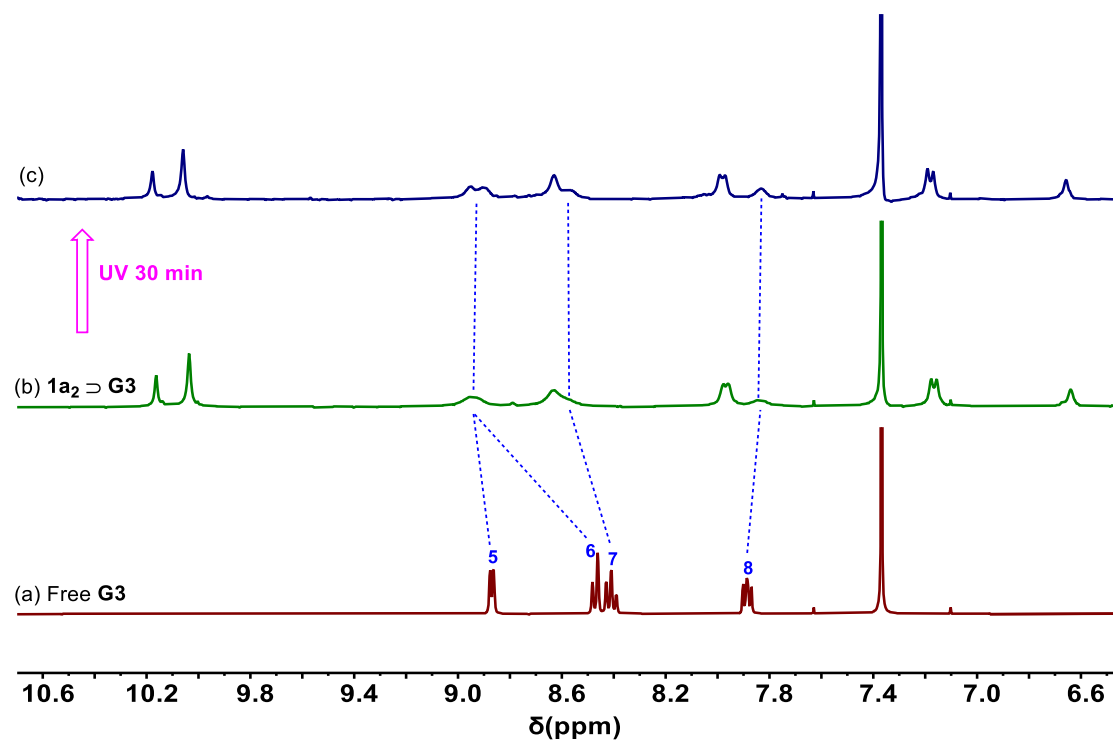

**Figure S38** Partial  $^1\text{H}$  NMR spectra (400 MHz,  $\text{CDCl}_3\text{-CD}_3\text{CN}$ , 5:1, v/v, 298 K) of (a) free G3, (b) 1a:G3=2:1 before UV irradiation, and (c) 1a:G3=2:1 after UV irradiation.

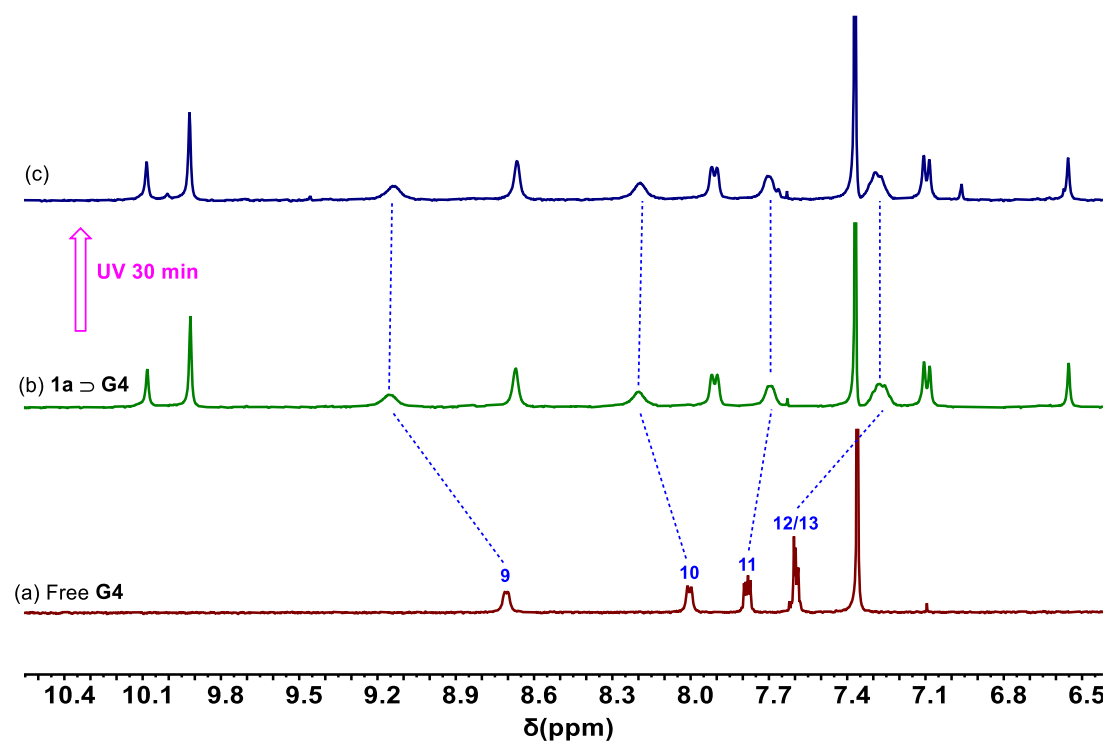

**Figure S39** Partial  $^1\text{H}$  NMR spectra (400 MHz,  $\text{CDCl}_3\text{-CD}_3\text{CN}$ , 5:1, v/v, 298 K) of (a) free G4, (b) 1a:G4=2:1 before UV irradiation, and (c) 1a:G4=2:1 after UV irradiation.

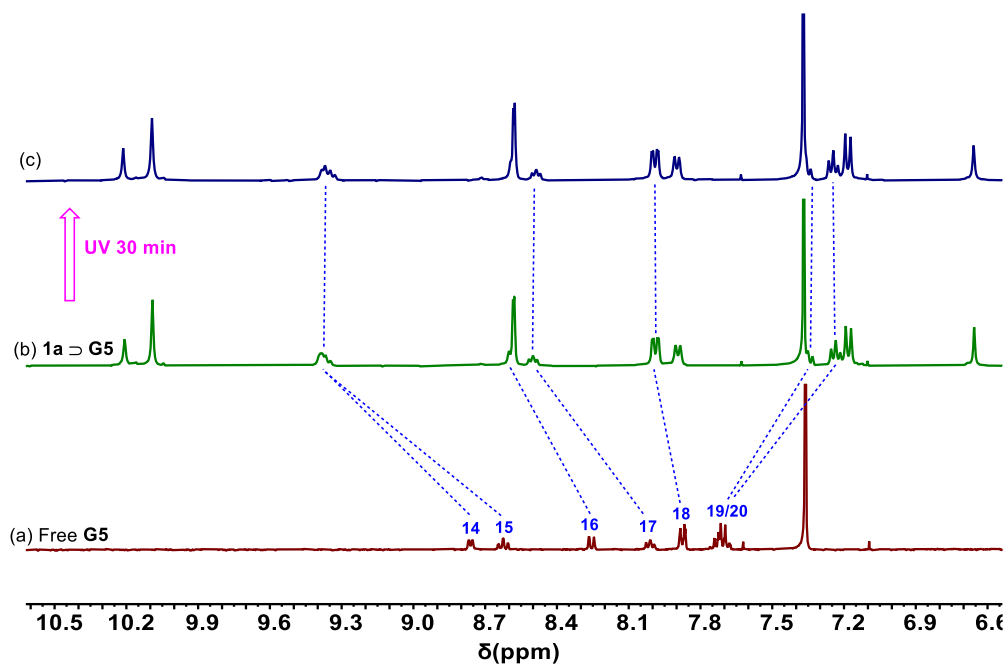

**Figure S40** Partial <sup>1</sup>H NMR spectra (400 MHz, CDCl<sub>3</sub>-CD<sub>3</sub>CN, 5:1, v/v, 298 K) of (a) free G5, (b) 1a:G5=2:1 before UV irradiation, and (c) 1a:G5=2:1 after UV irradiation.

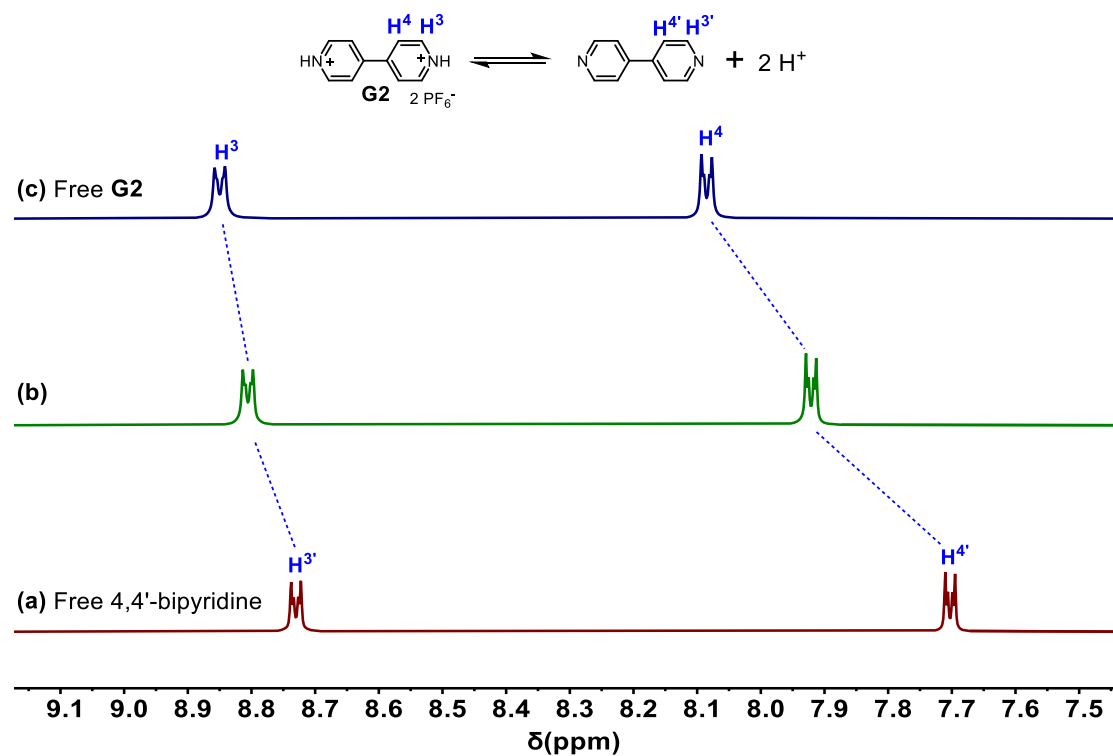

**Figure S41** Partial <sup>1</sup>H NMR spectra (400 MHz, CD<sub>3</sub>CN, 298 K) of (a) free 4,4'-bipyridine, (b) G2 (1.0 mM) and 4,4'-bipyridine (1.0 mM), and (c) G2 (1.0 mM).

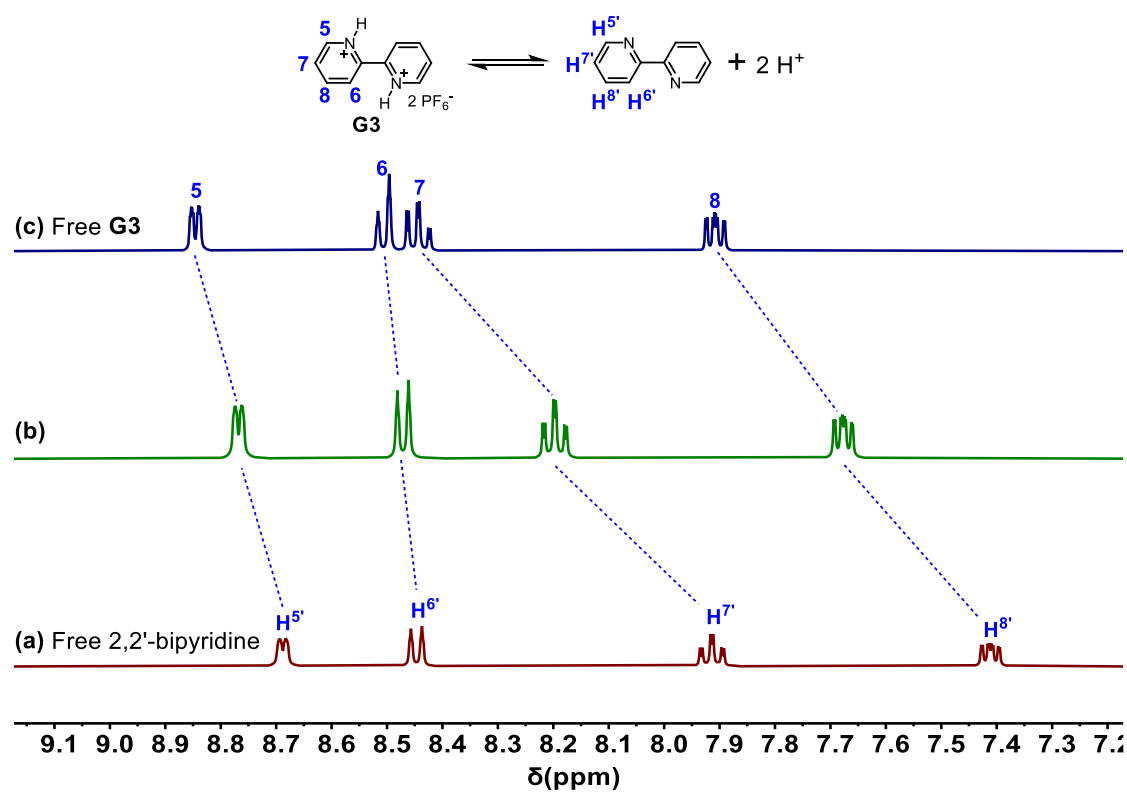

**Figure S42** Partial  $^1\text{H}$  NMR spectra (400 MHz,  $\text{CD}_3\text{CN}$ , 298 K) of (a) free 2,2'-bipyridine, (b) **G3** (1.0 mM) and 4,4'-bipyridine (1.0 mM), and (c) **G3** (1.0 mM).

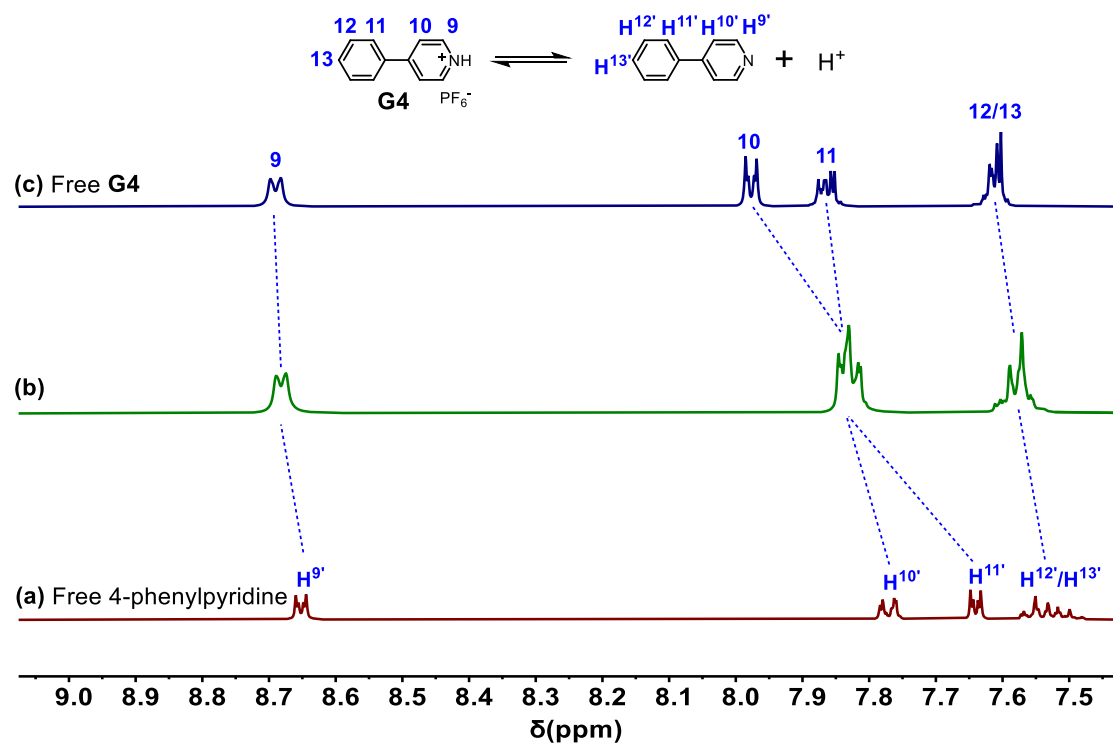

**Figure S43** Partial  $^1\text{H}$  NMR spectra (400 MHz,  $\text{CD}_3\text{CN}$ , 298 K) of (a) free 4-phenylpyridine, (b) **G4** (1.0 mM) and 4-phenylpyridine (1.0 mM), and (c) **G4** (1.0 mM).

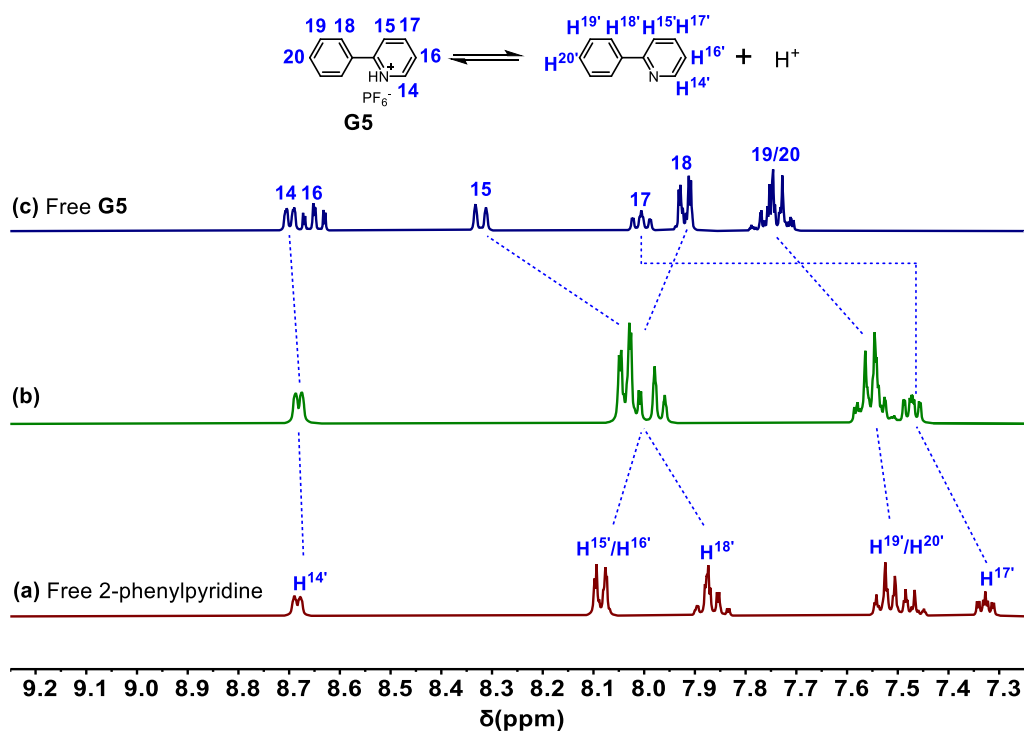

**Figure S44** Partial  $^1\text{H}$  NMR spectra (400 MHz,  $\text{CD}_3\text{CN}$ , 298 K) of (a) free 2-phenylpyridine, (b) **G5** (1.0 mM) and 2-phenylpyridine (1.0 mM), and (c) **G5** (1.0 mM).

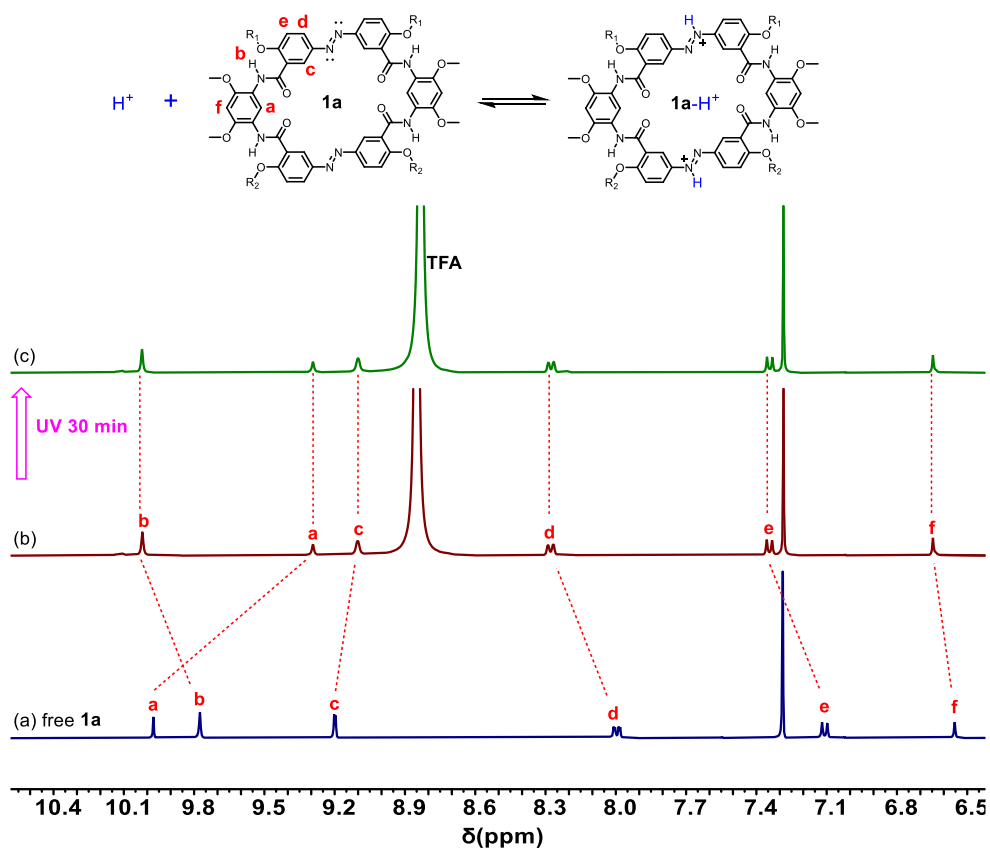

**Figure S45** Partial  $^1\text{H}$  NMR spectra (400 MHz,  $\text{CDCl}_3$ , 298 K) of (a) free **1a** (1.0 mM), (b) **1a** (1.0 mM) + TFA (4.0 mM) before UV irradiation, and (c) **1a** (1.0 mM) + TFA (4.0 mM) after UV irradiation.

## Acid/base responsive of host-guest complexes

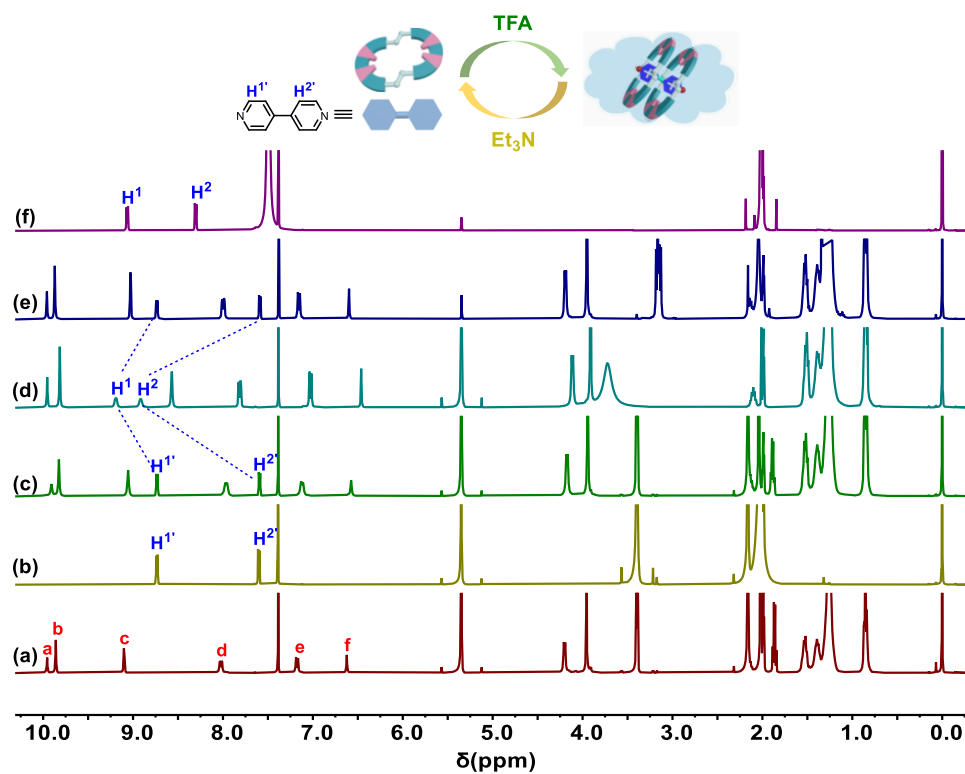

**Figure S46**  $^1\text{H}$  NMR spectra (400 MHz,  $\text{CDCl}_3\text{-CD}_3\text{CN}$ , 5:1, v/v, 298 K) of (a) free **1a**, (b) free 4,4'-bipyridine, (c) 4,4'-bipyridine and 2.0 equiv. of **1a**, (d) to the solution of c was added 4.0 equiv. of TFA, (e) to the solution of (d) was added 6.0 equiv. of  $\text{Et}_3\text{N}$  and (f) free **G1**.  $[\mathbf{1a}]_0 = 2.0$  mM.

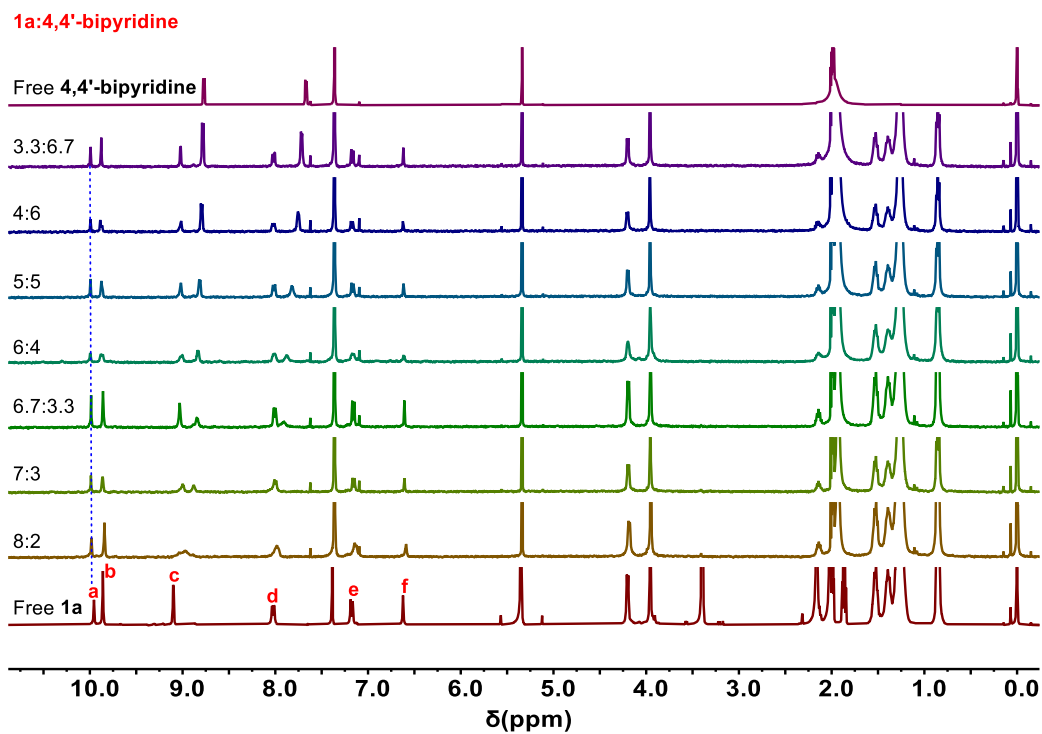

**Figure S47** Stack  $^1\text{H}$  NMR spectra ( $\text{CDCl}_3\text{-CD}_3\text{CN}$ , 5:1, v/v, 400 MHz, 298 K) utilized in the job plot between **1a** and 4,4'-bipyridine.  $[\mathbf{1a}] + [4,4'\text{-bipyridine}] = 1.0$  mM.

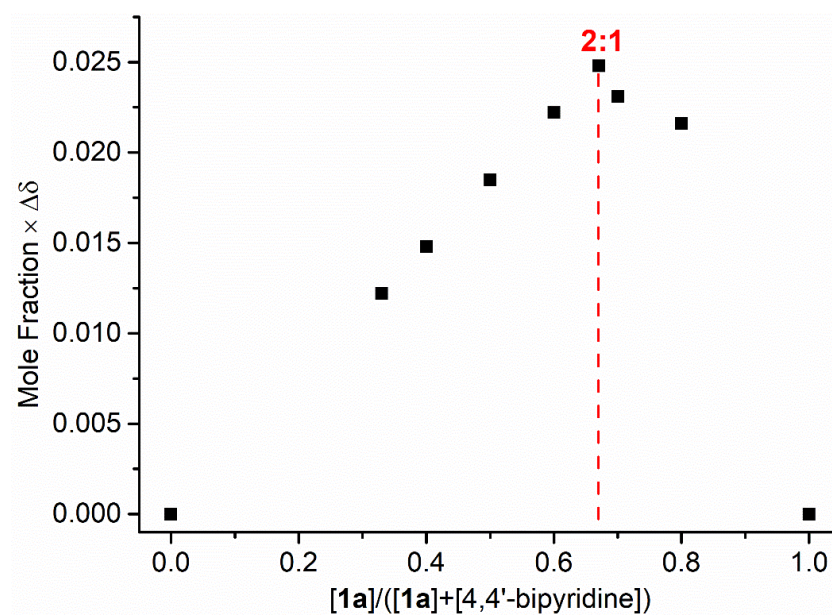

**Figure S48** Job plot showing a peak maximum was reached around 0.67 corresponding to the formation of a 2:1 host-guest complex between **1a** and 4,4'-bipyridine.

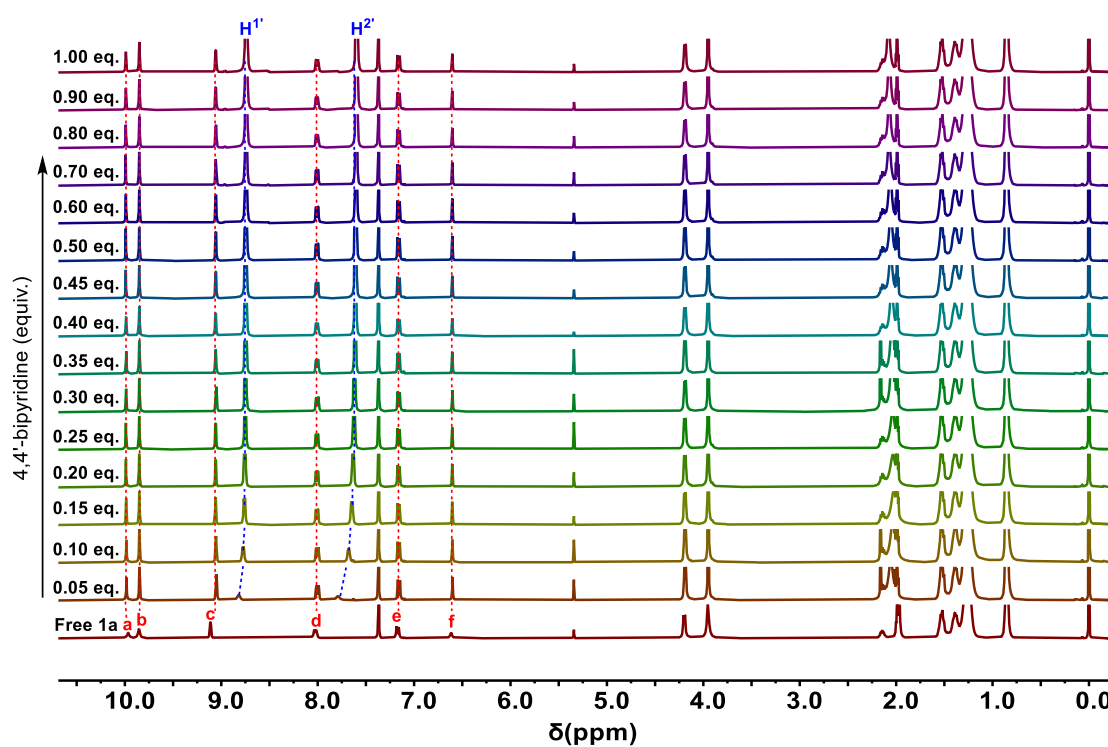

**Figure S49** Stack  $^1\text{H}$  NMR (400 MHz, 298 K,  $\text{CDCl}_3\text{-CD}_3\text{CN}$ , 5:1, v/v) titration spectra of **1a** at a concentration of 2.0 mM with different equiv of 4,4'-bipyridine. The binding constant fitting based on the data failed, indicating that the binding affinity between **1a** and 4,4'-bipyridine is too low to be determined.

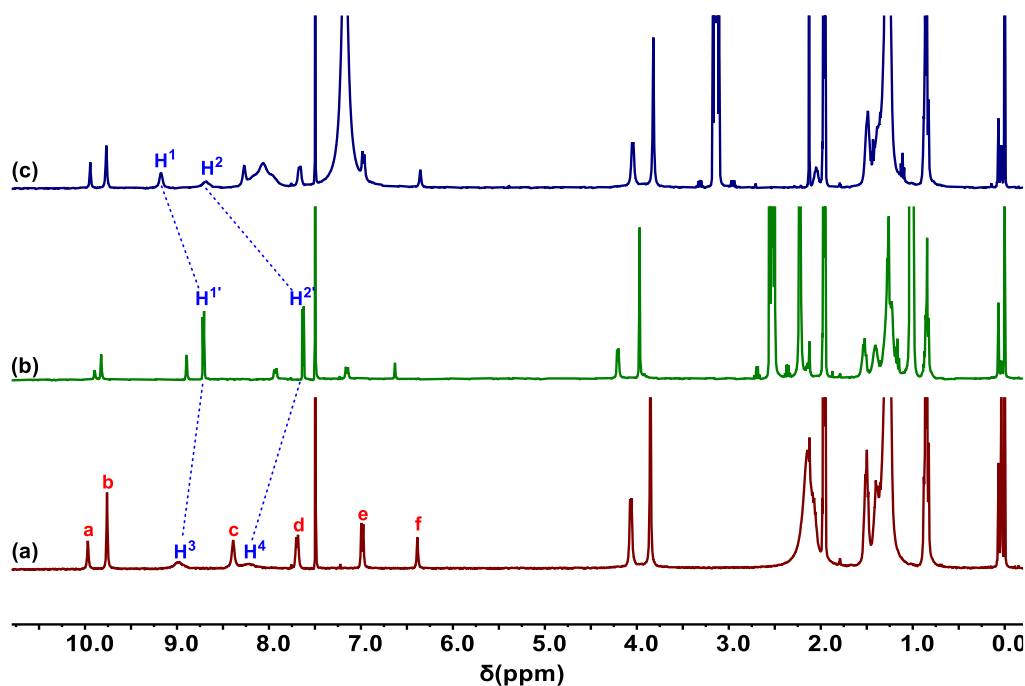

**Figure S50**  $^1\text{H}$  NMR spectra (400 MHz,  $\text{CDCl}_3\text{-CD}_3\text{CN}$ , 1:1, v/v, 298 K) of (a) 2.0 mM **1a** and 1.0 mM **G2**, (b) to the solution of (a) was added 4.0 equiv. of  $\text{Et}_3\text{N}$ , (c) to the solution of (b) was added 6.0 equiv. of TFA.

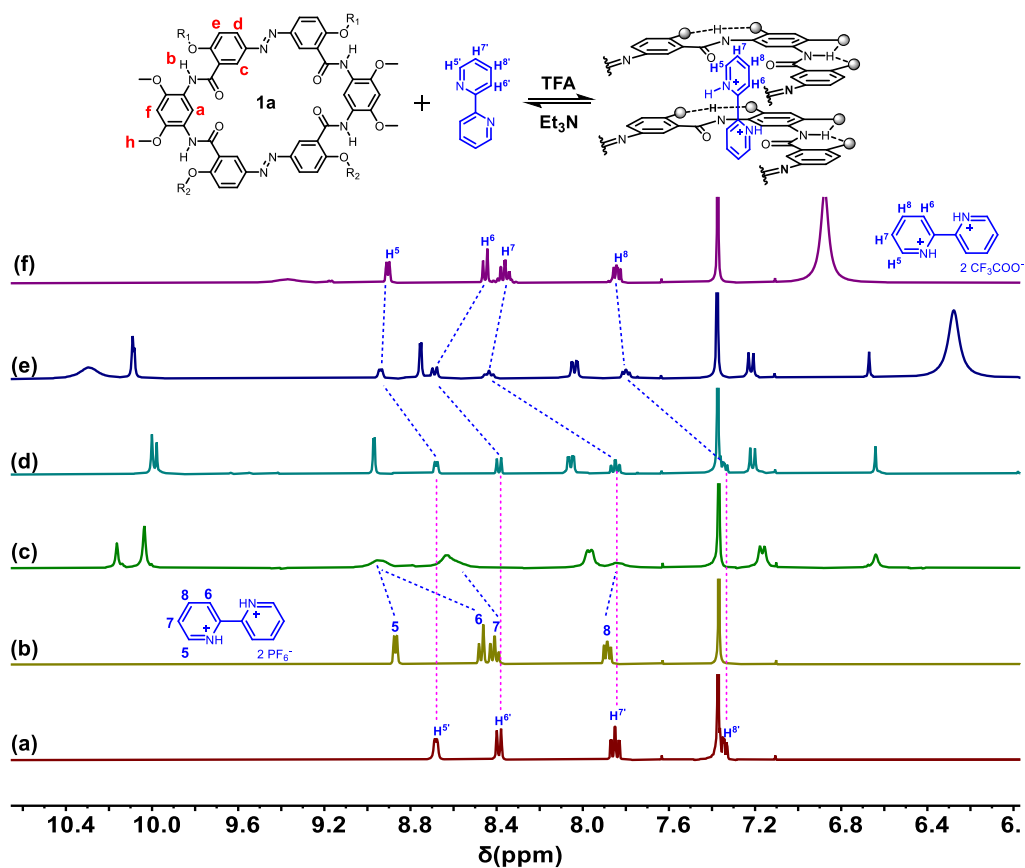

**Figure S51** Partial  $^1\text{H}$  NMR spectra (400 MHz,  $\text{CDCl}_3\text{-CD}_3\text{CN}$ , 5:1, v/v, 298 K) of (a) free 2,2'-bipyridine, (b) free **G3**, (c) **G3** (1 equiv.) and **1a** (2.0 equiv.), (d) the solution of (c) after adding 4.0 equiv. of  $\text{Et}_3\text{N}$ , (e) the solution of (d) after adding 8.0 equiv. of  $\text{CF}_3\text{COOH}$ , and (f) 2,2'-bipyridine (1 equiv.) and  $\text{CF}_3\text{COOH}$  (4 equiv.) [**G3**] $_0$  = 1.0 mM.

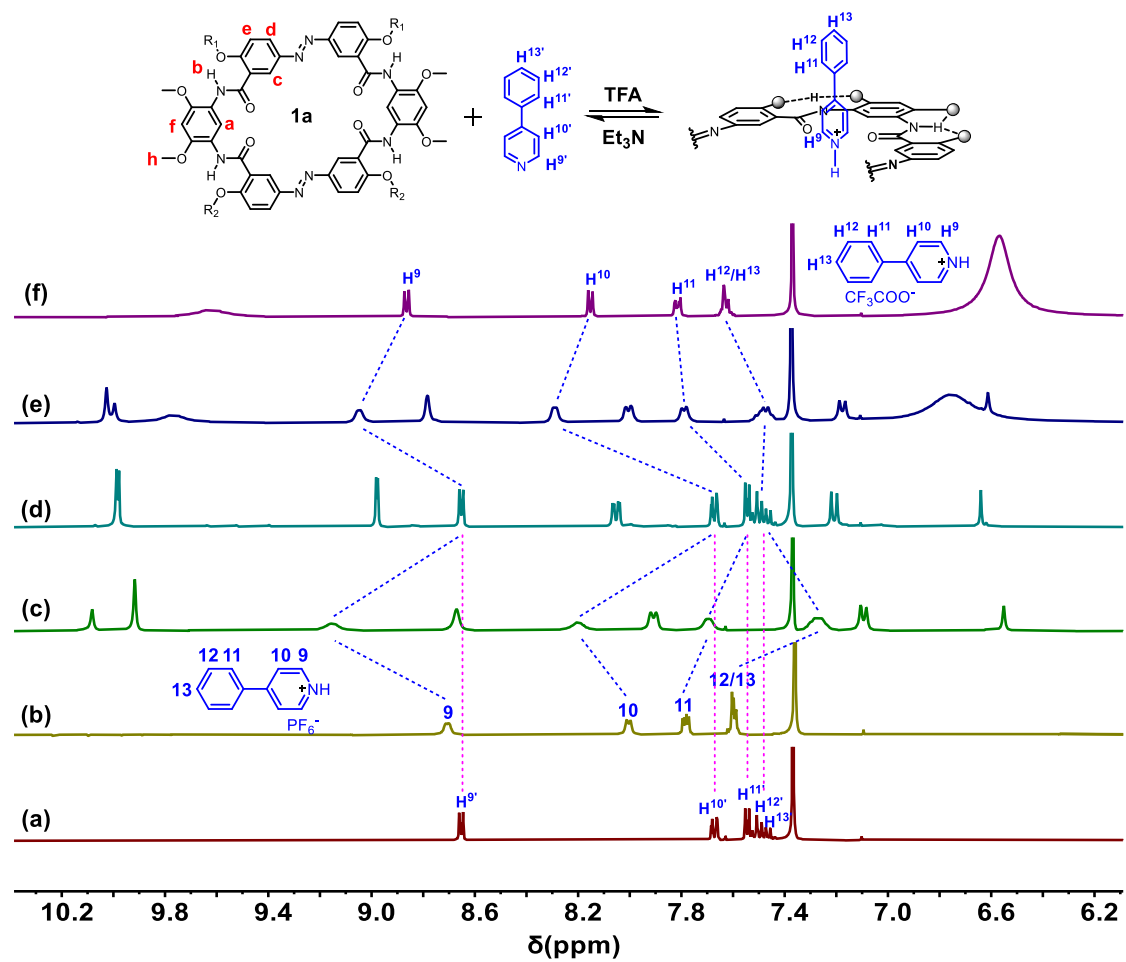

**Figure S52** Partial  $^1\text{H}$  NMR spectra (400 MHz,  $\text{CDCl}_3\text{-CD}_3\text{CN}$ , 5:1, v/v, 298 K) of (a) free 4-phenylpyridine, (b) free **G4**, (c) **G4** (1 equiv.) and **1a** (1.0 equiv.), (d) the solution of (c) after adding 2.0 equiv. of  $\text{Et}_3\text{N}$ , (e) the solution of (d) after adding 4.0 equiv. of  $\text{CF}_3\text{COOH}$ , and (f) 4-phenylbipyridine (1 equiv.) and  $\text{CF}_3\text{COOH}$  (4 equiv.) [**G4**] $_0$  = 1.0 mM.



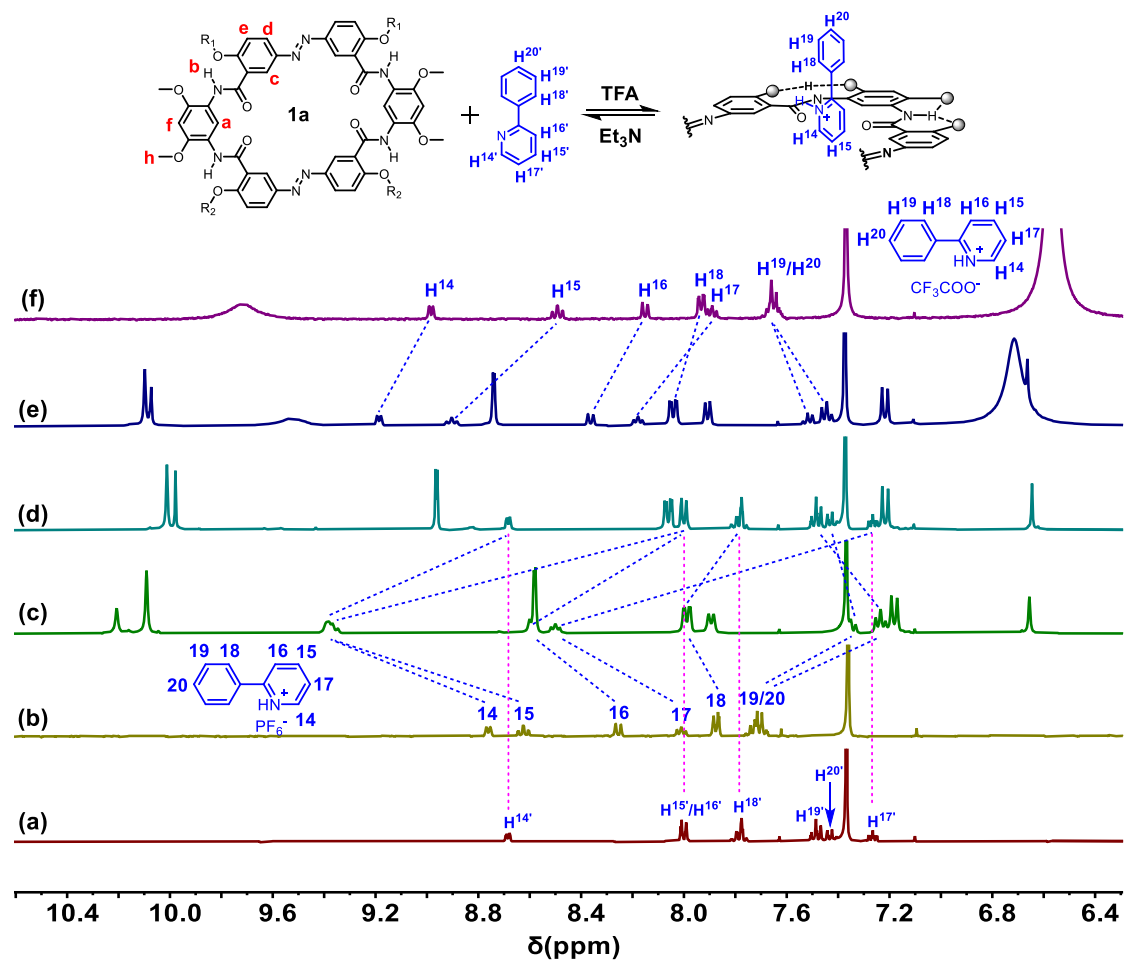

**Figure S53** Partial  $^1\text{H}$  NMR spectra (400 MHz,  $\text{CDCl}_3$ - $\text{CD}_3\text{CN}$ , 5:1, v/v, 298 K) of (a) free 2-phenylpyridine, (b) free  $\text{G5}$ , (c)  $\text{G5}$  (1 equiv.) and  $\mathbf{1a}$  (1.0 equiv.), (d) the solution of (c) after adding 2.0 equiv. of  $\text{Et}_3\text{N}$ , (e) the solution of (d) after adding 4.0 equiv. of  $\text{CF}_3\text{COOH}$ , and (f) 2-phenylbipyridine (1 equiv.) and  $\text{CF}_3\text{COOH}$  (4 equiv.) [ $\text{G5}$ ] $_0$  = 1.0 mM.

## Cation-responsive release of the guest in $G2\subset 1a_2$

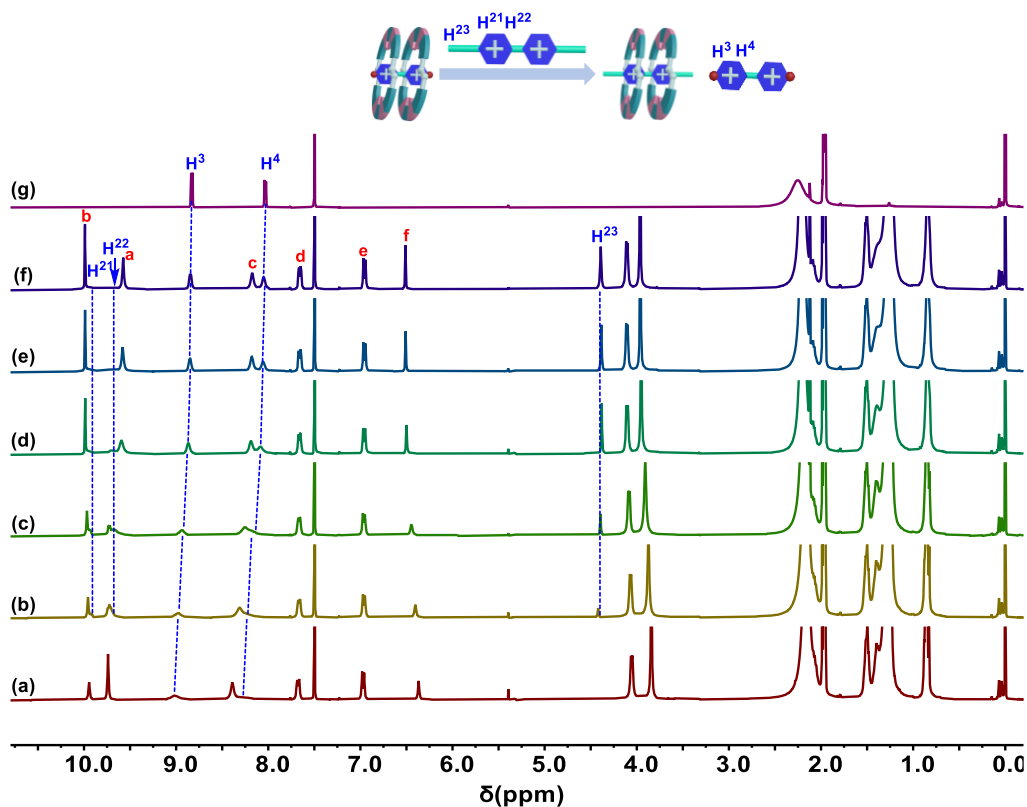

**Figure S54**  $^1\text{H}$  NMR spectra (400 MHz,  $\text{CDCl}_3\text{-CD}_3\text{CN}$ , 1:1, v/v, 298 K) of (a) 2 mM **1a** and 1 mM **G2**, and containing the following concentrations of **G6** (b) 0.2 mM, (c) 0.4 mM, (d) 0.8 mM, (e) 1.0 mM, (f) 1.2 mM, (g) **G2** alone.

## DFT calculation studies

All side chains of **1** are replaced by  $\text{CH}_3$  for simplicity. The geometries of  $G1\subset E,E\text{-}1c_2$ ,  $G1\subset E,Z\text{-}1c_2$ , and  $G1\subset Z,Z\text{-}1c_2$  were fully optimized at the B3LYP(PCM, chloroform)/6-31G (d,p) level of theory with the keyword UAHF method. The contained structures were confirmed without any imaginary frequency. All calculations were performed in Gaussian 09 program package. <sup>[5]</sup>

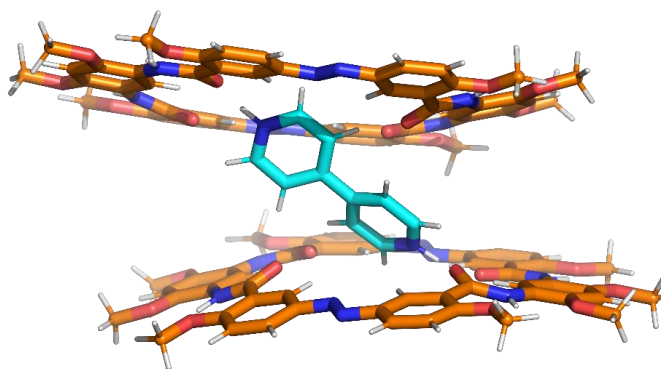

**Figure S55** Optimized structure at the DFT/B3LYP(PCM, chloroform)/6-31G (d,p) level of complex  $G1\subset E,E\text{-}1c_2$ . All peripheral  $R^1$  and  $R^2$  group are replaced by  $\text{CH}_3$  for simplicity.

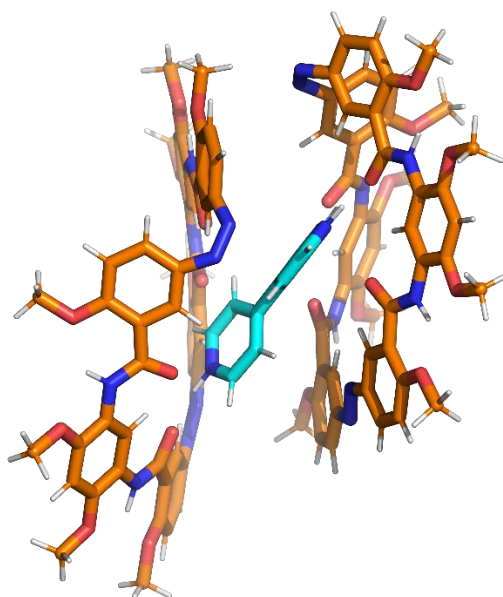

**Figure S56** Optimized structure at the DFT/B3LYP(PCM, chloroform)/6-31G (d,p) level of complex **G1c-E,Z-1c<sub>2</sub>**. All peripheral R<sup>1</sup> and R<sup>2</sup> group are replaced by CH<sub>3</sub> for simplicity.

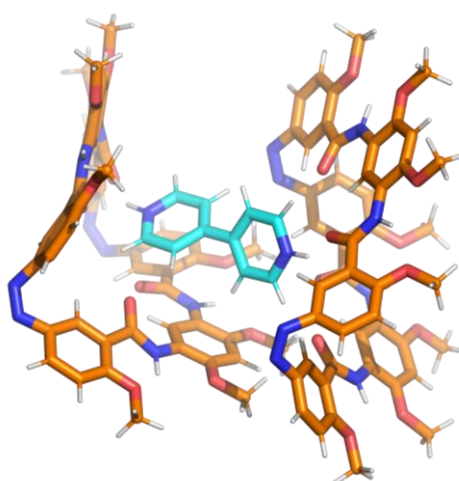

**Figure S57** Optimized structure at the DFT/B3LYP(PCM, chloroform)/6-31G (d,p) level of complex **G1c-Z,Z-1c<sub>2</sub>**. All peripheral R<sup>1</sup> and R<sup>2</sup> group are replaced by CH<sub>3</sub> for simplicity.

Independent gradient model (IGM) analysis is an approach<sup>[6]</sup> based on promolecular density (an electron density model prior to molecule formation) to identify and isolate intermolecular interactions. DFT optimized structures are used as input files. Strong polar attractions, van der Waals contacts, and repulsive forces are visualized as an isosurface with blue, green, and red color, respectively. The binding surface was calculated by Multiwfn 3.8 program<sup>[7]</sup> and visualized using PyMOL.<sup>[8]</sup>

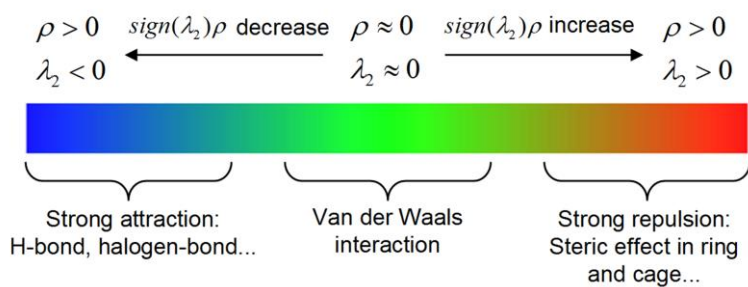

**Figure S58** Color-coded  $\text{sign}(\lambda_2)\rho$  scale bar.

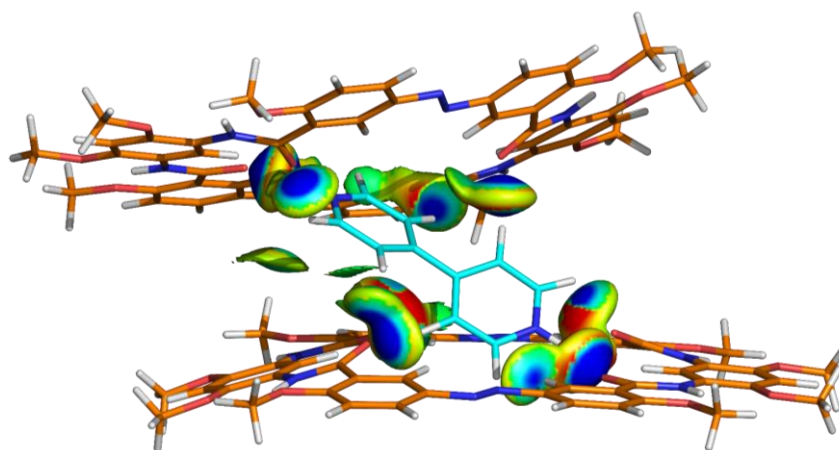

**Figure S59** Visualization of noncovalent interactions in complex **G1**  $\subset$  **1c2**. Independent gradient model (IGM) analysis revealed that the interfacial interaction in **G1**  $\subset$  **1c2** is maintained by C-H $\cdots$ O interaction between macrocycle **1c** and **G1**.

Standard orientation for the optimized structure of E,E-**12**⊃**G1**

| Center Number | Atomic Number | Atomic Type | Coordinates (Angstroms) |           |           |
|---------------|---------------|-------------|-------------------------|-----------|-----------|
|               |               |             | X                       | Y         | Z         |
| 1             | 8             | 0           | -6.070184               | 2.115816  | -2.321806 |
| 2             | 8             | 0           | -3.719345               | 1.530176  | -5.642602 |
| 3             | 8             | 0           | -2.658096               | 4.440859  | -0.688270 |
| 4             | 8             | 0           | 0.000225                | 7.624048  | -1.116171 |
| 5             | 8             | 0           | 1.539225                | 5.301556  | 1.228443  |
| 6             | 8             | 0           | 0.083085                | 1.966253  | 4.487693  |
| 7             | 8             | 0           | -4.338572               | 2.956816  | 2.718782  |
| 8             | 8             | 0           | -2.745065               | -0.307726 | 4.651876  |
| 9             | 8             | 0           | -9.654400               | -3.391415 | 1.082362  |
| 10            | 8             | 0           | -6.955266               | -0.218973 | 0.659458  |
| 11            | 8             | 0           | -7.840656               | -4.106183 | -1.949612 |
| 12            | 8             | 0           | -5.526495               | -1.593837 | -5.438671 |
| 13            | 7             | 0           | -5.698969               | 0.618278  | -4.016089 |
| 14            | 7             | 0           | -4.873952               | 7.641273  | -3.858037 |
| 15            | 7             | 0           | -0.951630               | 5.553997  | 0.345792  |
| 16            | 7             | 0           | -2.400303               | 2.193395  | 3.673842  |
| 17            | 7             | 0           | -8.107122               | 1.093729  | 5.444334  |
| 18            | 7             | 0           | -8.000023               | -1.924747 | -0.451830 |
| 19            | 6             | 0           | -5.637558               | 1.860800  | -3.451668 |
| 20            | 6             | 0           | -5.040384               | 2.964743  | -4.286020 |
| 21            | 6             | 0           | -4.077958               | 2.807524  | -5.312155 |

|    |   |   |            |           |           |
|----|---|---|------------|-----------|-----------|
| 22 | 6 | 0 | -3.530039  | 3.937354  | -5.930352 |
| 23 | 6 | 0 | -3.935446  | 5.216181  | -5.555217 |
| 24 | 6 | 0 | -4.913675  | 5.381751  | -4.569808 |
| 25 | 6 | 0 | -5.464492  | 4.256515  | -3.958229 |
| 26 | 6 | 0 | -3.579765  | 7.524581  | -3.253469 |
| 27 | 6 | 0 | -2.706483  | 8.607288  | -3.412577 |
| 28 | 6 | 0 | -1.493492  | 8.639582  | -2.735000 |
| 29 | 6 | 0 | -1.163557  | 7.626384  | -1.822801 |
| 30 | 6 | 0 | -2.062882  | 6.552372  | -1.604487 |
| 31 | 6 | 0 | -3.246254  | 6.515253  | -2.345957 |
| 32 | 6 | 0 | -1.904022  | 5.420838  | -0.619670 |
| 33 | 6 | 0 | -0.704483  | 4.634577  | 1.389816  |
| 34 | 6 | 0 | 0.618570   | 4.506903  | 1.851055  |
| 35 | 6 | 0 | 0.915497   | 3.615938  | 2.889656  |
| 36 | 6 | 0 | -0.104449  | 2.861071  | 3.474645  |
| 37 | 6 | 0 | -1.440141  | 3.000067  | 3.032773  |
| 38 | 6 | 0 | -1.723451  | 3.896864  | 1.999749  |
| 39 | 6 | 0 | -3.752471  | 2.189722  | 3.489822  |
| 40 | 6 | 0 | -4.549394  | 1.196846  | 4.301726  |
| 41 | 6 | 0 | -4.073356  | -0.036632 | 4.810852  |
| 42 | 6 | 0 | -4.960835  | -0.919186 | 5.439493  |
| 43 | 6 | 0 | -6.305803  | -0.588660 | 5.581894  |
| 44 | 6 | 0 | -6.779184  | 0.643056  | 5.117325  |
| 45 | 6 | 0 | -5.893893  | 1.526264  | 4.499440  |
| 46 | 6 | 0 | -9.148404  | -0.546123 | 4.090074  |
| 47 | 6 | 0 | -10.086051 | -1.572324 | 4.255551  |
| 48 | 6 | 0 | -10.246476 | -2.544661 | 3.275201  |
| 49 | 6 | 0 | -9.520518  | -2.473522 | 2.077474  |
| 50 | 6 | 0 | -8.607971  | -1.406851 | 1.868495  |
| 51 | 6 | 0 | -8.434147  | -0.471505 | 2.892900  |
| 52 | 6 | 0 | -7.786768  | -1.150301 | 0.637272  |
| 53 | 6 | 0 | -7.361265  | -1.819472 | -1.708893 |
| 54 | 6 | 0 | -7.290545  | -2.982575 | -2.498169 |
| 55 | 6 | 0 | -6.687986  | -2.932549 | -3.759392 |
| 56 | 6 | 0 | -6.152975  | -1.732652 | -4.232556 |
| 57 | 6 | 0 | -6.239816  | -0.554709 | -3.456705 |
| 58 | 6 | 0 | -6.862972  | -0.613353 | -2.208029 |
| 59 | 6 | 0 | -2.788367  | 1.320033  | -6.705951 |
| 60 | 6 | 0 | 0.920815   | 8.710929  | -1.261114 |
| 61 | 6 | 0 | 2.899378   | 5.221394  | 1.649033  |
| 62 | 6 | 0 | 1.411516   | 1.717710  | 4.951034  |
| 63 | 6 | 0 | -2.215273  | -1.542856 | 5.139891  |
| 64 | 6 | 0 | -10.600626 | -4.458923 | 1.217823  |
| 65 | 6 | 0 | -7.917085  | -5.287246 | -2.745519 |
| 66 | 6 | 0 | -5.494166  | -2.707810 | -6.328487 |
| 67 | 1 | 0 | -5.262669  | 0.504762  | -4.923916 |
| 68 | 1 | 0 | -0.282242  | 6.307029  | 0.231802  |
| 69 | 1 | 0 | -2.021216  | 1.502611  | 4.310898  |
| 70 | 1 | 0 | -8.625815  | -2.715490 | -0.330172 |
| 71 | 1 | 0 | -2.784967  | 3.831118  | -6.708337 |
| 72 | 1 | 0 | -3.510026  | 6.082754  | -6.050739 |
| 73 | 1 | 0 | -6.217875  | 4.367226  | -3.186704 |
| 74 | 1 | 0 | -2.982674  | 9.419941  | -4.076701 |
| 75 | 1 | 0 | -0.820165  | 9.471168  | -2.897199 |
| 76 | 1 | 0 | -3.917604  | 5.690167  | -2.151873 |
| 77 | 1 | 0 | 1.932454   | 3.507803  | 3.237430  |
| 78 | 1 | 0 | -2.741347  | 4.009018  | 1.668483  |
| 79 | 1 | 0 | -4.610958  | -1.869409 | 5.822284  |
| 80 | 1 | 0 | -6.980300  | -1.279083 | 6.077313  |
| 81 | 1 | 0 | -6.246779  | 2.480292  | 4.124416  |
| 82 | 1 | 0 | -10.683136 | -1.606929 | 5.161077  |
| 83 | 1 | 0 | -10.957738 | -3.344068 | 3.436657  |

|     |   |   |            |           |           |
|-----|---|---|------------|-----------|-----------|
| 84  | 1 | 0 | -7.745306  | 0.340092  | 2.705604  |
| 85  | 1 | 0 | -6.629863  | -3.825102 | -4.365166 |
| 86  | 1 | 0 | -6.964725  | 0.291656  | -1.635240 |
| 87  | 1 | 0 | -3.159857  | 1.737459  | -7.647561 |
| 88  | 1 | 0 | -2.690756  | 0.238787  | -6.799840 |
| 89  | 1 | 0 | 1.285662   | 8.780645  | -2.290529 |
| 90  | 1 | 0 | 0.460714   | 9.657967  | -0.962636 |
| 91  | 1 | 0 | 3.008535   | 5.505888  | 2.702019  |
| 92  | 1 | 0 | 3.447284   | 5.927509  | 1.025011  |
| 93  | 1 | 0 | 1.870987   | 2.632692  | 5.341411  |
| 94  | 1 | 0 | 2.030177   | 1.287792  | 4.157554  |
| 95  | 1 | 0 | -1.146011  | -1.502092 | 4.935285  |
| 96  | 1 | 0 | -2.651600  | -2.394616 | 4.608793  |
| 97  | 1 | 0 | -11.617359 | -4.068875 | 1.321321  |
| 98  | 1 | 0 | -10.353121 | -5.094099 | 2.073554  |
| 99  | 1 | 0 | -8.431472  | -6.027531 | -2.132883 |
| 100 | 1 | 0 | -6.918932  | -5.660501 | -3.001372 |
| 101 | 1 | 0 | -6.506128  | -3.043876 | -6.579341 |
| 102 | 1 | 0 | -4.925917  | -3.542119 | -5.901493 |
| 103 | 1 | 0 | 1.750150   | 8.479595  | -0.594017 |
| 104 | 1 | 0 | 3.298796   | 4.213984  | 1.494686  |
| 105 | 1 | 0 | 1.310057   | 0.996022  | 5.761952  |
| 106 | 1 | 0 | -2.378161  | -1.645815 | 6.217730  |
| 107 | 1 | 0 | -1.812175  | 1.756281  | -6.469030 |
| 108 | 1 | 0 | -4.995226  | -2.355283 | -7.230954 |
| 109 | 1 | 0 | -10.520157 | -5.035512 | 0.297433  |
| 110 | 1 | 0 | -8.488591  | -5.111354 | -3.663535 |
| 111 | 7 | 0 | -9.142968  | 0.500499  | 5.070480  |
| 112 | 7 | 0 | -5.504020  | 6.677193  | -4.344377 |
| 113 | 7 | 0 | -4.383501  | 0.233834  | 0.060835  |
| 114 | 6 | 0 | -3.761947  | -0.959684 | 0.110419  |
| 115 | 6 | 0 | -2.405981  | -1.046482 | -0.134571 |
| 116 | 6 | 0 | -1.683024  | 0.123940  | -0.423926 |
| 117 | 6 | 0 | -2.360988  | 1.349711  | -0.437855 |
| 118 | 6 | 0 | -3.728753  | 1.378885  | -0.199084 |
| 119 | 6 | 0 | -0.232147  | 0.034786  | -0.739206 |
| 120 | 6 | 0 | 0.713464   | 0.886281  | -0.143323 |
| 121 | 6 | 0 | 2.056253   | 0.748268  | -0.461381 |
| 122 | 7 | 0 | 2.430707   | -0.184219 | -1.360440 |
| 123 | 6 | 0 | 1.558905   | -1.019215 | -1.953409 |
| 124 | 6 | 0 | 0.213527   | -0.935850 | -1.648887 |
| 125 | 1 | 0 | -4.380921  | -1.816221 | 0.343500  |
| 126 | 1 | 0 | -1.923178  | -2.013763 | -0.079995 |
| 127 | 1 | 0 | -1.871554  | 2.292209  | -0.650158 |
| 128 | 1 | 0 | -4.308670  | 2.290957  | -0.231245 |
| 129 | 1 | 0 | 0.420966   | 1.631987  | 0.586333  |
| 130 | 1 | 0 | 2.846642   | 1.343468  | -0.014327 |
| 131 | 1 | 0 | 1.979692   | -1.745785 | -2.632273 |
| 132 | 1 | 0 | -0.477434  | -1.612578 | -2.135176 |
| 133 | 8 | 0 | 4.517281   | -1.171819 | -2.741725 |
| 134 | 8 | 0 | 8.621268   | -1.122707 | -2.969327 |
| 135 | 8 | 0 | 4.640764   | 1.956701  | 1.037496  |
| 136 | 8 | 0 | 7.480877   | 4.729718  | 2.312380  |
| 137 | 8 | 0 | 7.683035   | 2.304728  | 4.816725  |
| 138 | 8 | 0 | 5.383572   | -1.707719 | 6.372039  |
| 139 | 8 | 0 | 2.352139   | -0.800747 | 2.739331  |
| 140 | 8 | 0 | 3.543159   | -4.315286 | 4.663319  |
| 141 | 8 | 0 | 1.091854   | -7.865562 | -2.170714 |
| 142 | 8 | 0 | 2.071698   | -3.859205 | -1.511469 |
| 143 | 8 | 0 | 4.291491   | -7.609747 | -3.660591 |
| 144 | 8 | 0 | 7.680454   | -4.257241 | -4.708598 |
| 145 | 7 | 0 | 6.301273   | -2.412529 | -3.446016 |

|     |   |   |           |           |           |
|-----|---|---|-----------|-----------|-----------|
| 146 | 7 | 0 | 5.731606  | 4.630988  | -3.003952 |
| 147 | 7 | 0 | 6.205956  | 2.367883  | 2.654820  |
| 148 | 7 | 0 | 3.827315  | -1.684058 | 4.252915  |
| 149 | 7 | 0 | -1.464679 | -3.926382 | 2.195275  |
| 150 | 7 | 0 | 2.876350  | -5.829485 | -2.346227 |
| 151 | 6 | 0 | 5.711615  | -1.246562 | -3.096886 |
| 152 | 6 | 0 | 6.542572  | 0.000706  | -3.198683 |
| 153 | 6 | 0 | 7.955725  | 0.057926  | -3.097113 |
| 154 | 6 | 0 | 8.604772  | 1.298586  | -3.129780 |
| 155 | 6 | 0 | 7.875952  | 2.475164  | -3.264725 |
| 156 | 6 | 0 | 6.483370  | 2.430022  | -3.397984 |
| 157 | 6 | 0 | 5.837752  | 1.194911  | -3.388498 |
| 158 | 6 | 0 | 6.251426  | 4.608504  | -1.665920 |
| 159 | 6 | 0 | 7.047734  | 5.670234  | -1.227119 |
| 160 | 6 | 0 | 7.485523  | 5.712614  | 0.093331  |
| 161 | 6 | 0 | 7.084079  | 4.730271  | 1.011046  |
| 162 | 6 | 0 | 6.205801  | 3.695856  | 0.598437  |
| 163 | 6 | 0 | 5.819618  | 3.655912  | -0.742031 |
| 164 | 6 | 0 | 5.612676  | 2.605752  | 1.457200  |
| 165 | 6 | 0 | 5.926971  | 1.344663  | 3.584537  |
| 166 | 6 | 0 | 6.748968  | 1.310132  | 4.731876  |
| 167 | 6 | 0 | 6.587785  | 0.302147  | 5.683622  |
| 168 | 6 | 0 | 5.604056  | -0.673300 | 5.506367  |
| 169 | 6 | 0 | 4.762698  | -0.636487 | 4.374844  |
| 170 | 6 | 0 | 4.935315  | 0.371799  | 3.421605  |
| 171 | 6 | 0 | 2.724420  | -1.738687 | 3.455525  |
| 172 | 6 | 0 | 1.927773  | -3.024968 | 3.481682  |
| 173 | 6 | 0 | 2.341102  | -4.268985 | 4.025483  |
| 174 | 6 | 0 | 1.517373  | -5.396150 | 3.899457  |
| 175 | 6 | 0 | 0.298031  | -5.313595 | 3.238411  |
| 176 | 6 | 0 | -0.133723 | -4.088580 | 2.716053  |
| 177 | 6 | 0 | 0.671147  | -2.959795 | 2.869906  |
| 178 | 6 | 0 | -1.092113 | -5.509456 | 0.483564  |
| 179 | 6 | 0 | -1.558005 | -6.787095 | 0.156931  |
| 180 | 6 | 0 | -0.825670 | -7.597124 | -0.706052 |
| 181 | 6 | 0 | 0.348118  | -7.120468 | -1.309796 |
| 182 | 6 | 0 | 0.787406  | -5.798335 | -1.048775 |
| 183 | 6 | 0 | 0.059743  | -5.027861 | -0.140446 |
| 184 | 6 | 0 | 1.964439  | -5.083560 | -1.667046 |
| 185 | 6 | 0 | 4.071742  | -5.384077 | -2.946528 |
| 186 | 6 | 0 | 4.828451  | -6.354168 | -3.639191 |
| 187 | 6 | 0 | 6.040856  | -6.007176 | -4.238738 |
| 188 | 6 | 0 | 6.506781  | -4.692203 | -4.162932 |
| 189 | 6 | 0 | 5.751688  | -3.713324 | -3.484587 |
| 190 | 6 | 0 | 4.548038  | -4.071637 | -2.874259 |
| 191 | 6 | 0 | 10.046577 | -1.117832 | -2.837251 |
| 192 | 6 | 0 | 8.381844  | 5.737831  | 2.783843  |
| 193 | 6 | 0 | 8.559204  | 2.330617  | 5.941609  |
| 194 | 6 | 0 | 6.229081  | -1.838489 | 7.512868  |
| 195 | 6 | 0 | 3.997007  | -5.543736 | 5.240594  |
| 196 | 6 | 0 | 0.691550  | -9.203457 | -2.486448 |
| 197 | 6 | 0 | 5.008828  | -8.654952 | -4.314336 |
| 198 | 6 | 0 | 8.520794  | -5.197224 | -5.376046 |
| 199 | 1 | 0 | 7.275193  | -2.358453 | -3.723957 |
| 200 | 1 | 0 | 6.964491  | 2.989250  | 2.917612  |
| 201 | 1 | 0 | 4.010612  | -2.493795 | 4.834754  |
| 202 | 1 | 0 | 2.675727  | -6.818167 | -2.454773 |
| 203 | 1 | 0 | 9.682624  | 1.354722  | -3.050256 |
| 204 | 1 | 0 | 8.394974  | 3.427047  | -3.293629 |
| 205 | 1 | 0 | 4.761539  | 1.148229  | -3.508027 |
| 206 | 1 | 0 | 7.343372  | 6.446743  | -1.925174 |
| 207 | 1 | 0 | 8.129995  | 6.523068  | 0.408166  |

|     |   |   |           |           |           |
|-----|---|---|-----------|-----------|-----------|
| 208 | 1 | 0 | 5.145471  | 2.864421  | -1.039261 |
| 209 | 1 | 0 | 7.224803  | 0.275108  | 6.555484  |
| 210 | 1 | 0 | 4.302907  | 0.396535  | 2.551652  |
| 211 | 1 | 0 | 1.825525  | -6.346615 | 4.315193  |
| 212 | 1 | 0 | -0.326716 | -6.195667 | 3.152313  |
| 213 | 1 | 0 | 0.352811  | -2.001224 | 2.476526  |
| 214 | 1 | 0 | -2.480197 | -7.153207 | 0.596667  |
| 215 | 1 | 0 | -1.183929 | -8.595389 | -0.921976 |
| 216 | 1 | 0 | 0.409454  | -4.019644 | 0.039360  |
| 217 | 1 | 0 | 6.617393  | -6.755074 | -4.763180 |
| 218 | 1 | 0 | 3.982287  | -3.334559 | -2.335927 |
| 219 | 1 | 0 | 10.524126 | -0.682974 | -3.720948 |
| 220 | 1 | 0 | 10.333439 | -2.164479 | -2.744145 |
| 221 | 1 | 0 | 9.327270  | 5.708825  | 2.233406  |
| 222 | 1 | 0 | 7.933430  | 6.732648  | 2.703747  |
| 223 | 1 | 0 | 8.000934  | 2.447926  | 6.877052  |
| 224 | 1 | 0 | 9.206523  | 3.195391  | 5.796778  |
| 225 | 1 | 0 | 6.144251  | -0.968045 | 8.172960  |
| 226 | 1 | 0 | 7.275927  | -1.974472 | 7.219091  |
| 227 | 1 | 0 | 4.963455  | -5.314321 | 5.687392  |
| 228 | 1 | 0 | 4.120471  | -6.314918 | 4.474255  |
| 229 | 1 | 0 | -0.288972 | -9.214410 | -2.972204 |
| 230 | 1 | 0 | 0.671079  | -9.830032 | -1.589429 |
| 231 | 1 | 0 | 4.402583  | -9.552710 | -4.194727 |
| 232 | 1 | 0 | 5.989218  | -8.813222 | -3.851600 |
| 233 | 1 | 0 | 8.018471  | -5.628891 | -6.248769 |
| 234 | 1 | 0 | 8.835887  | -5.998710 | -4.698683 |
| 235 | 1 | 0 | 8.559195  | 5.499661  | 3.831646  |
| 236 | 1 | 0 | 9.170337  | 1.422549  | 5.990213  |
| 237 | 1 | 0 | 5.882134  | -2.725955 | 8.041864  |
| 238 | 1 | 0 | 3.307032  | -5.893637 | 6.014896  |
| 239 | 1 | 0 | 10.354000 | -0.571198 | -1.940428 |
| 240 | 1 | 0 | 9.394475  | -4.634977 | -5.704846 |
| 241 | 1 | 0 | 1.446511  | -9.576035 | -3.177428 |
| 242 | 1 | 0 | 5.136469  | -8.441636 | -5.381291 |
| 243 | 7 | 0 | -1.922825 | -4.645658 | 1.275284  |
| 244 | 7 | 0 | 5.737221  | 3.615604  | -3.736436 |
| 245 | 1 | 0 | -5.417838 | 0.218867  | 0.224743  |
| 246 | 1 | 0 | 3.419720  | -0.306354 | -1.652251 |

Standard orientation for the optimized structure of E,Z-1<sub>2</sub>DG1

| Center<br>Number | Atomic<br>Number | Atomic<br>Type | Coordinates (Angstroms) |           |           |
|------------------|------------------|----------------|-------------------------|-----------|-----------|
|                  |                  |                | X                       | Y         | Z         |
| 1                | 8                | 0              | 5.808305                | -1.858702 | -0.633240 |
| 2                | 8                | 0              | 9.845038                | -2.699271 | 0.107395  |
| 3                | 8                | 0              | 2.641706                | 2.903550  | -0.015122 |
| 4                | 8                | 0              | 5.924159                | 4.985663  | -1.180328 |
| 5                | 8                | 0              | 3.076156                | 7.574491  | -1.321870 |
| 6                | 8                | 0              | -1.381533               | 6.906195  | -3.212987 |
| 7                | 8                | 0              | -0.704212               | 2.322891  | -1.666438 |
| 8                | 8                | 0              | -3.823129               | 4.071313  | -3.720079 |
| 9                | 8                | 0              | 1.938973                | -5.894687 | -5.707238 |
| 10               | 8                | 0              | 3.031005                | -3.021820 | -2.848726 |
| 11               | 8                | 0              | 5.386212                | -6.708566 | -4.954401 |
| 12               | 8                | 0              | 9.031870                | -5.210640 | -2.074757 |
| 13               | 7                | 0              | 7.548653                | -3.242171 | -1.150796 |
| 14               | 7                | 0              | 6.218063                | 1.618316  | 3.259612  |



|    |   |   |           |           |           |
|----|---|---|-----------|-----------|-----------|
| 15 | 7 | 0 | 3.215698  | 5.027113  | -0.661155 |
| 16 | 7 | 0 | -1.277334 | 4.327559  | -2.614657 |
| 17 | 7 | 0 | -2.230180 | -1.132556 | -4.990094 |
| 18 | 7 | 0 | 3.846928  | -4.752242 | -4.094617 |
| 19 | 6 | 0 | 6.981607  | -2.235255 | -0.443930 |
| 20 | 6 | 0 | 7.811164  | -1.580854 | 0.631905  |
| 21 | 6 | 0 | 9.175593  | -1.843525 | 0.925819  |
| 22 | 6 | 0 | 9.783027  | -1.238946 | 2.035609  |
| 23 | 6 | 0 | 9.057354  | -0.393429 | 2.865362  |
| 24 | 6 | 0 | 7.733876  | -0.067210 | 2.551334  |
| 25 | 6 | 0 | 7.130239  | -0.664149 | 1.442727  |
| 26 | 6 | 0 | 6.219024  | 2.314513  | 2.006521  |
| 27 | 6 | 0 | 7.389411  | 2.805491  | 1.411700  |
| 28 | 6 | 0 | 7.310741  | 3.699122  | 0.348068  |
| 29 | 6 | 0 | 6.065453  | 4.098941  | -0.158553 |
| 30 | 6 | 0 | 4.876466  | 3.572228  | 0.402237  |
| 31 | 6 | 0 | 4.979189  | 2.714437  | 1.499350  |
| 32 | 6 | 0 | 3.481251  | 3.805268  | -0.122869 |
| 33 | 6 | 0 | 2.017583  | 5.476282  | -1.259282 |
| 34 | 6 | 0 | 1.967929  | 6.833273  | -1.637851 |
| 35 | 6 | 0 | 0.838897  | 7.338516  | -2.286457 |
| 36 | 6 | 0 | -0.242341 | 6.498506  | -2.566631 |
| 37 | 6 | 0 | -0.203122 | 5.139978  | -2.193256 |
| 38 | 6 | 0 | 0.924567  | 4.649415  | -1.526264 |
| 39 | 6 | 0 | -1.400864 | 2.977525  | -2.448443 |
| 40 | 6 | 0 | -2.351272 | 2.254488  | -3.373376 |
| 41 | 6 | 0 | -3.508260 | 2.779789  | -4.004718 |
| 42 | 6 | 0 | -4.255694 | 1.971108  | -4.873789 |
| 43 | 6 | 0 | -3.837727 | 0.672853  | -5.165895 |
| 44 | 6 | 0 | -2.681510 | 0.152848  | -4.576614 |
| 45 | 6 | 0 | -1.975439 | 0.949872  | -3.665262 |
| 46 | 6 | 0 | -0.525058 | -2.657640 | -4.799380 |
| 47 | 6 | 0 | -0.963098 | -3.610423 | -5.734475 |
| 48 | 6 | 0 | -0.152450 | -4.698630 | -6.034743 |
| 49 | 6 | 0 | 1.110470  | -4.855437 | -5.428095 |
| 50 | 6 | 0 | 1.561680  | -3.905640 | -4.479667 |
| 51 | 6 | 0 | 0.716923  | -2.837640 | -4.187657 |
| 52 | 6 | 0 | 2.873414  | -3.870734 | -3.736037 |
| 53 | 6 | 0 | 5.148979  | -4.836223 | -3.558125 |
| 54 | 6 | 0 | 5.964173  | -5.886835 | -4.029016 |
| 55 | 6 | 0 | 7.269611  | -6.031573 | -3.553553 |
| 56 | 6 | 0 | 7.773168  | -5.140286 | -2.602751 |
| 57 | 6 | 0 | 6.966773  | -4.086000 | -2.123812 |
| 58 | 6 | 0 | 5.667979  | -3.941358 | -2.616699 |
| 59 | 6 | 0 | 11.209459 | -3.035993 | 0.383280  |
| 60 | 6 | 0 | 7.092525  | 5.525651  | -1.805219 |
| 61 | 6 | 0 | 3.140993  | 8.928384  | -1.762248 |
| 62 | 6 | 0 | -1.353192 | 8.144974  | -3.920818 |
| 63 | 6 | 0 | -4.978108 | 4.659118  | -4.328396 |
| 64 | 6 | 0 | 1.554097  | -6.875796 | -6.677693 |
| 65 | 6 | 0 | 6.156054  | -7.775203 | -5.504552 |
| 66 | 6 | 0 | 9.900262  | -6.254420 | -2.510580 |
| 67 | 1 | 0 | 8.516675  | -3.456942 | -0.928330 |
| 68 | 1 | 0 | 3.990951  | 5.674605  | -0.731246 |
| 69 | 1 | 0 | -1.961670 | 4.784095  | -3.207047 |
| 70 | 1 | 0 | 3.616716  | -5.435703 | -4.807883 |
| 71 | 1 | 0 | 10.817223 | -1.450288 | 2.273929  |
| 72 | 1 | 0 | 9.518502  | 0.026081  | 3.753743  |
| 73 | 1 | 0 | 6.091481  | -0.463604 | 1.215095  |
| 74 | 1 | 0 | 8.361628  | 2.527440  | 1.802522  |
| 75 | 1 | 0 | 8.226189  | 4.087979  | -0.079282 |
| 76 | 1 | 0 | 4.069624  | 2.350452  | 1.962493  |

|     |   |   |            |           |           |
|-----|---|---|------------|-----------|-----------|
| 77  | 1 | 0 | 0.802905   | 8.378078  | -2.579342 |
| 78  | 1 | 0 | 0.958851   | 3.617113  | -1.230721 |
| 79  | 1 | 0 | -5.152379  | 2.355502  | -5.342745 |
| 80  | 1 | 0 | -4.396443  | 0.062454  | -5.868320 |
| 81  | 1 | 0 | -1.082657  | 0.555615  | -3.201728 |
| 82  | 1 | 0 | -1.923447  | -3.488689 | -6.223254 |
| 83  | 1 | 0 | -0.497734  | -5.429279 | -6.755272 |
| 84  | 1 | 0 | 1.056766   | -2.099092 | -3.473737 |
| 85  | 1 | 0 | 7.889602   | -6.836702 | -3.919873 |
| 86  | 1 | 0 | 5.056269   | -3.131147 | -2.269981 |
| 87  | 1 | 0 | 11.846509  | -2.147419 | 0.343114  |
| 88  | 1 | 0 | 11.500008  | -3.730286 | -0.403587 |
| 89  | 1 | 0 | 7.696783   | 6.094325  | -1.090889 |
| 90  | 1 | 0 | 7.698419   | 4.733042  | -2.255058 |
| 91  | 1 | 0 | 3.071185   | 8.996166  | -2.853734 |
| 92  | 1 | 0 | 4.111037   | 9.303969  | -1.436446 |
| 93  | 1 | 0 | -0.516675  | 8.177179  | -4.627364 |
| 94  | 1 | 0 | -1.284020  | 8.997960  | -3.236053 |
| 95  | 1 | 0 | -4.996158  | 5.690857  | -3.980689 |
| 96  | 1 | 0 | -5.890416  | 4.148471  | -4.004405 |
| 97  | 1 | 0 | 1.411607   | -6.418346 | -7.661363 |
| 98  | 1 | 0 | 0.640587   | -7.393133 | -6.369772 |
| 99  | 1 | 0 | 5.503283   | -8.276089 | -6.219325 |
| 100 | 1 | 0 | 6.460182   | -8.487052 | -4.729179 |
| 101 | 1 | 0 | 10.101978  | -6.180252 | -3.584972 |
| 102 | 1 | 0 | 9.480741   | -7.240597 | -2.282844 |
| 103 | 1 | 0 | 6.725390   | 6.191574  | -2.585187 |
| 104 | 1 | 0 | 2.348056   | 9.533132  | -1.307474 |
| 105 | 1 | 0 | -2.295497  | 8.201571  | -4.466089 |
| 106 | 1 | 0 | -4.902714  | 4.638011  | -5.420228 |
| 107 | 1 | 0 | 11.304053  | -3.521887 | 1.359099  |
| 108 | 1 | 0 | 10.830109  | -6.121400 | -1.958030 |
| 109 | 1 | 0 | 2.380574   | -7.584177 | -6.717499 |
| 110 | 1 | 0 | 7.043272   | -7.397024 | -6.024486 |
| 111 | 7 | 0 | -1.157743  | -1.464757 | -4.411553 |
| 112 | 7 | 0 | 6.965210   | 0.652067  | 3.528305  |
| 113 | 7 | 0 | -3.803715  | -0.903518 | 0.006025  |
| 114 | 6 | 0 | -3.243034  | -1.940233 | -0.643008 |
| 115 | 6 | 0 | -1.866369  | -2.033471 | -0.731557 |
| 116 | 6 | 0 | -1.066981  | -1.050362 | -0.128150 |
| 117 | 6 | 0 | -1.690916  | 0.016681  | 0.537360  |
| 118 | 6 | 0 | -3.071413  | 0.064395  | 0.592117  |
| 119 | 6 | 0 | 0.412526   | -1.146334 | -0.176662 |
| 120 | 6 | 0 | 1.047670   | -2.393515 | -0.073642 |
| 121 | 6 | 0 | 2.427610   | -2.463783 | -0.125744 |
| 122 | 7 | 0 | 3.150120   | -1.338016 | -0.262016 |
| 123 | 6 | 0 | 2.580374   | -0.120100 | -0.354580 |
| 124 | 6 | 0 | 1.203027   | 0.006289  | -0.313990 |
| 125 | 1 | 0 | -3.923443  | -2.667906 | -1.061977 |
| 126 | 1 | 0 | -1.429534  | -2.857137 | -1.281899 |
| 127 | 1 | 0 | -1.123300  | 0.784241  | 1.045252  |
| 128 | 1 | 0 | -3.595085  | 0.860519  | 1.103331  |
| 129 | 1 | 0 | 0.484396   | -3.306455 | 0.071705  |
| 130 | 1 | 0 | 2.978856   | -3.390422 | -0.058777 |
| 131 | 1 | 0 | 3.228046   | 0.742786  | -0.443538 |
| 132 | 1 | 0 | 0.762408   | 0.990019  | -0.420144 |
| 133 | 8 | 0 | 0.120516   | 0.458238  | 3.084085  |
| 134 | 8 | 0 | 3.480273   | 0.463702  | 5.584488  |
| 135 | 8 | 0 | -3.921494  | -4.047729 | 1.417938  |
| 136 | 8 | 0 | -4.020499  | -4.361577 | 5.553795  |
| 137 | 8 | 0 | -7.197879  | -6.311584 | 4.006128  |
| 138 | 8 | 0 | -10.314852 | -4.224098 | 0.876865  |

|     |   |   |            |           |           |
|-----|---|---|------------|-----------|-----------|
| 139 | 8 | 0 | -6.466272  | -1.438287 | -0.136003 |
| 140 | 8 | 0 | -10.337869 | -1.555013 | -1.656743 |
| 141 | 8 | 0 | -2.683109  | 6.990825  | 0.520093  |
| 142 | 8 | 0 | -2.477816  | 2.981935  | 1.805734  |
| 143 | 8 | 0 | 0.360890   | 6.906313  | 2.276364  |
| 144 | 8 | 0 | 3.371100   | 3.770280  | 4.498283  |
| 145 | 7 | 0 | 1.706656   | 1.793537  | 4.060137  |
| 146 | 7 | 0 | 0.781843   | -4.692589 | 2.729484  |
| 147 | 7 | 0 | -5.247907  | -4.699799 | 3.162375  |
| 148 | 7 | 0 | -8.446304  | -2.540411 | 0.084306  |
| 149 | 7 | 0 | -7.478732  | 3.255053  | -1.450467 |
| 150 | 7 | 0 | -1.377350  | 4.987035  | 1.835997  |
| 151 | 6 | 0 | 1.161107   | 0.586169  | 3.740904  |
| 152 | 6 | 0 | 1.929056   | -0.647918 | 4.167407  |
| 153 | 6 | 0 | 3.078549   | -0.695056 | 4.998221  |
| 154 | 6 | 0 | 3.760808   | -1.907921 | 5.179108  |
| 155 | 6 | 0 | 3.337926   | -3.060192 | 4.527816  |
| 156 | 6 | 0 | 2.170102   | -3.047028 | 3.755239  |
| 157 | 6 | 0 | 1.477315   | -1.842826 | 3.597427  |
| 158 | 6 | 0 | -0.383942  | -4.418935 | 3.512034  |
| 159 | 6 | 0 | -0.390113  | -4.339043 | 4.912750  |
| 160 | 6 | 0 | -1.596057  | -4.323804 | 5.603173  |
| 161 | 6 | 0 | -2.819669  | -4.362606 | 4.915997  |
| 162 | 6 | 0 | -2.831595  | -4.412362 | 3.498776  |
| 163 | 6 | 0 | -1.605519  | -4.472944 | 2.834593  |
| 164 | 6 | 0 | -4.048416  | -4.367197 | 2.605542  |
| 165 | 6 | 0 | -6.514312  | -4.610629 | 2.541447  |
| 166 | 6 | 0 | -7.545160  | -5.446986 | 3.009012  |
| 167 | 6 | 0 | -8.828483  | -5.347026 | 2.458579  |
| 168 | 6 | 0 | -9.093596  | -4.404529 | 1.462271  |
| 169 | 6 | 0 | -8.072013  | -3.541322 | 1.010537  |
| 170 | 6 | 0 | -6.791222  | -3.668961 | 1.550741  |
| 171 | 6 | 0 | -7.690858  | -1.506557 | -0.357336 |
| 172 | 6 | 0 | -8.383229  | -0.365561 | -1.048913 |
| 173 | 6 | 0 | -9.666719  | -0.372822 | -1.657210 |
| 174 | 6 | 0 | -10.170460 | 0.804795  | -2.228846 |
| 175 | 6 | 0 | -9.439357  | 1.992778  | -2.175353 |
| 176 | 6 | 0 | -8.191468  | 2.021707  | -1.547834 |
| 177 | 6 | 0 | -7.679193  | 0.830597  | -1.023577 |
| 178 | 6 | 0 | -5.653795  | 4.236106  | -0.434762 |
| 179 | 6 | 0 | -5.772803  | 5.555559  | -0.899581 |
| 180 | 6 | 0 | -4.785986  | 6.479373  | -0.578192 |
| 181 | 6 | 0 | -3.664613  | 6.112578  | 0.194690  |
| 182 | 6 | 0 | -3.533877  | 4.785440  | 0.675173  |
| 183 | 6 | 0 | -4.552184  | 3.896635  | 0.353176  |
| 184 | 6 | 0 | -2.412773  | 4.178028  | 1.489342  |
| 185 | 6 | 0 | -0.202112  | 4.636929  | 2.531475  |
| 186 | 6 | 0 | 0.727450   | 5.674836  | 2.749672  |
| 187 | 6 | 0 | 1.927315   | 5.418285  | 3.416286  |
| 188 | 6 | 0 | 2.218637   | 4.124445  | 3.852020  |
| 189 | 6 | 0 | 1.304643   | 3.073950  | 3.624880  |
| 190 | 6 | 0 | 0.092572   | 3.346489  | 2.985451  |
| 191 | 6 | 0 | 4.711467   | 0.505003  | 6.319363  |
| 192 | 6 | 0 | -4.063714  | -4.275934 | 6.982541  |
| 193 | 6 | 0 | -8.202478  | -7.160036 | 4.557472  |
| 194 | 6 | 0 | -11.406545 | -5.036819 | 1.302864  |
| 195 | 6 | 0 | -11.627595 | -1.634106 | -2.274781 |
| 196 | 6 | 0 | -2.733693  | 8.335997  | 0.034951  |
| 197 | 6 | 0 | 1.327523   | 7.952212  | 2.273656  |
| 198 | 6 | 0 | 4.361572   | 4.765496  | 4.734843  |
| 199 | 1 | 0 | 2.564571   | 1.773681  | 4.602609  |
| 200 | 1 | 0 | -5.243265  | -5.007491 | 4.126718  |

|     |   |   |            |           |           |
|-----|---|---|------------|-----------|-----------|
| 201 | 1 | 0 | -9.424185  | -2.542144 | -0.188377 |
| 202 | 1 | 0 | -1.419874  | 5.949287  | 1.517897  |
| 203 | 1 | 0 | 4.646926   | -1.946685 | 5.799169  |
| 204 | 1 | 0 | 3.908920   | -3.978691 | 4.619343  |
| 205 | 1 | 0 | 0.595805   | -1.786574 | 2.971631  |
| 206 | 1 | 0 | 0.540436   | -4.327045 | 5.468112  |
| 207 | 1 | 0 | -1.579826  | -4.288912 | 6.684783  |
| 208 | 1 | 0 | -1.617815  | -4.553531 | 1.753719  |
| 209 | 1 | 0 | -9.618786  | -5.994100 | 2.810465  |
| 210 | 1 | 0 | -6.004500  | -3.025790 | 1.205619  |
| 211 | 1 | 0 | -11.140832 | 0.804069  | -2.708148 |
| 212 | 1 | 0 | -9.846030  | 2.904487  | -2.601564 |
| 213 | 1 | 0 | -6.706422  | 0.848774  | -0.557454 |
| 214 | 1 | 0 | -6.629884  | 5.849212  | -1.495637 |
| 215 | 1 | 0 | -4.884777  | 7.498344  | -0.930397 |
| 216 | 1 | 0 | -4.481298  | 2.883589  | 0.721170  |
| 217 | 1 | 0 | 2.630971   | 6.219227  | 3.590802  |
| 218 | 1 | 0 | -0.616533  | 2.554328  | 2.830315  |
| 219 | 1 | 0 | 4.661390   | -0.148503 | 7.195906  |
| 220 | 1 | 0 | 4.815450   | 1.539922  | 6.642278  |
| 221 | 1 | 0 | -3.578673  | -5.141379 | 7.444926  |
| 222 | 1 | 0 | -3.593044  | -3.352394 | 7.333186  |
| 223 | 1 | 0 | -9.018615  | -6.577193 | 4.999188  |
| 224 | 1 | 0 | -7.708362  | -7.740673 | 5.336371  |
| 225 | 1 | 0 | -11.620233 | -4.888010 | 2.367144  |
| 226 | 1 | 0 | -11.208069 | -6.097536 | 1.113067  |
| 227 | 1 | 0 | -11.946769 | -2.668249 | -2.153088 |
| 228 | 1 | 0 | -11.563781 | -1.391728 | -3.339902 |
| 229 | 1 | 0 | -3.624639  | 8.853388  | 0.403344  |
| 230 | 1 | 0 | -2.712278  | 8.351598  | -1.058408 |
| 231 | 1 | 0 | 0.840061   | 8.809120  | 1.807850  |
| 232 | 1 | 0 | 2.210846   | 7.672755  | 1.687954  |
| 233 | 1 | 0 | 3.980121   | 5.559292  | 5.387414  |
| 234 | 1 | 0 | 4.717024   | 5.202479  | 3.794849  |
| 235 | 1 | 0 | -5.121641  | -4.268215 | 7.241867  |
| 236 | 1 | 0 | -8.607155  | -7.840803 | 3.800176  |
| 237 | 1 | 0 | -12.265434 | -4.717828 | 0.712760  |
| 238 | 1 | 0 | -12.341258 | -0.966502 | -1.782152 |
| 239 | 1 | 0 | 5.556535   | 0.232746  | 5.680647  |
| 240 | 1 | 0 | 5.186864   | 4.251975  | 5.227141  |
| 241 | 1 | 0 | -1.841455  | 8.819541  | 0.429942  |
| 242 | 1 | 0 | 1.629046   | 8.223286  | 3.291867  |
| 243 | 7 | 0 | -6.509570  | 3.148592  | -0.648167 |
| 244 | 7 | 0 | 1.911177   | -4.184489 | 2.920649  |
| 245 | 1 | 0 | -4.839816  | -0.885600 | 0.037671  |
| 246 | 1 | 0 | 4.181023   | -1.435604 | -0.337133 |

Standard orientation for the optimized structure of  $Z_2Z-1_2\supset G1$

| Center<br>Number | Atomic<br>Number | Atomic<br>type | Coordinates (Angstroms) |          |           |
|------------------|------------------|----------------|-------------------------|----------|-----------|
|                  |                  |                | X                       | Y        | Z         |
| 1                | 8                | 0              | -6.070184               | 2.115816 | -2.321806 |
| 2                | 8                | 0              | -3.719345               | 1.530176 | -5.642602 |
| 3                | 8                | 0              | -2.658096               | 4.440859 | -0.688270 |
| 4                | 8                | 0              | 0.000225                | 7.624048 | -1.116171 |
| 5                | 8                | 0              | 1.539225                | 5.301556 | 1.228443  |
| 6                | 8                | 0              | 0.083085                | 1.966253 | 4.487693  |
| 7                | 8                | 0              | -4.338572               | 2.956816 | 2.718782  |

|    |   |   |            |           |           |
|----|---|---|------------|-----------|-----------|
| 8  | 8 | 0 | -2.745065  | -0.307726 | 4.651876  |
| 9  | 8 | 0 | -9.654400  | -3.391415 | 1.082362  |
| 10 | 8 | 0 | -6.955266  | -0.218973 | 0.659458  |
| 11 | 8 | 0 | -7.840656  | -4.106183 | -1.949612 |
| 12 | 8 | 0 | -5.526495  | -1.593837 | -5.438671 |
| 13 | 7 | 0 | -5.698969  | 0.618278  | -4.016089 |
| 14 | 7 | 0 | -4.873952  | 7.641273  | -3.858037 |
| 15 | 7 | 0 | -0.951630  | 5.553997  | 0.345792  |
| 16 | 7 | 0 | -2.400303  | 2.193395  | 3.673842  |
| 17 | 7 | 0 | -8.107122  | 1.093729  | 5.444334  |
| 18 | 7 | 0 | -8.000023  | -1.924747 | -0.451830 |
| 19 | 6 | 0 | -5.637558  | 1.860800  | -3.451668 |
| 20 | 6 | 0 | -5.040384  | 2.964743  | -4.286020 |
| 21 | 6 | 0 | -4.077958  | 2.807524  | -5.312155 |
| 22 | 6 | 0 | -3.530039  | 3.937354  | -5.930352 |
| 23 | 6 | 0 | -3.935446  | 5.216181  | -5.555217 |
| 24 | 6 | 0 | -4.913675  | 5.381751  | -4.569808 |
| 25 | 6 | 0 | -5.464492  | 4.256515  | -3.958229 |
| 26 | 6 | 0 | -3.579765  | 7.524581  | -3.253469 |
| 27 | 6 | 0 | -2.706483  | 8.607288  | -3.412577 |
| 28 | 6 | 0 | -1.493492  | 8.639582  | -2.735000 |
| 29 | 6 | 0 | -1.163557  | 7.626384  | -1.822801 |
| 30 | 6 | 0 | -2.062882  | 6.552372  | -1.604487 |
| 31 | 6 | 0 | -3.246254  | 6.515253  | -2.345957 |
| 32 | 6 | 0 | -1.904022  | 5.420838  | -0.619670 |
| 33 | 6 | 0 | -0.704483  | 4.634577  | 1.389816  |
| 34 | 6 | 0 | 0.618570   | 4.506903  | 1.851055  |
| 35 | 6 | 0 | 0.915497   | 3.615938  | 2.889656  |
| 36 | 6 | 0 | -0.104449  | 2.861071  | 3.474645  |
| 37 | 6 | 0 | -1.440141  | 3.000067  | 3.032773  |
| 38 | 6 | 0 | -1.723451  | 3.896864  | 1.999749  |
| 39 | 6 | 0 | -3.752471  | 2.189722  | 3.489822  |
| 40 | 6 | 0 | -4.549394  | 1.196846  | 4.301726  |
| 41 | 6 | 0 | -4.073356  | -0.036632 | 4.810852  |
| 42 | 6 | 0 | -4.960835  | -0.919186 | 5.439493  |
| 43 | 6 | 0 | -6.305803  | -0.588660 | 5.581894  |
| 44 | 6 | 0 | -6.779184  | 0.643056  | 5.117325  |
| 45 | 6 | 0 | -5.893893  | 1.526264  | 4.499440  |
| 46 | 6 | 0 | -9.148404  | -0.546123 | 4.090074  |
| 47 | 6 | 0 | -10.086051 | -1.572324 | 4.255551  |
| 48 | 6 | 0 | -10.246476 | -2.544661 | 3.275201  |
| 49 | 6 | 0 | -9.520518  | -2.473522 | 2.077474  |
| 50 | 6 | 0 | -8.607971  | -1.406851 | 1.868495  |
| 51 | 6 | 0 | -8.434147  | -0.471505 | 2.892900  |
| 52 | 6 | 0 | -7.786768  | -1.150301 | 0.637272  |
| 53 | 6 | 0 | -7.361265  | -1.819472 | -1.708893 |
| 54 | 6 | 0 | -7.290545  | -2.982575 | -2.498169 |
| 55 | 6 | 0 | -6.687986  | -2.932549 | -3.759392 |
| 56 | 6 | 0 | -6.152975  | -1.732652 | -4.232556 |
| 57 | 6 | 0 | -6.239816  | -0.554709 | -3.456705 |
| 58 | 6 | 0 | -6.862972  | -0.613353 | -2.208029 |
| 59 | 6 | 0 | -2.788367  | 1.320033  | -6.705951 |
| 60 | 6 | 0 | 0.920815   | 8.710929  | -1.261114 |
| 61 | 6 | 0 | 2.899378   | 5.221394  | 1.649033  |
| 62 | 6 | 0 | 1.411516   | 1.717710  | 4.951034  |
| 63 | 6 | 0 | -2.215273  | -1.542856 | 5.139891  |
| 64 | 6 | 0 | -10.600626 | -4.458923 | 1.217823  |
| 65 | 6 | 0 | -7.917085  | -5.287246 | -2.745519 |
| 66 | 6 | 0 | -5.494166  | -2.707810 | -6.328487 |
| 67 | 1 | 0 | -5.262669  | 0.504762  | -4.923916 |
| 68 | 1 | 0 | -0.282242  | 6.307029  | 0.231802  |
| 69 | 1 | 0 | -2.021216  | 1.502611  | 4.310898  |

|     |   |   |            |           |           |
|-----|---|---|------------|-----------|-----------|
| 70  | 1 | 0 | -8.625815  | -2.715490 | -0.330172 |
| 71  | 1 | 0 | -2.784967  | 3.831118  | -6.708337 |
| 72  | 1 | 0 | -3.510026  | 6.082754  | -6.050739 |
| 73  | 1 | 0 | -6.217875  | 4.367226  | -3.186704 |
| 74  | 1 | 0 | -2.982674  | 9.419941  | -4.076701 |
| 75  | 1 | 0 | -0.820165  | 9.471168  | -2.897199 |
| 76  | 1 | 0 | -3.917604  | 5.690167  | -2.151873 |
| 77  | 1 | 0 | 1.932454   | 3.507803  | 3.237430  |
| 78  | 1 | 0 | -2.741347  | 4.009018  | 1.668483  |
| 79  | 1 | 0 | -4.610958  | -1.869409 | 5.822284  |
| 80  | 1 | 0 | -6.980300  | -1.279083 | 6.077313  |
| 81  | 1 | 0 | -6.246779  | 2.480292  | 4.124416  |
| 82  | 1 | 0 | -10.683136 | -1.606929 | 5.161077  |
| 83  | 1 | 0 | -10.957738 | -3.344068 | 3.436657  |
| 84  | 1 | 0 | -7.745306  | 0.340092  | 2.705604  |
| 85  | 1 | 0 | -6.629863  | -3.825102 | -4.365166 |
| 86  | 1 | 0 | -6.964725  | 0.291656  | -1.635240 |
| 87  | 1 | 0 | -3.159857  | 1.737459  | -7.647561 |
| 88  | 1 | 0 | -2.690756  | 0.238787  | -6.799840 |
| 89  | 1 | 0 | 1.285662   | 8.780645  | -2.290529 |
| 90  | 1 | 0 | 0.460714   | 9.657967  | -0.962636 |
| 91  | 1 | 0 | 3.008535   | 5.505888  | 2.702019  |
| 92  | 1 | 0 | 3.447284   | 5.927509  | 1.025011  |
| 93  | 1 | 0 | 1.870987   | 2.632692  | 5.341411  |
| 94  | 1 | 0 | 2.030177   | 1.287792  | 4.157554  |
| 95  | 1 | 0 | -1.146011  | -1.502092 | 4.935285  |
| 96  | 1 | 0 | -2.651600  | -2.394616 | 4.608793  |
| 97  | 1 | 0 | -11.617359 | -4.068875 | 1.321321  |
| 98  | 1 | 0 | -10.353121 | -5.094099 | 2.073554  |
| 99  | 1 | 0 | -8.431472  | -6.027531 | -2.132883 |
| 100 | 1 | 0 | -6.918932  | -5.660501 | -3.001372 |
| 101 | 1 | 0 | -6.506128  | -3.043876 | -6.579341 |
| 102 | 1 | 0 | -4.925917  | -3.542119 | -5.901493 |
| 103 | 1 | 0 | 1.750150   | 8.479595  | -0.594017 |
| 104 | 1 | 0 | 3.298796   | 4.213984  | 1.494686  |
| 105 | 1 | 0 | 1.310057   | 0.996022  | 5.761952  |
| 106 | 1 | 0 | -2.378161  | -1.645815 | 6.217730  |
| 107 | 1 | 0 | -1.812175  | 1.756281  | -6.469030 |
| 108 | 1 | 0 | -4.995226  | -2.355283 | -7.230954 |
| 109 | 1 | 0 | -10.520157 | -5.035512 | 0.297433  |
| 110 | 1 | 0 | -8.488591  | -5.111354 | -3.663535 |
| 111 | 7 | 0 | -9.142968  | 0.500499  | 5.070480  |
| 112 | 7 | 0 | -5.504020  | 6.677193  | -4.344377 |
| 113 | 7 | 0 | -4.383501  | 0.233834  | 0.060835  |
| 114 | 6 | 0 | -3.761947  | -0.959684 | 0.110419  |
| 115 | 6 | 0 | -2.405981  | -1.046482 | -0.134571 |
| 116 | 6 | 0 | -1.683024  | 0.123940  | -0.423926 |
| 117 | 6 | 0 | -2.360988  | 1.349711  | -0.437855 |
| 118 | 6 | 0 | -3.728753  | 1.378885  | -0.199084 |
| 119 | 6 | 0 | -0.232147  | 0.034786  | -0.739206 |
| 120 | 6 | 0 | 0.713464   | 0.886281  | -0.143323 |
| 121 | 6 | 0 | 2.056253   | 0.748268  | -0.461381 |
| 122 | 7 | 0 | 2.430707   | -0.184219 | -1.360440 |
| 123 | 6 | 0 | 1.558905   | -1.019215 | -1.953409 |
| 124 | 6 | 0 | 0.213527   | -0.935850 | -1.648887 |
| 125 | 1 | 0 | -4.380921  | -1.816221 | 0.343500  |
| 126 | 1 | 0 | -1.923178  | -2.013763 | -0.079995 |
| 127 | 1 | 0 | -1.871554  | 2.292209  | -0.650158 |
| 128 | 1 | 0 | -4.308670  | 2.290957  | -0.231245 |
| 129 | 1 | 0 | 0.420966   | 1.631987  | 0.586333  |
| 130 | 1 | 0 | 2.846642   | 1.343468  | -0.014327 |
| 131 | 1 | 0 | 1.979692   | -1.745785 | -2.632273 |

|     |   |   |           |           |           |
|-----|---|---|-----------|-----------|-----------|
| 132 | 1 | 0 | -0.477434 | -1.612578 | -2.135176 |
| 133 | 8 | 0 | 4.517281  | -1.171819 | -2.741725 |
| 134 | 8 | 0 | 8.621268  | -1.122707 | -2.969327 |
| 135 | 8 | 0 | 4.640764  | 1.956701  | 1.037496  |
| 136 | 8 | 0 | 7.480877  | 4.729718  | 2.312380  |
| 137 | 8 | 0 | 7.683035  | 2.304728  | 4.816725  |
| 138 | 8 | 0 | 5.383572  | -1.707719 | 6.372039  |
| 139 | 8 | 0 | 2.352139  | -0.800747 | 2.739331  |
| 140 | 8 | 0 | 3.543159  | -4.315286 | 4.663319  |
| 141 | 8 | 0 | 1.091854  | -7.865562 | -2.170714 |
| 142 | 8 | 0 | 2.071698  | -3.859205 | -1.511469 |
| 143 | 8 | 0 | 4.291491  | -7.609747 | -3.660591 |
| 144 | 8 | 0 | 7.680454  | -4.257241 | -4.708598 |
| 145 | 7 | 0 | 6.301273  | -2.412529 | -3.446016 |
| 146 | 7 | 0 | 5.731606  | 4.630988  | -3.003952 |
| 147 | 7 | 0 | 6.205956  | 2.367883  | 2.654820  |
| 148 | 7 | 0 | 3.827315  | -1.684058 | 4.252915  |
| 149 | 7 | 0 | -1.464679 | -3.926382 | 2.195275  |
| 150 | 7 | 0 | 2.876350  | -5.829485 | -2.346227 |
| 151 | 6 | 0 | 5.711615  | -1.246562 | -3.096886 |
| 152 | 6 | 0 | 6.542572  | 0.000706  | -3.198683 |
| 153 | 6 | 0 | 7.955725  | 0.057926  | -3.097113 |
| 154 | 6 | 0 | 8.604772  | 1.298586  | -3.129780 |
| 155 | 6 | 0 | 7.875952  | 2.475164  | -3.264725 |
| 156 | 6 | 0 | 6.483370  | 2.430022  | -3.397984 |
| 157 | 6 | 0 | 5.837752  | 1.194911  | -3.388498 |
| 158 | 6 | 0 | 6.251426  | 4.608504  | -1.665920 |
| 159 | 6 | 0 | 7.047734  | 5.670234  | -1.227119 |
| 160 | 6 | 0 | 7.485523  | 5.712614  | 0.093331  |
| 161 | 6 | 0 | 7.084079  | 4.730271  | 1.011046  |
| 162 | 6 | 0 | 6.205801  | 3.695856  | 0.598437  |
| 163 | 6 | 0 | 5.819618  | 3.655912  | -0.742031 |
| 164 | 6 | 0 | 5.612676  | 2.605752  | 1.457200  |
| 165 | 6 | 0 | 5.926971  | 1.344663  | 3.584537  |
| 166 | 6 | 0 | 6.748968  | 1.310132  | 4.731876  |
| 167 | 6 | 0 | 6.587785  | 0.302147  | 5.683622  |
| 168 | 6 | 0 | 5.604056  | -0.673300 | 5.506367  |
| 169 | 6 | 0 | 4.762698  | -0.636487 | 4.374844  |
| 170 | 6 | 0 | 4.935315  | 0.371799  | 3.421605  |
| 171 | 6 | 0 | 2.724420  | -1.738687 | 3.455525  |
| 172 | 6 | 0 | 1.927773  | -3.024968 | 3.481682  |
| 173 | 6 | 0 | 2.341102  | -4.268985 | 4.025483  |
| 174 | 6 | 0 | 1.517373  | -5.396150 | 3.899457  |
| 175 | 6 | 0 | 0.298031  | -5.313595 | 3.238411  |
| 176 | 6 | 0 | -0.133723 | -4.088580 | 2.716053  |
| 177 | 6 | 0 | 0.671147  | -2.959795 | 2.869906  |
| 178 | 6 | 0 | -1.092113 | -5.509456 | 0.483564  |
| 179 | 6 | 0 | -1.558005 | -6.787095 | 0.156931  |
| 180 | 6 | 0 | -0.825670 | -7.597124 | -0.706052 |
| 181 | 6 | 0 | 0.348118  | -7.120468 | -1.309796 |
| 182 | 6 | 0 | 0.787406  | -5.798335 | -1.048775 |
| 183 | 6 | 0 | 0.059743  | -5.027861 | -0.140446 |
| 184 | 6 | 0 | 1.964439  | -5.083560 | -1.667046 |
| 185 | 6 | 0 | 4.071742  | -5.384077 | -2.946528 |
| 186 | 6 | 0 | 4.828451  | -6.354168 | -3.639191 |
| 187 | 6 | 0 | 6.040856  | -6.007176 | -4.238738 |
| 188 | 6 | 0 | 6.506781  | -4.692203 | -4.162932 |
| 189 | 6 | 0 | 5.751688  | -3.713324 | -3.484587 |
| 190 | 6 | 0 | 4.548038  | -4.071637 | -2.874259 |
| 191 | 6 | 0 | 10.046577 | -1.117832 | -2.837251 |
| 192 | 6 | 0 | 8.381844  | 5.737831  | 2.783843  |
| 193 | 6 | 0 | 8.559204  | 2.330617  | 5.941609  |

|     |   |   |           |           |           |
|-----|---|---|-----------|-----------|-----------|
| 194 | 6 | 0 | 6.229081  | -1.838489 | 7.512868  |
| 195 | 6 | 0 | 3.997007  | -5.543736 | 5.240594  |
| 196 | 6 | 0 | 0.691550  | -9.203457 | -2.486448 |
| 197 | 6 | 0 | 5.008828  | -8.654952 | -4.314336 |
| 198 | 6 | 0 | 8.520794  | -5.197224 | -5.376046 |
| 199 | 1 | 0 | 7.275193  | -2.358453 | -3.723957 |
| 200 | 1 | 0 | 6.964491  | 2.989250  | 2.917612  |
| 201 | 1 | 0 | 4.010612  | -2.493795 | 4.834754  |
| 202 | 1 | 0 | 2.675727  | -6.818167 | -2.454773 |
| 203 | 1 | 0 | 9.682624  | 1.354722  | -3.050256 |
| 204 | 1 | 0 | 8.394974  | 3.427047  | -3.293629 |
| 205 | 1 | 0 | 4.761539  | 1.148229  | -3.508027 |
| 206 | 1 | 0 | 7.343372  | 6.446743  | -1.925174 |
| 207 | 1 | 0 | 8.129995  | 6.523068  | 0.408166  |
| 208 | 1 | 0 | 5.145471  | 2.864421  | -1.039261 |
| 209 | 1 | 0 | 7.224803  | 0.275108  | 6.555484  |
| 210 | 1 | 0 | 4.302907  | 0.396535  | 2.551652  |
| 211 | 1 | 0 | 1.825525  | -6.346615 | 4.315193  |
| 212 | 1 | 0 | -0.326716 | -6.195667 | 3.152313  |
| 213 | 1 | 0 | 0.352811  | -2.001224 | 2.476526  |
| 214 | 1 | 0 | -2.480197 | -7.153207 | 0.596667  |
| 215 | 1 | 0 | -1.183929 | -8.595389 | -0.921976 |
| 216 | 1 | 0 | 0.409454  | -4.019644 | 0.039360  |
| 217 | 1 | 0 | 6.617393  | -6.755074 | -4.763180 |
| 218 | 1 | 0 | 3.982287  | -3.334559 | -2.335927 |
| 219 | 1 | 0 | 10.524126 | -0.682974 | -3.720948 |
| 220 | 1 | 0 | 10.333439 | -2.164479 | -2.744145 |
| 221 | 1 | 0 | 9.327270  | 5.708825  | 2.233406  |
| 222 | 1 | 0 | 7.933430  | 6.732648  | 2.703747  |
| 223 | 1 | 0 | 8.000934  | 2.447926  | 6.877052  |
| 224 | 1 | 0 | 9.206523  | 3.195391  | 5.796778  |
| 225 | 1 | 0 | 6.144251  | -0.968045 | 8.172960  |
| 226 | 1 | 0 | 7.275927  | -1.974472 | 7.219091  |
| 227 | 1 | 0 | 4.963455  | -5.314321 | 5.687392  |
| 228 | 1 | 0 | 4.120471  | -6.314918 | 4.474255  |
| 229 | 1 | 0 | -0.288972 | -9.214410 | -2.972204 |
| 230 | 1 | 0 | 0.671079  | -9.830032 | -1.589429 |
| 231 | 1 | 0 | 4.402583  | -9.552710 | -4.194727 |
| 232 | 1 | 0 | 5.989218  | -8.813222 | -3.851600 |
| 233 | 1 | 0 | 8.018471  | -5.628891 | -6.248769 |
| 234 | 1 | 0 | 8.835887  | -5.998710 | -4.698683 |
| 235 | 1 | 0 | 8.559195  | 5.499661  | 3.831646  |
| 236 | 1 | 0 | 9.170337  | 1.422549  | 5.990213  |
| 237 | 1 | 0 | 5.882134  | -2.725955 | 8.041864  |
| 238 | 1 | 0 | 3.307032  | -5.893637 | 6.014896  |
| 239 | 1 | 0 | 10.354000 | -0.571198 | -1.940428 |
| 240 | 1 | 0 | 9.394475  | -4.634977 | -5.704846 |
| 241 | 1 | 0 | 1.446511  | -9.576035 | -3.177428 |
| 242 | 1 | 0 | 5.136469  | -8.441636 | -5.381291 |
| 243 | 7 | 0 | -1.922825 | -4.645658 | 1.275284  |
| 244 | 7 | 0 | 5.737221  | 3.615604  | -3.736436 |
| 245 | 1 | 0 | -5.417838 | 0.218867  | 0.224743  |
| 246 | 1 | 0 | 3.419720  | -0.306354 | -1.652251 |

---



## References

- [1] Ye, Z.; Yang, Z.; Wang, L.; Chen, L.; Cai, Y.; Deng, P.; Feng, W.; Li, X.; Yuan, L., A Dynamic Hydrogen-Bonded Azo-Macrocyclic for Precisely Photo-Controlled Molecular Encapsulation and Release. *Angew. Chem. Int. Ed.* **2019**, *131*, 12649-12653.
- [2] Cheng, M.; Zhang, J.; Ren, X.; Guo, S.; Xiao, T.; Hu, X.-Y.; Jiang, J.; Wang, L., Acid/base-Controllable Fluorescent Molecular Switches Based on Cryptands and Basic N-heteroaromatics. *Chem. Commun.* **2017**, *53*, 11838-11841.
- [3] Han, Y.; Meng, Z.; Chen, C.-F., Acid/Base Controllable Complexation of a Triptycene-Derived Macrotricyclic Host and Protonated 4,4'-Bipyridinium/Pyridinium Salts. *Chem. Commun.* **2016**, *52*, 590-593.
- [4] Xiao, Y.; Chu L.; Sanakis, Y.; Liu, P., Revisiting the IspH Catalytic System in the Deoxyxylulose Phosphate Pathway: Achieving High Activity. *J. Am. Chem. Soc.* **2009**, *131*, 9931.
- [5] Gaussian 09, Revision B.01, M. J. Frisch, G. W. Trucks, H. B. Schlegel, G. E. Scuseria, M. A. Robb, J. R. Cheeseman, G. Scalmani, V. Barone, B. Mennucci, G. A. Petersson, H. Nakatsuji, M. Caricato, X. Li, H. P. Hratchian, A. F. Izmaylov, J. Bloino, G. Zheng, J. L. Sonnenberg, M. Hada, M. Ehara, K. Toyota, R. Fukuda, J. Hasegawa, M. Ishida, T. Nakajima, Y. Honda, O. Kitao, H. Nakai, T. Vreven, J. A. Montgomery, Jr., J. E. Peralta, F. Ogliaro, M. Bearpark, J. J. Heyd, E. Brothers, K. N. Kudin, V. N. Staroverov, T. Keith, R. Kobayashi, J. Normand, K. Raghavachari, A. Rendell, J. C. Burant, S. S. Iyengar, J. Tomasi, M. Cossi, N. Rega, J. M. Millam, M. Klene, J. E. Knox, J. B. Cross, V. Bakken, C. Adamo, J. Jaramillo, R. Gomperts, R. E. Stratmann, O. Yazyev, A. J. Austin, R. Cammi, C. Pomelli, J. W. Ochterski, R. L. Martin, K. Morokuma, V. G. Zakrzewski, G. A. Voth, P. Salvador, J. J. Annenberger, S. Dapprich, A. D. Daniels, O. Farkas, J. B. Foresman, J. V. Ortiz, J. Cioslowski, and D. J. Fox, Gaussian, Inc., Wallingford CT, USA, **2013**.
- [6] Lefebvre, C.; Rubez, G.; Khartabil, H.; Boisson, J.-C.; Contreras-García, J.; Hénon, E. Accurately Extracting the Signature of Intermolecular Interactions Present in the NCI Plot of the Reduced Density Gradient Versus Electron Density. *Phys. Chem. Chem. Phys.* **2017**, *19*, 17928-17936.
- [7] Lu, T.; Chen, F. Multiwfn: A Multifunctional Wavefunction Analyzer. *J. Comput. Chem.* **2012**, *33*, 580-592.
- [8] The PyMOL Molecular Graphics System, Version 2.3.0 Schrödinger, LLC: New York, NY, USA, **2019**.
